# Supplementary material for: Host Genetic Risk Factors for West Nile Virus Infection and Disease Progression
Source: PLoS One. 2011 Sep 15;6(9):e24745. doi: 10.1371/journal.pone.0024745 (PMC3174177; doi:10.1371/journal.pone.0024745)
Supplement: Table S1 — SNPs included on the Illumina Custom OPA. (XLS) [file pone.0024745.s001.xls]

## Sheet: Sheet1
Table S1. SNPs included on the Illumina Custom OPA.
SNP	CHR	Position	Gene	Genotyping Success
rs2254002	1	65074257	JAK1	Yes
rs4916004	1	65076098	JAK1	Yes
rs12129819	1	65076247	JAK1	No
rs310244	1	65078465	JAK1	Yes
rs310247	1	65079997	JAK1	Yes
rs2230587	1	65083850	JAK1	Yes
rs10789166	1	65085401	JAK1	Yes
rs310219	1	65087886	JAK1	Yes
rs188698	1	65091172	JAK1	Yes
rs2256298	1	65103270	JAK1	Yes
rs11585932	1	65107683	JAK1	Yes
rs12135754	1	65115093	JAK1	Yes
rs310201	1	65122196	JAK1	Yes
rs310199	1	65122710	JAK1	Yes
rs310198	1	65123656	JAK1	Yes
rs10802189	1	116858253	CD58	Yes
rs17036001	1	116916652	CD58	Yes
rs1335531	1	116916900	CD58	Yes
rs6701046	1	117099257	CD2	Yes
rs3136705	1	117104923	CD2	Yes
rs798043	1	117105020	CD2	Yes
rs699738	1	117112670	CD2	No
rs1801274	1	159746369	FCGR2A	Yes
rs410236	1	159751260	FCGR2A	No
rs627839	1	180808704	RNASEL	Yes
rs11072	1	180809954	RNASEL	Yes
rs672527	1	180811844	RNASEL	Yes
rs533259	1	180815642	RNASEL	Yes
rs627928	1	180817960	RNASEL	Yes
rs486907	1	180821180	RNASEL	Yes
rs3024498	1	205008152	IL10	Yes
rs3024496	1	205008487	IL10	Yes
rs3024509	1	205009920	IL10	Yes
rs3024493	1	205010591	IL10	No
rs3021094	1	205011575	IL10	Yes
rs1800871	1	205013257	IL10	Yes
rs1800896	1	205013520	IL10	Yes
rs3770768	2	37199655	EIF2AK2	Yes
rs4648212	2	37206515	EIF2AK2	Yes
rs4670185	2	37209038	EIF2AK2	Yes
rs4648186	2	37220611	EIF2AK2	Yes
rs4648184	2	37220999	EIF2AK2	Yes
rs2373114	2	37226754	EIF2AK2	Yes
rs2254958	2	37229795	EIF2AK2	Yes
rs12712526	2	37236819	EIF2AK2	Yes
rs7340267	2	37237964	EIF2AK2	Yes
rs1990760	2	162832297	IFIH1	Yes
rs3747517	2	162837070	IFIH1	Yes
rs13023380	2	162862609	IFIH1	Yes
rs17715343	2	162875992	IFIH1	Yes
rs2059691	2	179010130	PRKRA	Yes
rs2288320	2	179016748	PRKRA	Yes
rs3752689	2	179020859	PRKRA	Yes
rs3771300	2	191543841	STAT1	Yes
rs2066804	2	191550004	STAT1	Yes
rs12693591	2	191568747	STAT1	Yes
rs10173099	2	191575577	STAT1	Yes
rs1879877	2	204278245	CD28	Yes
rs3181096	2	204278337	CD28	Yes
rs3116494	2	204300266	CD28	Yes
rs3116496	2	204302757	CD28	No
rs16840252	2	204439764	CTLA4	Yes
rs11571317	2	204440253	CTLA4	Yes
rs5742909	2	204440592	CTLA4	Yes
rs231775	2	204440959	CTLA4	No
rs41265961	2	204444106	CTLA4	Yes
rs11883722	2	204509090	ICOS	Yes
rs4264550	2	204529739	ICOS	Yes
rs10183087	2	204532569	ICOS	Yes
rs10932035	2	204532897	ICOS	Yes
PDCD1_011762	2	242439999	PDCD1	No
rs6705653	2	242442232	PDCD1	Yes
PDCD1_008885	2	242442870	PCDC1	Yes
rs7419333	2	242443985	PDCD1	Yes
rs4988457	3	38157140	MYD88	Yes
rs7744	3	38159025	MYD88	Yes
rs6853	3	38159374	MYD88	Yes
rs1799988	3	46387263	CCR5	Yes
rs352140	3	52231737	TLR9	Yes
rs187084	3	52236071	TLR9	Yes
rs17281703	3	120726239	CD80	Yes
rs1599796	3	120726624	CD80	Yes
rs7628626	3	120727111	CD80	Yes
rs2629396	3	120731657	CD80	Yes
rs2228017	3	120746370	CD80	Yes
rs9282638	3	120746460	CD80	Yes
rs16829980	3	120761158	CD80	Yes
rs16829984	3	120761230	CD80	Yes
rs1880661	3	120761538	CD80	Yes
CD80_035889	3	120795177	CD80	Yes
rs2681417	3	123307887	CD86	Yes
rs1129055	3	123321009	CD86	Yes
rs17281995	3	123322331	CD86	Yes
rs2305619	3	158637555	PTX3	Yes
rs3845978	3	158642388	PTX3	Yes
rs3911403	3	158644821	PTX3	Yes
rs3921	4	77161967	CXCL10	Yes
rs4256246	4	77164546	CXCL10	Yes
rs230525	4	103677907	NFKB1	Yes
rs4648050	4	103733779	NFKB1	Yes
rs4648095	4	103746914	NFKB1	Yes
rs1049253	4	185785945	CASP3	Yes
rs2705897	4	185790092	CASP3	Yes
rs2720376	4	185791294	CASP3	Yes
rs2705901	4	185796481	CASP3	Yes
rs4647610	4	185804925	CASP3	Yes
rs2720378	4	185805107	CASP3	Yes
rs4647603	4	185806724	CASP3	Yes
rs3775296	4	187234761	TLR3	Yes
rs1879026	4	187237315	TLR3	Yes
rs3775291	4	187241068	TLR3	Yes
rs3775290	4	187241211	TLR3	Yes
rs2069187	5	54433806	GZMA	Yes
rs1051846	5	54439814	GZMA	Yes
rs839	5	131847025	IRF1	Yes
rs2070729	5	131847820	IRF1	Yes
rs17622656	5	131848896	IRF1	Yes
rs1800630	6	31650455	TNF	Yes
rs1800629	6	31651010	TNF	No
rs3093662	6	31652168	TNF	Yes
rs11914	6	137561281	IFNGR1	Yes
rs3799488	6	137561473	IFNGR1	Yes
rs1327474	6	137582768	IFNGR1	Yes
rs752637	7	128366656	IRF5	Yes
rs3807306	7	128367916	IRF5	Yes
rs1874328	7	128372340	IRF5	Yes
rs10108662	8	39899146	INDO	Yes
rs3739319	8	39904478	INDO	Yes
rs8993	8	71648639	TRAM1	No
rs268561	8	71656476	TRAM1	Yes
rs7011101	8	71664028	TRAM1	Yes
rs3816745	8	71669188	TRAM1	Yes
rs17686100	8	71669566	TRAM1	Yes
rs268594	8	71675684	TRAM1	Yes
rs268598	8	71677425	TRAM1	Yes
rs268600	8	71680925	TRAM1	Yes
rs10429491	9	5040706	JAK2	Yes
rs2230724	9	5071780	JAK2	Yes
rs12340866	9	5084185	JAK2	Yes
rs3780378	9	5102288	JAK2	Yes
rs3780379	9	5102519	JAK2	Yes
rs10815160	9	5106616	JAK2	Yes
rs822336	9	5438690	PDCD1L1	Yes
rs17742278	9	5446523	PDCD1L1	No
rs12002985	9	5446587	PDCD1L1	Yes
rs17804441	9	5447733	PDCD1L1	Yes
rs2297137	9	5455732	PDCD1L1	Yes
PDCD1L1_017464	9	5456085	PDCD1L	Yes
PDCD1L1_019180	9	5457801	PDCD1L1	Yes
rs2297136	9	5457955	PDCD1L1	Yes
rs4143815	9	5458257	PDCD1L1	Yes
rs16923189	9	5500644	PDCD1LG2	Yes
rs7854413	9	5547708	PDCD1LG2	Yes
rs7852996	9	5559860	PDCD1LG2	Yes
rs1364613	9	21066679	IFNB1	No
rs1051922	9	21067716	IFNB1	Yes
rs28383793	9	21430416	IFNA	Yes
rs12685904	9	21431310	IFNA	Yes
rs10985085	9	122705118	TRAF1	Yes
rs4836834	9	122705722	TRAF1	Yes
rs2239657	9	122711341	TRAF1	Yes
rs13440146	9	122721272	TRAF1	Yes
rs10824792	10	54196212	MBL2	Yes
rs10082466	10	54196628	MBL2	No
rs11595876	10	54196768	MBL2	Yes
rs930507	10	54198272	MBL2	Yes
rs1838066	10	54199331	MBL2	Yes
rs10824793	10	54199486	MBL2	Yes
rs4647964	10	54201105	MBL2	Yes
rs1800450	10	54201241	MBL2	Yes
rs1889490	10	72027719	PRF1	Yes
rs35069510	10	72032901	PRF1	Yes
rs1800682	10	90739943	FAS	Yes
rs2234978	10	90761809	FAS	Yes
rs1051070	10	90764752	FAS	Yes
rs17468739	10	91055929	IFIT2	Yes
rs2070845	10	91056055	IFIT2	Yes
rs954439	10	91056440	IFIT2	Yes
rs1727	10	91056749	IFIT2	Yes
rs303215	10	91146811	IFIT1	Yes
rs11203109	10	91147139	IFIT1	Yes
rs304485	10	91149890	IFIT1	Yes
rs303212	10	91151335	IFIT1	Yes
rs303211	10	91152477	IFIT1	Yes
rs3809112	11	297036	IFITM2	Yes
rs11246062	11	303755	IFITM1	Yes
rs3758650	11	606865	IRF7	Yes
rs731909	11	2365200	CD81	Yes
rs800335	11	2367517	CD81	Yes
rs3740961	11	36466647	TRAF6	Yes
rs331457	11	36480188	TRAF6	Yes
rs5030419	11	36487319	TRAF6	Yes
rs7127254	11	46265125	CREB3L1	Yes
rs6485672	11	46266544	CREB3L1	No
rs11038852	11	46270467	CREB3L1	Yes
rs4625425	11	46289469	CREB3L1	Yes
rs2288249	11	46290815	CREB3L1	Yes
rs4963271	11	63061760	RARRES3	Yes
rs1131715	11	69731135	FADD	Yes
rs7115875	11	75737878	PRKRIR	Yes
rs3824908	11	75754968	PRKRIR	Yes
rs7925910	11	75765047	PRKRIR	Yes
rs4320976	11	75765492	PRKRIR	Yes
rs4252249	11	117364419	IL10RA	Yes
rs2508450	11	117369039	IL10RA	Yes
rs3135932	11	117369273	IL10RA	Yes
rs4252314	11	117373727	IL10RA	Yes
rs2229113	11	117374880	IL10RA	Yes
rs2229114	11	117375088	IL10RA	No
rs9610	11	117377296	IL10RA	Yes
rs8177352	11	125659053	TIRAP	Yes
rs3802813	11	125667678	TIRAP	Yes
rs3802814	11	125667817	TIRAP	Yes
rs8177375	11	125668274	TIRAP	Yes
rs8177376	11	125668822	TIRAP	Yes
rs625413	11	125669559	TIRAP	Yes
rs1786704	11	125670967	TIRAP	Yes
rs17199006	12	7775618	CLEC4C	Yes
rs1894823	12	7781816	CLEC4C	Yes
rs10845821	12	7791451	CLEC4C	Yes
rs4251460	12	42449035	IRAK4	Yes
rs4251513	12	42460471	IRAK4	Yes
rs4251580	12	42461033	IRAK4	Yes
rs4251520	12	42461605	IRAK4	Yes
rs4251545	12	42466562	IRAK4	Yes
rs1544410	12	46526102	VDR	Yes
rs2066807	12	55026949	STAT2	Yes
rs7316037	12	63133078	TBK1	Yes
rs11175398	12	63137245	TBK1	Yes
rs10878175	12	63153605	TBK1	Yes
rs7303577	12	63160369	TBK1	Yes
rs2069727	12	66834490	IFNG	Yes
rs2069718	12	66836429	IFNG	Yes
rs2069716	12	66837082	IFNG	Yes
rs1861494	12	66837676	IFNG	Yes
rs10744785	12	111829639	OAS1	Yes
rs34137742	12	111833044	OAS1	Yes
rs3741981	12	111833253	OAS1	Yes
OAS1_004547	12	111833482	OAS1	Yes
rs10774671	12	111841576	OAS1	Yes
rs1859330	12	111860771	OAS3	Yes
rs7961861	12	111870301	OAS3	Yes
rs2285933	12	111871162	OAS3	Yes
rs2285932	12	111871333	OAS3	Yes
rs2072136	12	111883302	OAS3	Yes
OAS3_026920	12	111885590	OAS3	Yes
OAS3_029396	12	111888066	OAS3	Yes
rs2240188	12	111888067	OAS3	Yes
rs2010549	12	111893380	OAS3	Yes
rs2072133	12	111893643	OAS3	Yes
rs7138261	12	111894353	OAS3	Yes
rs2072138	12	111909276	OAS2	Yes
rs35992364	12	111917267	OAS2	Yes
rs1293755	12	111919833	OAS2	Yes
rs2072137	12	111925304	OAS2	Yes
rs929291	12	111928801	OAS2	Yes
rs916973	12	111931486	OAS2	Yes
rs15895	12	111932671	OAS2	Yes
rs13311	12	111933035	OAS2	Yes
rs1296371	12	111934088	OAS2	Yes
rs12819210	12	119942783	OASL	Yes
rs3213546	12	119955599	OASL	Yes
rs3213545	12	119955720	OASL	Yes
rs10774580	12	119960806	OASL	Yes
rs28360475	12	119961429	OASL	Yes
rs2236350	14	23700850	ISGF3G	Yes
rs12436555	14	23704665	ISGF3G	Yes
rs2236338	14	24170122	GZMB	Yes
rs11539752	14	24171429	GZMB	Yes
rs2273844	14	24173254	GZMB	Yes
rs7144366	14	24173502	GZMB	No
rs28489163	14	93645984	IFI27	Yes
IFI27_000630	14	93646335	IFI27	Yes
rs3814821	14	93646690	IFI27	Yes
rs2799	14	93652679	IFI27	Yes
IFI27_007273	14	93652978	IFI27	Yes
rs1243081	14	93653215	IFI27	Yes
rs7141881	14	93653617	IFI27	Yes
rs1243082	14	93653748	IFI27	Yes
rs10132928	14	93654162	IFI27	Yes
rs4780355	16	11255359	SOCS1	Yes
rs243330	16	11258492	SOCS1	Yes
rs3760396	17	29605554	CCL2	Yes
rs2857656	17	29606120	CCL2	Yes
rs4586	17	29607382	CCL2	Yes
rs1130371	17	31440650	CCL3	No
rs4969168	17	73865388	SOCS3	Yes
rs2292151	19	4767719	TICAM1	Yes
rs7255265	19	4769378	TICAM1	Yes
rs12609318	19	6614916	TNFSF14	Yes
rs1077667	19	6619972	TNFSF14	Yes
rs8106574	19	6622142	TNFSF14	Yes
rs8112310	19	7710320	CD209	Yes
rs4804800	19	7711128	CD209	No
rs4804801	19	7713482	CD209	Yes
rs4804802	19	7713610	CD209	Yes
rs8105572	19	7715327	CD209	Yes
rs11465384	19	7716006	CD209	Yes
rs2287886	19	7718536	CD209	Yes
rs735240	19	7719336	CD209	Yes
rs7252764	19	7733137	CLEC4M	Yes
rs2287887	19	7733955	CLEC4M	Yes
rs868876	19	7737226	CLEC4M	Yes
rs475896	19	7737429	CLEC4M	Yes
rs558705	19	7738183	CLEC4M	Yes
rs557094	19	7738286	CLEC4M	Yes
rs2161525	19	7738664	CLEC4M	Yes
rs8113469	19	7738959	CLEC4M	Yes
rs12610506	19	7739071	CLEC4M	Yes
rs3745376	19	7739690	CLEC4M	Yes
rs15282	19	7740274	CLEC4M	Yes
rs7251	19	54854721	IRF3	No
rs2304207	19	54859538	IRF3	Yes
rs2304204	19	54860832	IRF3	Yes
rs752118	20	44180145	CD40	Yes
rs745307	20	44180493	CD40	Yes
rs3765457	20	44190620	CD40	Yes
rs3765459	20	44190814	CD40	Yes
rs11569345	20	44191928	CD40	Yes
rs2143698	20	44192568	CD40	No
rs11569348	20	44192680	CD40	Yes
rs2226299	21	33620794	IFNAR1	Yes
rs2252930	21	33626071	IFNAR1	Yes
rs2252931	21	33626190	IFNAR1	Yes
rs17643419	21	33633668	IFNAR1	Yes
rs2253923	21	33634289	IFNAR1	Yes
rs2257167	21	33637569	IFNAR1	Yes
rs12483293	21	33638659	IFNAR1	Yes
rs2243600	21	33645531	IFNAR1	Yes
rs2834202	21	33652824	IFNAR1	Yes
rs9808753	21	33709182	IFNGR2	Yes
rs11910627	21	33721220	IFNGR2	Yes
rs1059293	21	33731563	IFNGR2	Yes
rs2071430	21	41719935	MX1	Yes
rs7280422	21	41723437	MX1	Yes
rs455599	21	41726549	MX1	Yes
rs457347	21	41726740	MX1	Yes
rs468672	21	41728034	MX1	Yes
rs2838036	21	41729610	MX1	Yes
rs8132871	21	41732690	MX1	Yes
rs467558	21	41733265	MX1	Yes
rs467960	21	41734761	MX1	Yes
rs469390	21	41739800	MX1	Yes
rs7277299	21	41740660	MX1	Yes
rs467639	21	41741434	MX1	Yes
rs2070229	21	41742983	MX1	Yes
rs469218	21	41743564	MX1	Yes
rs3737399	21	41745242	MX1	Yes
rs1050008	21	41746531	MX1	Yes
rs467798	21	41746744	MX1	No
rs467593	21	41748421	MX1	Yes
rs468811	21	41751716	MX1	Yes
rs1557370	21	41752560	MX1	No
rs13433394	21	41753780	MX1	Yes
rs4819387	21	44471630	ICOSLG	Yes
rs4819388	21	44471849	ICOSLG	Yes
ICOSLG_013933	21	44473308	ICOSLG	No
rs11558819	21	44481202	ICOSLG	Yes
rs378299	21	44485771	ICOSLG	Yes
rs179021	X	12799684	TLR7	Yes
rs1731479	X	12800374	TLR7	No
rs179016	X	12804363	TLR7	Yes
rs1638596	X	12806031	TLR7	Yes
rs179014	X	12809686	TLR7	Yes
rs179012	X	12811483	TLR7	Yes
rs179010	X	12812806	TLR7	Yes
rs179008	X	12813580	TLR7	Yes
rs864058	X	12815951	TLR7	Yes
rs5741883	X	12834142	TLR8	Yes
rs3764880	X	12834747	TLR8	Yes
rs17256081	X	12835966	TLR8	Yes
rs2109134	X	12837107	TLR8	Yes
rs1548731	X	12837868	TLR8	No
rs2159377	X	12847434	TLR8	Yes
rs5744080	X	12847725	TLR8	Yes
rs2407992	X	12849033	TLR8	Yes
rs5744088	X	12850485	TLR8	Yes
rs12846646	X	23710457	SAT1	Yes
rs3764885	X	23711514	SAT1	Yes
rs873637	X	23714792	SAT1	Yes
rs2280964	X	70754779	CXCR3	Yes
rs3092946	X	135557269	CD40LG	Yes
rs1126535	X	135558221	CD40LG	Yes
rs3092921	X	135570666	CD40LG	Yes
