# Supplementary material for: Host Genetic Risk Factors for West Nile Virus Infection and Disease Progression
Source: PLoS One. 2011 Sep 15;6(9):e24745. doi: 10.1371/journal.pone.0024745 (PMC3174177; doi:10.1371/journal.pone.0024745)
Supplement: Table S2 — Symptomatic vs. asymptomatic genotypic contingency table analysis. (XLS) [file pone.0024745.s002.xls]

## Sheet: Sheet1
Table S2. Symptomatic vs. asymptomatic genotypic contingency table analysis. Genotypic frequency differences between symptomatic and asymptomatic infection were calculated a using 3 x 2 contingency table analysis. Two sided p-values were estimated by the chi-sqaure test of significance with 2 degrees of freedom. P-values were corrected for multiple tests using the Bonferroni correction.
SNP	CHR	Position	Gene	D (minor Allele)	d (major Allele)	TEST	Symptomatic			Asymptomatic			n	CHISQ	DF	P-value	Bonferroni P-Value
							DD	Dd	dd	DD	Dd	dd
rs2254002	1	65074257	JAK1	T	G	GENO	66	185	170	47	152	131	751	0.4594	2	0.7948	267.848
rs4916004	1	65076098	JAK1	A	G	GENO	6	68	346	1	42	287	750	4.481	2	0.1064	35.8568
rs310244	1	65078465	JAK1	T	C	GENO	14	139	266	16	118	197	750	1.832	2	0.4001	134.834
rs310247	1	65079997	JAK1	T	C	GENO	92	196	132	62	171	97	750	2.127	2	0.3452	116.332
rs2230587	1	65083850	JAK1	T	C	GENO	11	87	323	4	64	263	752	2.173	2	0.3374	113.704
rs10789166	1	65085401	JAK1	G	A	GENO	11	91	319	14	72	245	752	1.535	2	0.4643	156.469
rs310219	1	65087886	JAK1	T	C	GENO	27	156	235	24	131	176	749	0.7281	2	0.6949	234.181
rs188698	1	65091172	JAK1	C	T	GENO	42	185	194	34	155	142	752	0.7766	2	0.6782	228.553
rs2256298	1	65103270	JAK1	T	C	GENO	29	161	227	19	138	171	745	1.116	2	0.5724	192.899
rs11585932	1	65107683	JAK1	G	A	GENO	1	59	355	2	41	287	745	1.092	2	0.5792	195.19
rs12135754	1	65115093	JAK1	C	A	GENO	6	64	352	1	42	287	752	3.547	2	0.1697	57.1889
rs310201	1	65122196	JAK1	C	T	GENO	30	150	241	18	113	200	752	1.264	2	0.5315	179.115
rs310199	1	65122710	JAK1	C	T	GENO	49	178	194	27	141	163	752	2.618	2	0.2701	91.0237
rs310198	1	65123656	JAK1	A	G	GENO	5	86	329	8	66	256	750	1.657	2	0.4367	147.168
rs10802189	1	116858253	CD58	A	G	GENO	47	187	186	40	134	154	748	1.026	2	0.5988	201.796
rs17036001	1	116916652	CD58	A	G	GENO	1	45	369	0	38	292	745	0.8735	2	0.6461	217.736
rs1335531	1	116916900	CD58	G	C	GENO	29	153	234	16	144	170	746	4.31	2	0.1159	39.0583
rs6701046	1	117099257	CD2	G	A	GENO	20	150	250	15	115	198	748	0.05801	2	0.9714	327.362
rs3136705	1	117104923	CD2	A	G	GENO	6	89	326	9	68	254	752	1.598	2	0.4497	151.549
rs798043	1	117105020	CD2	T	C	GENO	23	162	236	15	123	193	752	0.5679	2	0.7528	253.694
rs1801274	1	159746369	FCGR2A	T	C	GENO	100	214	107	98	129	104	752	10.51	2	0.005231	1.76285
rs627839	1	180808704	RNASEL	A	C	GENO	88	215	116	68	172	91	750	0.03637	2	0.982	330.934
rs11072	1	180809954	RNASEL	C	T	GENO	36	180	203	31	148	150	748	0.6329	2	0.7287	245.572
rs672527	1	180811844	RNASEL	A	G	GENO	34	163	224	24	135	171	751	0.4463	2	0.8	269.6
rs533259	1	180815642	RNASEL	T	C	GENO	4	47	367	0	25	306	749	6.23	2	0.04438	14.9561
rs627928	1	180817960	RNASEL	T	G	GENO	85	199	138	83	151	97	753	2.803	2	0.2462	82.9694
rs486907	1	180821180	RNASEL	T	C	GENO	54	188	180	35	157	139	753	1.13	2	0.5682	191.483
rs3024498	1	205008152	IL10	C	T	GENO	28	156	232	17	127	187	747	0.8323	2	0.6596	222.285
rs3024496	1	205008487	IL10	C	T	GENO	99	206	113	78	157	96	749	0.3884	2	0.8235	277.519
rs3024509	1	205009920	IL10	C	T	GENO	1	43	378	0	47	281	750	3.733	2	0.1547	52.1339
rs3021094	1	205011575	IL10	G	T	GENO	3	79	340	2	52	277	753	1.218	2	0.5439	183.294
rs1800871	1	205013257	IL10	T	C	GENO	25	153	240	24	112	195	749	0.926	2	0.6294	212.108
rs1800896	1	205013520	IL10	C	T	GENO	101	201	118	77	160	94	751	0.06306	2	0.969	326.553
rs3770768	2	37199655	EIF2AK2	T	C	GENO	9	77	334	10	60	261	751	0.5793	2	0.7485	252.245
rs4648212	2	37206515	EIF2AK2	T	C	GENO	2	45	373	0	33	296	749	1.677	2	0.4323	145.685
rs4670185	2	37209038	EIF2AK2	G	A	GENO	4	44	373	1	35	295	752	1.179	2	0.5547	186.934
rs4648186	2	37220611	EIF2AK2	T	C	GENO	12	92	316	7	79	244	750	0.7724	2	0.6796	229.025
rs4648184	2	37220999	EIF2AK2	A	T	GENO	0	31	391	0	16	315	753	NA	NA	NA	NA
rs2373114	2	37226754	EIF2AK2	A	G	GENO	7	66	346	0	38	291	748	8.583	2	0.01369	4.61353
rs2254958	2	37229795	EIF2AK2	T	C	GENO	66	206	145	53	165	112	747	0.05676	2	0.972	327.564
rs12712526	2	37236819	EIF2AK2	G	A	GENO	103	198	111	66	164	100	742	2.84	2	0.2417	81.4529
rs7340267	2	37237964	EIF2AK2	G	A	GENO	103	198	108	67	164	100	740	2.936	2	0.2304	77.6448
rs1990760	2	162832297	IFIH1	G	A	GENO	68	205	147	53	182	96	751	3.431	2	0.1799	60.6263
rs3747517	2	162837070	IFIH1	T	C	GENO	34	165	221	24	153	154	751	3.652	2	0.1611	54.2907
rs13023380	2	162862609	IFIH1	A	G	GENO	122	189	107	75	157	98	748	4.274	2	0.118	39.766
rs17715343	2	162875992	IFIH1	G	C	GENO	2	54	365	0	59	272	752	5.101	2	0.07805	26.3028
rs2059691	2	179010130	PRKRA	A	G	GENO	25	176	220	36	147	147	751	8.202	2	0.01656	5.58072
rs2288320	2	179016748	PRKRA	C	A	GENO	9	130	281	10	98	221	749	0.669	2	0.7157	241.191
rs3752689	2	179020859	PRKRA	G	A	GENO	18	145	253	12	106	213	747	1.035	2	0.5961	200.886
rs3771300	2	191543841	STAT1	G	T	GENO	98	203	119	94	161	76	751	3.919	2	0.1409	47.4833
rs2066804	2	191550004	STAT1	T	C	GENO	22	148	250	20	111	200	751	0.3948	2	0.8209	276.643
rs12693591	2	191568747	STAT1	A	C	GENO	11	101	310	9	77	245	753	0.05198	2	0.9743	328.339
rs10173099	2	191575577	STAT1	A	G	GENO	51	182	189	38	166	127	753	3.858	2	0.1453	48.9661
rs1879877	2	204278245	CD28	T	G	GENO	33	149	239	27	120	182	750	0.1608	2	0.9227	310.95
rs3181096	2	204278337	CD28	A	G	GENO	65	155	177	46	137	141	721	1.057	2	0.5895	198.662
rs3116494	2	204300266	CD28	G	A	GENO	30	167	224	18	130	183	752	0.9824	2	0.6119	206.21
rs16840252	2	204439764	CTLA4	A	G	GENO	12	120	289	10	80	240	751	1.719	2	0.4233	142.652
rs11571317	2	204440253	CTLA4	A	G	GENO	3	67	352	4	52	275	753	0.4997	2	0.7789	262.489
rs5742909	2	204440592	CTLA4	A	G	GENO	3	68	348	4	54	272	749	0.4971	2	0.7799	262.826
rs41265961	2	204444106	CTLA4	A	G	GENO	0	31	390	2	30	299	752	3.311	2	0.191	64.367
rs11883722	2	204509090	ICOS	A	G	GENO	18	133	261	16	106	207	741	0.103	2	0.9498	320.083
rs4264550	2	204529739	ICOS	A	G	GENO	5	103	312	4	80	247	751	0.01287	2	0.9936	334.843
rs10183087	2	204532569	ICOS	C	A	GENO	23	169	229	14	132	185	752	0.6517	2	0.7219	243.28
rs10932035	2	204532897	ICOS	A	G	GENO	6	80	336	1	66	264	753	2.594	2	0.2733	92.1021
rs6705653	2	242442232	PDCD1	T	C	GENO	77	198	139	58	166	105	743	0.5075	2	0.7759	261.478
PDCD1_008885	2	242442870	PCDC1	C	G	GENO	1	37	377	0	26	302	743	1.032	2	0.5969	201.155
rs7419333	2	242443985	PDCD1	G	C	GENO	49	182	180	29	156	146	742	2.073	2	0.3547	119.534
rs4988457	3	38157140	MYD88	G	C	GENO	1	46	372	1	25	304	749	2.512	2	0.2849	96.0113
rs7744	3	38159025	MYD88	G	A	GENO	6	113	303	13	88	230	753	4.759	2	0.09261	31.2096
rs6853	3	38159374	MYD88	G	A	GENO	7	103	312	3	64	264	753	3.765	2	0.1522	51.2914
rs1799988	3	46387263	CCR5	A	G	GENO	76	207	133	64	176	89	745	2.128	2	0.3451	116.299
rs352140	3	52231737	TLR9	G	A	GENO	100	200	119	79	163	89	750	0.2399	2	0.887	298.919
rs187084	3	52236071	TLR9	C	T	GENO	72	197	150	64	143	124	750	1.205	2	0.5473	184.44
rs17281703	3	120726239	CD80	A	G	GENO	7	73	339	6	64	261	750	0.4896	2	0.7829	263.837
rs1599796	3	120726624	CD80	A	G	GENO	16	134	271	14	103	212	750	0.1116	2	0.9457	318.701
rs7628626	3	120727111	CD80	A	C	GENO	19	132	271	7	94	230	753	4.349	2	0.1136	38.2832
rs2629396	3	120731657	CD80	G	T	GENO	71	209	141	54	159	118	752	0.3821	2	0.8261	278.396
rs2228017	3	120746370	CD80	A	G	GENO	36	156	229	26	135	170	752	1.097	2	0.5778	194.719
rs9282638	3	120746460	CD80	C	T	GENO	10	108	304	11	73	246	752	1.702	2	0.427	143.899
rs16829980	3	120761158	CD80	G	A	GENO	7	90	318	1	66	264	746	3.792	2	0.1501	50.5837
rs16829984	3	120761230	CD80	C	G	GENO	7	83	329	5	67	259	750	0.04867	2	0.976	328.912
rs1880661	3	120761538	CD80	T	C	GENO	103	195	123	61	157	113	752	4.576	2	0.1015	34.2055
CD80_035889	3	120795177	CD80	A	G	GENO	14	126	279	23	93	215	750	5.2	2	0.07429	25.0357
rs2681417	3	123307887	CD86	G	A	GENO	4	60	358	0	45	286	753	3.243	2	0.1976	66.5912
rs1129055	3	123321009	CD86	A	G	GENO	32	155	234	16	131	183	751	2.596	2	0.273	92.001
rs17281995	3	123322331	CD86	G	C	GENO	4	130	288	7	79	245	753	5.82	2	0.05448	18.3598
rs2305619	3	158637555	PTX3	A	G	GENO	102	191	123	72	162	97	747	0.9681	2	0.6163	207.693
rs3845978	3	158642388	PTX3	A	G	GENO	0	38	383	1	28	301	751	1.339	2	0.5121	172.578
rs3911403	3	158644821	PTX3	T	A	GENO	4	55	360	3	32	295	749	2.128	2	0.345	116.265
rs3921	4	77161967	CXCL10	C	G	GENO	81	227	110	63	193	75	749	1.539	2	0.4632	156.098
rs4256246	4	77164546	CXCL10	A	G	GENO	11	117	291	7	93	231	750	0.2058	2	0.9022	304.041
rs230525	4	103677907	NFKB1	G	A	GENO	48	174	198	27	151	153	751	2.769	2	0.2505	84.4185
rs4648050	4	103733779	NFKB1	G	A	GENO	46	178	194	24	144	163	749	3.133	2	0.2088	70.3656
rs4648095	4	103746914	NFKB1	G	A	GENO	1	43	378	0	30	300	752	1.049	2	0.5919	199.47
rs1049253	4	185785945	CASP3	C	T	GENO	13	130	276	15	96	220	750	1.273	2	0.5292	178.34
rs2705897	4	185790092	CASP3	A	C	GENO	31	169	219	21	149	161	750	1.732	2	0.4206	141.742
rs2720376	4	185791294	CASP3	G	A	GENO	83	233	104	75	169	87	751	1.582	2	0.4534	152.796
rs2705901	4	185796481	CASP3	G	C	GENO	11	109	301	7	103	221	752	2.585	2	0.2746	92.5402
rs4647610	4	185804925	CASP3	T	C	GENO	7	106	308	6	84	241	752	0.03013	2	0.985	331.945
rs2720378	4	185805107	CASP3	C	G	GENO	33	194	185	30	143	156	741	1.043	2	0.5935	200.01
rs4647603	4	185806724	CASP3	T	C	GENO	10	110	284	3	100	223	730	3.288	2	0.1932	65.1084
rs3775296	4	187234761	TLR3	T	G	GENO	24	119	279	10	112	209	753	5.095	2	0.07828	26.3804
rs1879026	4	187237315	TLR3	T	G	GENO	11	125	284	7	97	227	751	0.2346	2	0.8893	299.694
rs3775291	4	187241068	TLR3	T	C	GENO	34	156	229	29	137	165	750	1.723	2	0.4225	142.382
rs3775290	4	187241211	TLR3	T	C	GENO	45	176	201	29	146	156	753	0.9432	2	0.624	210.288
rs2069187	5	54433806	GZMA	C	T	GENO	9	108	305	13	66	251	752	4.928	2	0.08508	28.672
rs1051846	5	54439814	GZMA	C	G	GENO	3	100	319	3	63	264	752	2.368	2	0.3061	103.156
rs839	5	131847025	IRF1	T	C	GENO	55	183	143	24	157	140	702	9.123	2	0.01045	3.52165
rs2070729	5	131847820	IRF1	T	G	GENO	95	197	124	47	170	112	745	8.782	2	0.01239	4.17543
rs17622656	5	131848896	IRF1	A	G	GENO	54	181	183	46	163	119	746	4.35	2	0.1136	38.2832
rs1800630	6	31650455	TNF	A	C	GENO	15	98	306	5	97	226	747	6.039	2	0.04882	16.4523
rs3093662	6	31652168	TNF	G	A	GENO	0	70	347	2	52	275	746	2.646	2	0.2663	89.7431
rs11914	6	137561281	IFNGR1	G	T	GENO	12	107	300	7	106	218	750	4.031	2	0.1332	44.8884
rs3799488	6	137561473	IFNGR1	G	A	GENO	7	106	308	14	76	240	751	4.76	2	0.09257	31.1961
rs1327474	6	137582768	IFNGR1	C	T	GENO	82	210	127	62	168	98	747	0.098	2	0.9522	320.891
rs752637	7	128366656	IRF5	T	C	GENO	60	210	147	50	159	122	748	0.3989	2	0.8192	276.07
rs3807306	7	128367916	IRF5	T	G	GENO	86	226	105	62	162	107	748	4.641	2	0.09822	33.1001
rs1874328	7	128372340	IRF5	C	T	GENO	55	182	183	34	152	144	750	1.523	2	0.467	157.379
rs10108662	8	39899146	INDO	A	C	GENO	47	192	181	35	157	138	750	0.2662	2	0.8754	295.01
rs3739319	8	39904478	INDO	A	G	GENO	73	198	150	42	161	128	752	3.185	2	0.2034	68.5458
rs268561	8	71656476	TRAM1	G	A	GENO	45	168	209	38	144	147	751	1.744	2	0.418	140.866
rs7011101	8	71664028	TRAM1	C	A	GENO	5	97	318	5	67	259	751	0.9873	2	0.6104	205.705
rs3816745	8	71669188	TRAM1	C	G	GENO	64	204	154	54	156	120	752	0.2143	2	0.8984	302.761
rs17686100	8	71669566	TRAM1	G	A	GENO	4	67	351	1	35	295	753	5.781	2	0.05555	18.7203
rs268594	8	71675684	TRAM1	A	G	GENO	36	181	203	23	127	178	748	2.698	2	0.2595	87.4515
rs268598	8	71677425	TRAM1	G	A	GENO	3	63	354	1	63	267	751	2.679	2	0.262	88.294
rs268600	8	71680925	TRAM1	G	A	GENO	1	41	352	0	38	286	718	1.128	2	0.569	191.753
rs10429491	9	5040706	JAK2	A	G	GENO	28	179	214	29	124	177	751	2.513	2	0.2847	95.9439
rs2230724	9	5071780	JAK2	G	A	GENO	101	215	104	78	173	79	750	0.1187	2	0.9424	317.589
rs12340866	9	5084185	JAK2	A	G	GENO	22	171	228	25	120	183	749	2.549	2	0.2796	94.2252
rs3780378	9	5102288	JAK2	G	A	GENO	97	222	99	71	176	83	748	0.3996	2	0.8189	275.969
rs3780379	9	5102519	JAK2	A	G	GENO	15	140	261	10	119	202	747	0.5562	2	0.7572	255.176
rs10815160	9	5106616	JAK2	C	A	GENO	35	158	226	14	150	167	750	7.848	2	0.01976	6.65912
rs822336	9	5438690	PDCD1L1	G	C	GENO	90	217	112	66	180	85	750	0.523	2	0.7699	259.456
rs12002985	9	5446587	PDCD1L1	G	C	GENO	98	198	125	78	148	105	752	0.4728	2	0.7895	266.061
rs17804441	9	5447733	PDCD1L1	G	A	GENO	25	134	261	19	132	180	751	5.237	2	0.07291	24.5707
rs2297137	9	5455732	PDCD1L1	T	C	GENO	19	144	253	15	113	193	737	0.03666	2	0.9818	330.867
PDCD1L1_017464	9	5456085	PDCD1L	G	A	GENO	20	131	269	18	132	180	750	7.052	2	0.02942	9.91454
PDCD1L1_019180	9	5457801	PDCD1L1	A	G	GENO	3	39	380	0	37	294	753	3.073	2	0.2151	72.4887
rs2297136	9	5457955	PDCD1L1	C	T	GENO	116	200	104	74	152	105	751	5.362	2	0.06848	23.0778
rs4143815	9	5458257	PDCD1L1	C	G	GENO	30	170	219	29	146	154	748	2.372	2	0.3054	102.92
rs16923189	9	5500644	PDCD1LG2	G	A	GENO	33	176	213	30	166	133	751	7.531	2	0.02315	7.80155
rs7854413	9	5547708	PDCD1LG2	G	A	GENO	7	77	337	8	58	265	752	0.5892	2	0.7448	250.998
rs7852996	9	5559860	PDCD1LG2	T	A	GENO	6	73	342	7	58	264	750	0.5571	2	0.7569	255.075
rs1051922	9	21067716	IFNB1	T	C	GENO	44	205	172	32	155	143	751	0.4896	2	0.7829	263.837
rs28383793	9	21430416	IFNA	G	A	GENO	1	39	382	0	21	310	753	2.937	2	0.2303	77.6111
rs12685904	9	21431310	IFNA	C	A	GENO	1	17	401	1	17	313	750	0.5279	2	0.768	258.816
rs10985085	9	122705118	TRAF1	A	G	GENO	1	54	366	0	37	294	752	1.277	2	0.528	177.936
rs4836834	9	122705722	TRAF1	T	A	GENO	87	203	132	59	169	103	753	1.074	2	0.5844	196.943
rs2239657	9	122711341	TRAF1	G	A	GENO	57	182	176	46	148	135	744	0.144	2	0.9305	313.579
rs13440146	9	122721272	TRAF1	A	C	GENO	3	55	355	2	43	284	742	0.04948	2	0.9756	328.777
rs10824792	10	54196212	MBL2	G	A	GENO	75	200	146	50	153	126	750	1.465	2	0.4807	161.996
rs11595876	10	54196768	MBL2	G	A	GENO	3	54	365	2	39	290	753	0.2129	2	0.899	302.963
rs930507	10	54198272	MBL2	G	C	GENO	11	122	287	12	83	235	750	1.87	2	0.3926	132.306
rs1838066	10	54199331	MBL2	G	A	GENO	58	192	172	45	169	116	752	2.781	2	0.2489	83.8793
rs10824793	10	54199486	MBL2	G	A	GENO	98	196	128	59	168	103	752	3.342	2	0.1881	63.3897
rs4647964	10	54201105	MBL2	G	G	GENO	0	0	400	0	0	318	718	NA	NA	NA	NA
rs1800450	10	54201241	MBL2	T	C	GENO	7	93	322	7	67	257	753	0.5325	2	0.7662	258.209
rs1889490	10	72027719	PRF1	T	C	GENO	68	197	155	63	169	97	749	4.695	2	0.09559	32.2138
rs35069510	10	72032901	PRF1	T	C	GENO	1	69	350	5	46	276	747	4.506	2	0.1051	35.4187
rs1800682	10	90739943	FAS	C	T	GENO	99	189	130	67	150	113	748	1.513	2	0.4694	158.188
rs2234978	10	90761809	FAS	A	G	GENO	35	165	219	34	115	181	749	2.006	2	0.3668	123.612
rs1051070	10	90764752	FAS	T	A	GENO	3	77	336	1	60	269	746	0.6234	2	0.7322	246.751
rs17468739	10	91055929	IFIT2	C	A	GENO	9	119	291	12	116	202	749	6.044	2	0.04871	16.4153
rs2070845	10	91056055	IFIT2	G	A	GENO	27	163	230	24	133	174	751	0.4383	2	0.8032	270.678
rs954439	10	91056440	IFIT2	T	A	GENO	79	189	124	80	162	78	712	5.332	2	0.06953	23.4316
rs1727	10	91056749	IFIT2	C	A	GENO	26	143	250	25	127	179	750	2.426	2	0.2972	100.156
rs303215	10	91146811	IFIT1	G	A	GENO	21	132	269	13	93	224	752	1.517	2	0.4683	157.817
rs11203109	10	91147139	IFIT1	G	A	GENO	33	172	215	31	130	170	751	0.6248	2	0.7317	246.583
rs304485	10	91149890	IFIT1	A	T	GENO	86	204	130	76	164	90	750	1.459	2	0.4822	162.501
rs303212	10	91151335	IFIT1	G	A	GENO	33	160	228	22	110	199	752	2.696	2	0.2597	87.5189
rs303211	10	91152477	IFIT1	A	G	GENO	1	38	382	0	28	303	752	0.8672	2	0.6482	218.443
rs3809112	11	297036	IFITM2	G	A	GENO	82	171	168	42	136	150	749	6.465	2	0.03947	13.3014
rs11246062	11	303755	IFITM1	G	C	GENO	42	180	196	29	130	172	749	1.931	2	0.3809	128.363
rs3758650	11	606865	IRF7	A	G	GENO	1	32	376	2	36	292	739	2.717	2	0.257	86.609
rs731909	11	2365200	CD81	C	G	GENO	9	104	307	8	83	239	750	0.08723	2	0.9573	322.61
rs800335	11	2367517	CD81	G	A	GENO	13	141	261	17	94	219	745	3.962	2	0.1379	46.4723
rs3740961	11	36466647	TRAF6	C	T	GENO	10	89	321	6	71	254	751	0.2887	2	0.8656	291.707
rs331457	11	36480188	TRAF6	T	C	GENO	2	103	314	8	80	242	749	5.314	2	0.07016	23.6439
rs5030419	11	36487319	TRAF6	G	C	GENO	11	95	312	0	65	265	748	10.24	2	0.005969	2.01155
rs7127254	11	46265125	CREB3L1	A	G	GENO	27	139	255	14	130	187	752	4.173	2	0.1241	41.8217
rs11038852	11	46270467	CREB3L1	G	C	GENO	39	158	223	24	144	162	750	3.13	2	0.209	70.433
rs4625425	11	46289469	CREB3L1	C	A	GENO	11	114	294	10	107	214	750	2.578	2	0.2756	92.8772
rs2288249	11	46290815	CREB3L1	A	G	GENO	2	61	356	0	36	295	750	3.887	2	0.1432	48.2584
rs4963271	11	63061760	RARRES3	G	A	GENO	18	142	260	10	92	228	750	4.33	2	0.1147	38.6539
rs1131715	11	69731135	FADD	G	A	GENO	65	213	141	66	164	101	750	2.7	2	0.2593	87.3841
rs7115875	11	75737878	PRKRIR	G	A	GENO	2	94	321	6	62	260	745	4.399	2	0.1109	37.3733
rs3824908	11	75754968	PRKRIR	C	A	GENO	19	154	248	18	122	190	751	0.3967	2	0.8201	276.374
rs7925910	11	75765047	PRKRIR	G	A	GENO	5	117	298	5	88	236	749	0.2485	2	0.8831	297.605
rs4320976	11	75765492	PRKRIR	A	G	GENO	9	124	289	12	104	214	752	2.143	2	0.3426	115.456
rs4252249	11	117364419	IL10RA	A	G	GENO	4	82	331	6	60	264	747	1.237	2	0.5387	181.542
rs2508450	11	117369039	IL10RA	A	G	GENO	72	216	134	71	165	95	753	2.515	2	0.2844	95.8428
rs3135932	11	117369273	IL10RA	G	A	GENO	5	125	291	15	79	237	752	10.27	2	0.005884	1.98291
rs4252314	11	117373727	IL10RA	G	A	GENO	0	29	392	0	18	313	752	NA	NA	NA	NA
rs2229113	11	117374880	IL10RA	A	G	GENO	30	193	197	48	138	143	749	10.98	2	0.004138	1.39451
rs9610	11	117377296	IL10RA	A	G	GENO	84	216	122	66	162	103	753	0.4885	2	0.7833	263.972
rs8177352	11	125659053	TIRAP	G	A	GENO	12	142	254	21	91	219	739	8.274	2	0.01597	5.38189
rs3802813	11	125667678	TIRAP	A	G	GENO	0	38	383	0	25	305	751	NA	NA	NA	NA
rs3802814	11	125667817	TIRAP	A	G	GENO	6	116	298	16	72	243	751	10.03	2	0.006643	2.23869
rs8177375	11	125668274	TIRAP	G	A	GENO	2	90	329	5	75	251	752	2.402	2	0.3009	101.403
rs8177376	11	125668822	TIRAP	C	A	GENO	17	147	256	27	109	195	751	5.697	2	0.05794	19.5258
rs625413	11	125669559	TIRAP	A	G	GENO	26	141	254	13	109	209	752	2.061	2	0.3568	120.242
rs1786704	11	125670967	TIRAP	G	A	GENO	29	126	266	16	106	208	751	1.573	2	0.4554	153.47
rs17199006	12	7775618	CLEC4C	G	A	GENO	13	102	306	5	103	223	752	5.896	2	0.05244	17.6723
rs1894823	12	7781816	CLEC4C	A	G	GENO	25	149	246	28	135	167	750	5.247	2	0.07255	24.4494
rs10845821	12	7791451	CLEC4C	A	G	GENO	71	192	157	45	163	123	751	1.803	2	0.4059	136.788
rs4251460	12	42449035	IRAK4	C	A	GENO	10	87	322	7	49	275	750	4.585	2	0.101	34.037
rs4251513	12	42460471	IRAK4	G	C	GENO	110	210	100	65	177	89	751	4.542	2	0.1032	34.7784
rs4251580	12	42461033	IRAK4	A	G	GENO	6	93	321	5	81	244	750	0.6212	2	0.733	247.021
rs4251520	12	42461605	IRAK4	G	A	GENO	8	77	334	4	60	266	749	0.5823	2	0.7474	251.874
rs4251545	12	42466562	IRAK4	A	G	GENO	6	76	336	5	46	280	749	2.487	2	0.2884	97.1908
rs1544410	12	46526102	VDR	T	C	GENO	65	189	166	59	149	123	751	0.8872	2	0.6417	216.253
rs2066807	12	55026949	STAT2	G	C	GENO	4	70	347	3	51	277	752	0.2106	2	0.9	303.3
rs7316037	12	63133078	TBK1	A	G	GENO	6	72	334	1	45	281	739	4.655	2	0.09756	32.8777
rs11175398	12	63137245	TBK1	G	A	GENO	87	190	140	74	177	79	747	8.484	2	0.01438	4.84606
rs10878175	12	63153605	TBK1	C	G	GENO	41	135	241	14	133	184	748	11.17	2	0.003746	1.2624
rs7303577	12	63160369	TBK1	C	A	GENO	6	75	341	7	88	236	753	9.361	2	0.009276	3.12601
rs2069727	12	66834490	IFNG	C	T	GENO	83	196	138	62	171	98	748	1.658	2	0.4364	147.067
rs2069718	12	66836429	IFNG	T	C	GENO	82	201	138	61	155	115	752	0.3524	2	0.8384	282.541
rs2069716	12	66837082	IFNG	C	T	GENO	1	45	374	0	43	287	750	1.721	2	0.4229	142.517
rs1861494	12	66837676	IFNG	G	A	GENO	43	162	214	37	122	171	749	0.3154	2	0.8541	287.832
rs10744785	12	111829639	OAS1	G	C	GENO	29	133	257	13	119	197	748	4.032	2	0.1332	44.8884
rs34137742	12	111833044	OAS1	A	G	GENO	13	88	299	8	91	225	724	3.755	2	0.153	51.561
rs3741981	12	111833253	OAS1	G	A	GENO	83	210	127	56	160	115	751	2.078	2	0.3538	119.231
OAS1_004547	12	111833482	OAS1	A	G	GENO	0	57	361	2	45	279	744	2.581	2	0.2751	92.7087
rs10774671	12	111841576	OAS1	G	A	GENO	59	198	163	37	150	144	751	2.324	2	0.3129	105.447
rs1859330	12	111860771	OAS3	C	T	GENO	58	192	155	35	145	145	730	3.856	2	0.1455	49.0335
rs7961861	12	111870301	OAS3	G	A	GENO	107	183	123	90	136	102	741	0.6095	2	0.7373	248.47
rs2285933	12	111871162	OAS3	G	C	GENO	42	158	221	24	129	178	752	1.727	2	0.4217	142.113
rs2285932	12	111871333	OAS3	T	C	GENO	44	187	189	31	136	163	750	1.447	2	0.485	163.445
rs2072136	12	111883302	OAS3	T	C	GENO	20	150	252	22	115	194	753	1.282	2	0.5268	177.532
OAS3_026920	12	111885590	OAS3	A	G	GENO	13	82	323	8	91	227	744	7.148	2	0.02804	9.44948
OAS3_029396	12	111888066	OAS3	A	G	GENO	57	143	206	39	120	170	735	0.7751	2	0.6787	228.722
rs2240188	12	111888067	OAS3	T	C	GENO	48	155	206	33	122	170	734	0.5501	2	0.7595	255.951
rs2010549	12	111893380	OAS3	G	C	GENO	16	133	269	17	99	214	748	0.936	2	0.6262	211.029
rs2072133	12	111893643	OAS3	C	T	GENO	13	106	302	20	99	211	751	6.941	2	0.03109	10.4773
rs7138261	12	111894353	OAS3	A	G	GENO	1	50	337	1	43	277	709	0.05915	2	0.9709	327.193
rs2072138	12	111909276	OAS2	C	G	GENO	39	163	218	24	139	167	750	1.456	2	0.483	162.771
rs35992364	12	111917267	OAS2	G	A	GENO	9	90	323	20	65	246	753	7.74	2	0.02085	7.02645
rs1293755	12	111919833	OAS2	T	A	GENO	32	184	203	31	126	174	750	2.812	2	0.2452	82.6324
rs2072137	12	111925304	OAS2	C	T	GENO	76	196	149	53	166	111	751	1.131	2	0.5681	191.45
rs929291	12	111928801	OAS2	T	C	GENO	36	193	191	31	126	169	746	4.009	2	0.1347	45.3939
rs916973	12	111931486	OAS2	C	T	GENO	5	54	363	5	40	281	748	0.2087	2	0.9009	303.603
rs15895	12	111932671	OAS2	T	C	GENO	45	197	180	42	135	154	753	2.749	2	0.253	85.261
rs13311	12	111933035	OAS2	A	C	GENO	61	193	167	41	167	122	751	1.806	2	0.4053	136.586
rs1296371	12	111934088	OAS2	C	T	GENO	18	148	242	20	121	181	730	1.501	2	0.4721	159.098
rs12819210	12	119942783	OASL	A	G	GENO	20	139	263	9	92	230	753	5.02	2	0.08126	27.3846
rs3213546	12	119955599	OASL	C	G	GENO	0	23	398	0	16	315	752	NA	NA	NA	NA
rs3213545	12	119955720	OASL	T	C	GENO	20	163	236	29	135	166	749	5.982	2	0.05024	16.9309
rs10774580	12	119960806	OASL	A	G	GENO	63	211	147	50	184	96	751	3.063	2	0.2162	72.8594
rs28360475	12	119961429	OASL	G	A	GENO	21	154	245	20	82	228	750	11.97	2	0.002511	0.846207
rs2236350	14	23700850	ISGF3G	T	G	GENO	7	80	331	2	64	264	748	1.772	2	0.4124	138.979
rs12436555	14	23704665	ISGF3G	A	G	GENO	13	119	286	13	80	237	748	1.907	2	0.3853	129.846
rs2236338	14	24170122	GZMB	G	A	GENO	21	145	254	17	93	220	750	3.471	2	0.1763	59.4131
rs11539752	14	24171429	GZMB	C	G	GENO	16	146	257	18	101	211	749	2.294	2	0.3175	106.998
rs2273844	14	24173254	GZMB	A	G	GENO	18	145	258	19	100	212	752	2.053	2	0.3583	120.747
rs28489163	14	93645984	IFI27	A	G	GENO	9	107	304	1	63	267	751	9.776	2	0.007537	2.53997
IFI27_000630	14	93646335	IFI27	G	C	GENO	22	126	274	22	88	220	752	1.416	2	0.4925	165.972
rs3814821	14	93646690	IFI27	T	C	GENO	89	201	132	89	154	88	753	4.085	2	0.1297	43.7089
rs2799	14	93652679	IFI27	C	G	GENO	2	54	358	3	35	289	741	1.42	2	0.4917	165.703
IFI27_007273	14	93652978	IFI27	0	C	GENO	0	0	421	0	0	331	752	NA	NA	NA	NA
rs1243081	14	93653215	IFI27	A	G	GENO	4	100	291	4	57	256	712	5.538	2	0.06272	21.1366
rs7141881	14	93653617	IFI27	A	G	GENO	53	215	151	38	152	141	750	3.351	2	0.1873	63.1201
rs1243082	14	93653748	IFI27	A	C	GENO	4	51	365	0	37	294	751	3.377	2	0.1848	62.2776
rs10132928	14	93654162	IFI27	G	A	GENO	100	225	95	67	166	98	751	4.993	2	0.08236	27.7553
rs4780355	16	11255359	SOCS1	G	A	GENO	42	166	199	29	128	172	736	1.002	2	0.606	204.222
rs243330	16	11258492	SOCS1	T	C	GENO	97	179	129	68	174	88	735	5.317	2	0.07007	23.6136
rs3760396	17	29605554	CCL2	G	C	GENO	21	121	280	17	116	198	753	3.649	2	0.1613	54.3581
rs2857656	17	29606120	CCL2	G	C	GENO	34	176	208	21	128	181	748	2.203	2	0.3323	111.985
rs4586	17	29607382	CCL2	G	A	GENO	63	211	146	31	166	134	751	6.321	2	0.04241	14.2922
rs4969168	17	73865388	SOCS3	A	G	GENO	14	92	311	18	78	234	747	2.432	2	0.2964	99.8868
rs2292151	19	4767719	TICAM1	T	C	GENO	28	154	237	17	118	194	748	0.9282	2	0.6287	211.872
rs7255265	19	4769378	TICAM1	A	G	GENO	60	186	174	46	152	133	751	0.2003	2	0.9047	304.884
rs12609318	19	6614916	TNFSF14	A	G	GENO	33	165	219	16	141	173	747	3.088	2	0.2136	71.9832
rs1077667	19	6619972	TNFSF14	T	C	GENO	13	139	269	11	118	202	752	0.6515	2	0.722	243.314
rs8106574	19	6622142	TNFSF14	A	G	GENO	22	146	250	16	120	190	744	0.2988	2	0.8612	290.224
rs8112310	19	7710320	CD209	A	T	GENO	14	113	294	4	74	253	752	6.078	2	0.04788	16.1356
rs4804801	19	7713482	CD209	T	A	GENO	14	44	340	1	34	283	716	8.937	2	0.01147	3.86539
rs4804802	19	7713610	CD209	A	G	GENO	1	73	347	3	60	268	752	1.671	2	0.4336	146.123
rs8105572	19	7715327	CD209	A	G	GENO	3	95	319	2	69	259	747	0.4235	2	0.8092	272.7
rs11465384	19	7716006	CD209	T	C	GENO	0	65	354	1	50	280	750	1.286	2	0.5257	177.161
rs2287886	19	7718536	CD209	A	G	GENO	50	176	193	37	165	128	749	4.954	2	0.084	28.308
rs735240	19	7719336	CD209	A	G	GENO	94	203	123	67	183	80	750	3.929	2	0.1402	47.2474
rs7252764	19	7733137	CLEC4M	A	G	GENO	0	42	378	1	24	304	749	2.926	2	0.2316	78.0492
rs2287887	19	7733955	CLEC4M	C	A	GENO	33	164	222	20	153	157	749	4.202	2	0.1223	41.2151
rs868876	19	7737226	CLEC4M	A	T	GENO	36	179	204	25	152	154	750	0.8557	2	0.6519	219.69
rs475896	19	7737429	CLEC4M	C	G	GENO	73	212	136	57	163	111	752	0.1329	2	0.9357	315.331
rs558705	19	7738183	CLEC4M	T	C	GENO	2	75	341	2	87	240	747	7.956	2	0.01873	6.31201
rs557094	19	7738286	CLEC4M	G	C	GENO	6	91	321	4	64	263	749	0.7684	2	0.681	229.497
rs2161525	19	7738664	CLEC4M	G	A	GENO	67	209	142	49	150	130	747	2.45	2	0.2938	99.0106
rs8113469	19	7738959	CLEC4M	G	A	GENO	25	141	250	17	141	171	745	6.274	2	0.04342	14.6325
rs12610506	19	7739071	CLEC4M	A	G	GENO	47	193	180	39	156	136	751	0.2496	2	0.8827	297.47
rs3745376	19	7739690	CLEC4M	A	C	GENO	18	116	286	8	80	242	750	3.374	2	0.1851	62.3787
rs15282	19	7740274	CLEC4M	T	C	GENO	48	180	193	21	138	172	752	6.645	2	0.03607	12.1556
rs2304207	19	54859538	IRF3	C	G	GENO	11	102	306	12	126	193	750	18.08	2	0.0001184	0.0399008
rs2304204	19	54860832	IRF3	C	T	GENO	30	164	226	35	141	155	751	4.871	2	0.08755	29.5044
rs752118	20	44180145	CD40	A	G	GENO	21	150	247	14	121	196	749	0.2729	2	0.8725	294.033
rs745307	20	44180493	CD40	T	C	GENO	30	150	236	15	140	174	745	4.624	2	0.09907	33.3866
rs3765457	20	44190620	CD40	G	A	GENO	17	97	306	8	84	239	751	1.89	2	0.3887	130.992
rs3765459	20	44190814	CD40	A	G	GENO	19	154	243	13	126	192	747	0.2353	2	0.889	299.593
rs11569345	20	44191928	CD40	A	G	GENO	0	28	393	1	17	313	752	2.012	2	0.3658	123.275
rs11569348	20	44192680	CD40	A	C	GENO	13	90	316	7	78	244	748	1.101	2	0.5766	194.314
rs2226299	21	33620794	IFNAR1	A	G	GENO	16	114	285	10	108	212	745	2.605	2	0.2718	91.5966
rs2252930	21	33626071	IFNAR1	C	G	GENO	42	174	205	25	122	184	752	3.866	2	0.1447	48.7639
rs2252931	21	33626190	IFNAR1	A	G	GENO	43	172	206	25	122	184	752	3.792	2	0.1502	50.6174
rs17643419	21	33633668	IFNAR1	A	G	GENO	1	57	363	3	45	283	752	1.57	2	0.4561	153.706
rs2253923	21	33634289	IFNAR1	A	T	GENO	54	196	172	57	154	120	753	3.434	2	0.1796	60.5252
rs2257167	21	33637569	IFNAR1	G	C	GENO	6	95	318	5	83	243	750	0.6097	2	0.7372	248.436
rs12483293	21	33638659	IFNAR1	C	A	GENO	45	147	229	27	141	162	751	5.155	2	0.07597	25.6019
rs2243600	21	33645531	IFNAR1	A	C	GENO	34	145	242	18	133	180	752	3.834	2	0.1471	49.5727
rs2834202	21	33652824	IFNAR1	G	A	GENO	25	149	244	20	137	173	748	2.834	2	0.2424	81.6888
rs9808753	21	33709182	IFNGR2	G	A	GENO	4	109	308	5	80	245	751	0.722	2	0.697	234.889
rs11910627	21	33721220	IFNGR2	G	C	GENO	36	165	219	26	135	170	751	0.2413	2	0.8864	298.717
rs1059293	21	33731563	IFNGR2	A	G	GENO	106	196	120	75	161	95	753	0.66	2	0.7189	242.269
rs2071430	21	41719935	MX1	0	C	GENO	0	0	414	0	0	327	741	NA	NA	NA	NA
rs7280422	21	41723437	MX1	C	G	GENO	9	119	290	27	96	206	747	15.3	2	0.0004761	0.160446
rs455599	21	41726549	MX1	G	A	GENO	98	214	109	77	156	98	752	1.446	2	0.4853	163.546
rs457347	21	41726740	MX1	G	A	GENO	97	213	109	77	155	98	749	1.47	2	0.4795	161.591
rs468672	21	41728034	MX1	A	T	GENO	54	213	143	49	136	142	737	7.989	2	0.01842	6.20754
rs2838036	21	41729610	MX1	A	T	GENO	0	19	402	0	21	309	751	NA	NA	NA	NA
rs8132871	21	41732690	MX1	A	G	GENO	7	105	307	16	89	224	748	7.089	2	0.02889	9.73593
rs467558	21	41733265	MX1	G	A	GENO	40	194	183	35	121	173	746	7.252	2	0.02662	8.97094
rs467960	21	41734761	MX1	G	A	GENO	75	204	143	65	135	131	753	4.35	2	0.1136	38.2832
rs469390	21	41739800	MX1	G	A	GENO	69	204	149	55	138	138	753	3.797	2	0.1498	50.4826
rs7277299	21	41740660	MX1	A	C	GENO	3	59	359	5	42	284	752	1.358	2	0.5072	170.926
rs467639	21	41741434	MX1	A	T	GENO	32	172	215	24	131	175	749	0.221	2	0.8954	301.75
rs2070229	21	41742983	MX1	G	A	GENO	27	174	219	26	126	179	751	1.188	2	0.552	186.024
rs469218	21	41743564	MX1	A	G	GENO	5	16	373	3	13	288	698	0.1385	2	0.9331	314.455
rs3737399	21	41745242	MX1	A	G	GENO	68	207	147	46	155	124	747	1.09	2	0.5799	195.426
rs1050008	21	41746531	MX1	G	A	GENO	7	108	306	15	59	257	752	10.94	2	0.004219	1.4218
rs467593	21	41748421	MX1	G	A	GENO	33	183	202	28	136	166	748	0.5105	2	0.7747	261.074
rs468811	21	41751716	MX1	A	G	GENO	8	122	291	18	71	242	752	11.22	2	0.003667	1.23578
rs13433394	21	41753780	MX1	A	G	GENO	13	117	290	6	81	244	751	2.576	2	0.2758	92.9446
rs4819387	21	44471630	B7H2	A	G	GENO	82	213	127	64	179	88	753	1.264	2	0.5316	179.149
rs4819388	21	44471849	B7H2	A	G	GENO	32	170	216	24	140	167	749	0.2124	2	0.8992	303.03
rs11558819	21	44481202	B7H2	T	C	GENO	24	162	234	26	140	164	750	3.241	2	0.1978	66.6586
rs378299	21	44485771	B7H2	C	T	GENO	74	202	133	56	182	93	740	2.419	2	0.2984	100.561
Legend
SNP	rsID for Single Nucleotide Polymorphism
CHR	Chromosome
Position	Genomic Position
Gene	HUGO gene name
D (minor Allele)	Minor allele according to the frequency reported for this dataset
d (major Allele)	Major allele according to the frequency reported for this dataset
TEST	Association test performed
Symptomatic DD	DD Genotypes in symptomatic cases
Symptomatic Dd	Dd Genotypes in symptomatic cases
Symptomatic dd	dd Genotypes in symptomatic cases
Asymptomatic DD	DD Genotypes in asymptomatic controls
Asymptomatic Dd	DD Genotypes in asymptomatic controls
Asymptomatic dd	DD Genotypes in asymptomatic controls
n	Number of individuals included in the analysis
CHISQ	Chi-squared test statistic
DF	Degrees of Freedom
P-value	Asymptotic p-value for chi-square statistic
Bonferroni P-value	Bonferonni corrected p-value
