# Supplementary material for: Host Genetic Risk Factors for West Nile Virus Infection and Disease Progression
Source: PLoS One. 2011 Sep 15;6(9):e24745. doi: 10.1371/journal.pone.0024745 (PMC3174177; doi:10.1371/journal.pone.0024745)
Supplement: Table S3 — Symptomatic vs. asymptomatic contingency table analysis using a dominant model of inheritance. (XLS) [file pone.0024745.s003.xls]

## Sheet: Sheet1
Table S3. Symptomatic vs. asymptomatic contingency table analysis using a dominant model of inheritance. Genotypic frequency differences between symptomatic and asymptomatic infection were calculated a using 2 x 2 contingency table analysis and are summarized as odds ratios. Two sided p-values were estimated by the chi-sqaure test of significance with 1 degree of freedom. P-values were corrected …
SNP	CHR		Gene	D (minor allele)	d (major allele)	TEST	Symptomatic		Asymptomatic		n	CHISQ	DF	P-value	Bonferroni P-Value	P-value FDR Adjusted	OR Minor Allele	OR Major Allele
		Position					Dd/DD	dd	Dd/DD	dd
rs2254002	1	65074257	JAK1	T	G	DOM	251	170	199	131	751	0.03594	1	0.8496	286.315	0.965192	0.971948	1.02886
rs4916004	1	65076098	JAK1	A	G	DOM	74	346	43	287	750	2.955	1	0.08559	28.8438	0.52038	1.42748	0.700537
rs310244	1	65078465	JAK1	T	C	DOM	153	266	134	197	750	1.232	1	0.2669	89.9453	0.703989	0.845612	1.18258
rs310247	1	65079997	JAK1	T	C	DOM	288	132	233	97	750	0.3607	1	0.5481	184.71	0.883742	0.908311	1.10095
rs2230587	1	65083850	JAK1	T	C	DOM	98	323	68	263	752	0.8053	1	0.3695	124.522	0.811928	1.17347	0.852177
rs10789166	1	65085401	JAK1	G	A	DOM	102	319	86	245	752	0.304	1	0.5814	195.932	0.899017	0.910913	1.0978
rs310219	1	65087886	JAK1	T	C	DOM	183	235	155	176	749	0.693	1	0.4051	136.519	0.830082	0.884228	1.13093
rs188698	1	65091172	JAK1	C	T	DOM	227	194	189	142	752	0.7584	1	0.3838	129.341	0.821726	0.879125	1.13749
rs2256298	1	65103270	JAK1	T	C	DOM	190	227	157	171	745	0.3911	1	0.5317	179.183	0.883742	0.911642	1.09692
rs11585932	1	65107683	JAK1	G	A	DOM	60	355	43	287	745	0.3144	1	0.575	193.775	0.89743	1.12807	0.886469
rs12135754	1	65115093	JAK1	C	A	DOM	70	352	43	287	752	1.835	1	0.1755	59.1435	0.598133	1.3273	0.75341
rs310201	1	65122196	JAK1	C	T	DOM	180	241	131	200	752	0.7718	1	0.3797	127.959	0.821726	1.14029	0.876972
rs310199	1	65122710	JAK1	C	T	DOM	227	194	168	163	752	0.7439	1	0.3884	130.891	0.822968	1.13528	0.880841
rs310198	1	65123656	JAK1	A	G	DOM	91	329	74	256	750	0.06181	1	0.8037	270.847	0.963682	0.956872	1.04507
rs10802189	1	116858253	CD58	A	G	DOM	234	186	174	154	748	0.5278	1	0.4675	157.548	0.839489	1.11346	0.898102
rs17036001	1	116916652	CD58	A	G	DOM	46	369	38	292	745	0.0341	1	0.8535	287.63	0.965441	0.957923	1.04392
rs1335531	1	116916900	CD58	G	C	DOM	182	234	160	170	746	1.662	1	0.1974	66.5238	0.62792	0.826389	1.21008
rs6701046	1	117099257	CD2	G	A	DOM	170	250	130	198	748	0.05436	1	0.8156	274.857	0.963682	1.03569	0.965538
rs3136705	1	117104923	CD2	A	G	DOM	95	326	77	254	752	0.05111	1	0.8211	276.711	0.963682	0.961278	1.04028
rs798043	1	117105020	CD2	T	C	DOM	185	236	138	193	752	0.3832	1	0.5359	180.598	0.883742	1.09632	0.912141
rs1801274	1	159746369	FCGR2A	T	C	DOM	314	107	227	104	752	3.31	1	0.06888	23.2126	0.52038	1.34448	0.743784
rs627839	1	180808704	RNASEL	A	C	DOM	303	116	240	91	750	0.00343	1	0.9533	321.262	0.98449	0.990409	1.00968
rs11072	1	180809954	RNASEL	C	T	DOM	216	203	179	150	748	0.6032	1	0.4374	147.404	0.832924	0.891653	1.12151
rs672527	1	180811844	RNASEL	A	G	DOM	197	224	159	171	751	0.143	1	0.7053	237.686	0.93124	0.945839	1.05726
rs533259	1	180815642	RNASEL	T	C	DOM	51	367	25	306	749	4.377	1	0.03642	12.2735	0.450455	1.70093	0.587915
rs627928	1	180817960	RNASEL	T	G	DOM	284	138	234	97	753	0.9967	1	0.3181	107.2	0.758896	0.853091	1.17221
rs486907	1	180821180	RNASEL	T	C	DOM	242	180	192	139	753	0.0331	1	0.8556	288.337	0.965441	0.973322	1.02741
rs3024498	1	205008152	IL10	C	T	DOM	184	232	144	187	747	0.03947	1	0.8425	283.923	0.963682	1.02993	0.970937
rs3024496	1	205008487	IL10	C	T	DOM	305	113	235	96	749	0.3562	1	0.5506	185.552	0.883742	1.10262	0.906933
rs3024509	1	205009920	IL10	C	T	DOM	44	378	47	281	750	2.637	1	0.1044	35.1828	0.52038	0.695936	1.43691
rs3021094	1	205011575	IL10	G	T	DOM	82	340	54	277	753	1.218	1	0.2698	90.9226	0.703989	1.23715	0.808312
rs1800871	1	205013257	IL10	T	C	DOM	178	240	136	195	749	0.1698	1	0.6803	229.261	0.93124	1.06342	0.940363
rs1800896	1	205013520	IL10	C	T	DOM	302	118	237	94	751	0.008419	1	0.9269	312.365	0.98449	1.01509	0.985135
rs3770768	2	37199655	EIF2AK2	T	C	DOM	86	334	70	261	751	0.05077	1	0.8217	276.913	0.963682	0.960051	1.04161
rs4648212	2	37206515	EIF2AK2	T	C	DOM	47	373	33	296	749	0.2602	1	0.6099	205.536	0.913167	1.13023	0.884776
rs4670185	2	37209038	EIF2AK2	G	A	DOM	48	373	36	295	752	0.05153	1	0.8204	276.475	0.963682	1.05451	0.948305
rs4648186	2	37220611	EIF2AK2	T	C	DOM	104	316	86	244	750	0.1648	1	0.6848	230.778	0.93124	0.933765	1.07093
rs4648184	2	37220999	EIF2AK2	A	T	DOM	31	391	16	315	753	2	1	0.1573	53.0101	0.570964	1.5609	0.640655
rs2373114	2	37226754	EIF2AK2	A	G	DOM	73	346	38	291	748	5.029	1	0.02493	8.40141	0.450455	1.61568	0.618933
rs2254958	2	37229795	EIF2AK2	T	C	DOM	272	145	218	112	747	0.05661	1	0.8119	273.61	0.963682	0.963746	1.03762
rs12712526	2	37236819	EIF2AK2	G	A	DOM	301	111	230	100	742	1.017	1	0.3132	105.548	0.755705	1.17901	0.848173
rs7340267	2	37237964	EIF2AK2	G	A	DOM	301	108	231	100	740	1.311	1	0.2522	84.9914	0.70327	1.20651	0.828837
rs1990760	2	162832297	IFIH1	G	A	DOM	273	147	235	96	751	3.042	1	0.08115	27.3475	0.52038	0.758663	1.31811
rs3747517	2	162837070	IFIH1	T	C	DOM	199	221	177	154	751	2.749	1	0.0973	32.7901	0.52038	0.783445	1.27641
rs13023380	2	162862609	IFIH1	A	G	DOM	311	107	232	98	748	1.557	1	0.2121	71.4777	0.655939	1.22776	0.814489
rs17715343	2	162875992	IFIH1	G	C	DOM	56	365	59	272	752	2.927	1	0.08713	29.3628	0.52038	0.707314	1.4138
rs2059691	2	179010130	PRKRA	A	G	DOM	201	220	183	147	751	4.402	1	0.03589	12.0949	0.450455	0.733905	1.36257
rs2288320	2	179016748	PRKRA	C	A	DOM	139	281	108	221	749	0.006017	1	0.9382	316.173	0.98449	1.01222	0.987923
rs3752689	2	179020859	PRKRA	G	A	DOM	163	253	118	213	747	0.9806	1	0.3221	108.548	0.760025	1.16296	0.859875
rs3771300	2	191543841	STAT1	G	T	DOM	301	119	255	76	751	2.78	1	0.09547	32.1734	0.52038	0.753864	1.3265
rs2066804	2	191550004	STAT1	T	C	DOM	170	250	131	200	751	0.06232	1	0.8029	270.577	0.963682	1.03817	0.963235
rs12693591	2	191568747	STAT1	A	C	DOM	112	310	86	245	753	0.02985	1	0.8628	290.764	0.968824	1.02926	0.971574
rs10173099	2	191575577	STAT1	A	G	DOM	233	189	204	127	753	3.138	1	0.07651	25.7839	0.52038	0.767481	1.30296
rs1879877	2	204278245	CD28	T	G	DOM	182	239	147	182	750	0.1578	1	0.6912	232.934	0.93124	0.942817	1.06065
rs3181096	2	204278337	CD28	A	G	DOM	220	177	183	141	721	0.08221	1	0.7743	260.939	0.963682	0.957673	1.0442
rs3116494	2	204300266	CD28	G	A	DOM	197	224	148	183	752	0.323	1	0.5698	192.023	0.896155	1.08745	0.919586
rs16840252	2	204439764	CTLA4	A	G	DOM	132	289	90	240	751	1.48	1	0.2238	75.4206	0.673416	1.21799	0.821023
rs11571317	2	204440253	CTLA4	A	G	DOM	70	352	56	275	753	0.01456	1	0.9039	304.614	0.98449	0.976562	1.024
rs5742909	2	204440592	CTLA4	A	G	DOM	71	348	58	272	749	0.0515	1	0.8205	276.509	0.963682	0.956797	1.04515
rs41265961	2	204444106	CTLA4	A	G	DOM	31	390	32	299	752	1.282	1	0.2576	86.8112	0.70327	0.742708	1.34642
rs11883722	2	204509090	ICOS	A	G	DOM	151	261	122	207	741	0.01464	1	0.9037	304.547	0.98449	0.981628	1.01872
rs4264550	2	204529739	ICOS	A	G	DOM	108	312	84	247	751	0.01102	1	0.9164	308.827	0.98449	1.01786	0.982456
rs10183087	2	204532569	ICOS	C	A	DOM	192	229	146	185	752	0.1678	1	0.6821	229.868	0.93124	1.06239	0.941273
rs10932035	2	204532897	ICOS	A	G	DOM	86	336	67	264	753	0.002165	1	0.9629	324.497	0.98449	1.00853	0.991543
rs6705653	2	242442232	PDCD1	T	C	DOM	275	139	224	105	743	0.229	1	0.6322	213.051	0.913167	0.927383	1.0783
PDCD1_008885	2	242442870	PCDC1	C	G	DOM	38	377	26	302	743	0.352	1	0.553	186.361	0.883742	1.17078	0.85413
rs7419333	2	242443985	PDCD1	G	C	DOM	231	180	185	146	742	0.007299	1	0.9319	314.05	0.98449	1.01279	0.987369
rs4988457	3	38157140	MYD88	G	C	DOM	47	372	26	304	749	2.339	1	0.1262	42.5294	0.52038	1.47725	0.676932
rs7744	3	38159025	MYD88	G	A	DOM	119	303	101	230	753	0.4805	1	0.4882	164.523	0.852561	0.894357	1.11812
rs6853	3	38159374	MYD88	G	A	DOM	110	312	67	264	753	3.5	1	0.06137	20.6817	0.52038	1.38921	0.719835
rs1799988	3	46387263	CCR5	A	G	DOM	283	133	240	89	745	2.125	1	0.1449	48.8313	0.562751	0.789066	1.26732
rs352140	3	52231737	TLR9	G	A	DOM	300	119	242	89	750	0.2111	1	0.6459	217.668	0.913167	0.927148	1.07858
rs187084	3	52236071	TLR9	C	T	DOM	269	150	207	124	750	0.2205	1	0.6387	215.242	0.913167	1.07427	0.930867
rs17281703	3	120726239	CD80	A	G	DOM	80	339	70	261	750	0.4881	1	0.4848	163.378	0.852227	0.879899	1.13649
rs1599796	3	120726624	CD80	A	G	DOM	150	271	117	212	750	0.0003632	1	0.9848	331.878	0.98876	1.00293	0.997075
rs7628626	3	120727111	CD80	A	C	DOM	151	271	101	230	753	2.312	1	0.1283	43.2371	0.522588	1.26886	0.788108
rs2629396	3	120731657	CD80	G	T	DOM	280	141	213	118	752	0.3821	1	0.5365	180.8	0.883742	1.10012	0.908989
rs2228017	3	120746370	CD80	A	G	DOM	192	229	161	170	752	0.6852	1	0.4078	137.429	0.83052	0.885297	1.12956
rs9282638	3	120746460	CD80	C	T	DOM	118	304	84	246	752	0.5927	1	0.4414	148.752	0.832924	1.13675	0.879702
rs16829980	3	120761158	CD80	G	A	DOM	97	318	67	264	746	1.053	1	0.3048	102.718	0.751378	1.20191	0.832006
rs16829984	3	120761230	CD80	C	G	DOM	90	329	72	259	750	0.008112	1	0.9282	312.803	0.98449	0.984043	1.01622
rs1880661	3	120761538	CD80	T	C	DOM	298	123	218	113	752	2.085	1	0.1487	50.1119	0.564764	1.25584	0.796282
CD80_035889	3	120795177	CD80	A	G	DOM	140	279	116	215	750	0.2192	1	0.6397	215.579	0.913167	0.930046	1.07522
rs2681417	3	123307887	CD86	G	A	DOM	64	358	45	286	753	0.3697	1	0.5432	183.058	0.883742	1.13619	0.880135
rs1129055	3	123321009	CD86	A	G	DOM	187	234	147	183	751	0.001216	1	0.9722	327.631	0.98449	0.994854	1.00517
rs17281995	3	123322331	CD86	G	C	DOM	134	288	86	245	753	2.988	1	0.08388	28.2676	0.52038	1.3255	0.754432
rs2305619	3	158637555	PTX3	A	G	DOM	293	123	234	97	747	0.006098	1	0.9378	316.039	0.98449	0.987457	1.0127
rs3845978	3	158642388	PTX3	A	G	DOM	38	383	29	301	751	0.01292	1	0.9095	306.501	0.98449	1.0298	0.971061
rs3911403	3	158644821	PTX3	T	A	DOM	59	360	35	295	749	2.031	1	0.1541	51.9317	0.570964	1.38135	0.72393
rs3921	4	77161967	CXCL10	C	G	DOM	308	110	256	75	749	1.328	1	0.2491	83.9467	0.70327	0.820312	1.21905
rs4256246	4	77164546	CXCL10	A	G	DOM	128	291	100	231	750	0.009952	1	0.9205	310.209	0.98449	1.01608	0.984172
rs230525	4	103677907	NFKB1	G	A	DOM	222	198	178	153	751	0.06284	1	0.8021	270.308	0.963682	0.963739	1.03763
rs4648050	4	103733779	NFKB1	G	A	DOM	224	194	168	163	749	0.5944	1	0.4407	148.516	0.832924	1.12027	0.892638
rs4648095	4	103746914	NFKB1	G	A	DOM	44	378	30	300	752	0.3724	1	0.5417	182.553	0.883742	1.16402	0.859091
rs1049253	4	185785945	CASP3	C	T	DOM	143	276	111	220	750	0.02914	1	0.8644	291.303	0.968824	1.0269	0.973808
rs2705897	4	185790092	CASP3	A	C	DOM	200	219	170	161	750	0.9731	1	0.3239	109.154	0.760025	0.864894	1.15621
rs2720376	4	185791294	CASP3	G	A	DOM	316	104	244	87	751	0.2261	1	0.6344	213.793	0.913167	1.08339	0.923032
rs2705901	4	185796481	CASP3	G	C	DOM	120	301	110	221	752	1.952	1	0.1624	54.7288	0.570964	0.800966	1.24849
rs4647610	4	185804925	CASP3	T	C	DOM	113	308	90	241	752	0.01148	1	0.9147	308.254	0.98449	0.982431	1.01788
rs2720378	4	185805107	CASP3	C	G	DOM	227	185	173	156	741	0.4652	1	0.4952	166.882	0.852561	1.10645	0.90379
rs4647603	4	185806724	CASP3	T	C	DOM	120	284	103	223	730	0.3044	1	0.5811	195.831	0.899017	0.914809	1.09312
rs3775296	4	187234761	TLR3	T	G	DOM	143	279	122	209	753	0.7183	1	0.3967	133.688	0.822968	0.878048	1.13889
rs1879026	4	187237315	TLR3	T	G	DOM	136	284	104	227	751	0.07862	1	0.7792	262.59	0.963682	1.04523	0.956725
rs3775291	4	187241068	TLR3	T	C	DOM	190	229	166	165	750	1.712	1	0.1907	64.2659	0.62336	0.824696	1.21257
rs3775290	4	187241211	TLR3	T	C	DOM	221	201	175	156	753	0.01863	1	0.8914	300.402	0.98449	0.980128	1.02027
rs2069187	5	54433806	GZMA	C	T	DOM	117	305	79	251	752	1.377	1	0.2406	81.0822	0.698786	1.2188	0.820479
rs1051846	5	54439814	GZMA	C	G	DOM	103	319	66	264	752	2.065	1	0.1507	50.7859	0.565548	1.29154	0.774272
rs839	5	131847025	IRF1	T	C	DOM	238	143	181	140	702	2.677	1	0.1018	34.3066	0.52038	1.28733	0.776801
rs2070729	5	131847820	IRF1	T	G	DOM	292	124	217	112	745	1.522	1	0.2173	73.2301	0.659802	1.2154	0.822774
rs17622656	5	131848896	IRF1	A	G	DOM	235	183	209	119	746	4.29	1	0.03834	12.9206	0.450455	0.731168	1.36767
rs1800630	6	31650455	TNF	A	C	DOM	113	306	102	226	747	1.53	1	0.2161	72.8257	0.659802	0.818211	1.22218
rs3093662	6	31652168	TNF	G	A	DOM	70	347	54	275	746	0.01848	1	0.8919	300.57	0.98449	1.02732	0.973403
rs11914	6	137561281	IFNGR1	G	T	DOM	119	300	113	218	750	2.85	1	0.09139	30.7984	0.52038	0.765251	1.30676
rs3799488	6	137561473	IFNGR1	G	A	DOM	113	308	90	240	751	0.01749	1	0.8948	301.548	0.98449	0.978355	1.02212
rs1327474	6	137582768	IFNGR1	C	T	DOM	292	127	230	98	747	0.01633	1	0.8983	302.727	0.98449	0.979664	1.02076
rs752637	7	128366656	IRF5	T	C	DOM	270	147	209	122	748	0.2067	1	0.6494	218.848	0.913167	1.07216	0.932696
rs3807306	7	128367916	IRF5	T	G	DOM	312	105	224	107	748	4.64	1	0.03123	10.5245	0.450455	1.41939	0.704529
rs1874328	7	128372340	IRF5	C	T	DOM	237	183	186	144	750	0.0003169	1	0.9858	332.215	0.98876	1.00264	0.997363
rs10108662	8	39899146	INDO	A	C	DOM	239	181	192	138	750	0.1233	1	0.7255	244.494	0.940508	0.949068	1.05367
rs3739319	8	39904478	INDO	A	G	DOM	271	150	203	128	752	0.7355	1	0.3911	131.801	0.822968	1.13918	0.877825
rs268561	8	71656476	TRAM1	G	A	DOM	213	209	182	147	751	1.741	1	0.187	63.019	0.62336	0.823151	1.21484
rs7011101	8	71664028	TRAM1	C	A	DOM	102	318	72	259	751	0.6674	1	0.4139	139.484	0.832924	1.15383	0.866682
rs3816745	8	71669188	TRAM1	C	G	DOM	268	154	210	120	752	0.001336	1	0.9708	327.16	0.98449	0.994434	1.0056
rs17686100	8	71669566	TRAM1	G	A	DOM	71	351	36	295	753	5.384	1	0.02032	6.84784	0.450455	1.65757	0.603294
rs268594	8	71675684	TRAM1	A	G	DOM	217	203	150	178	748	2.596	1	0.1071	36.0927	0.52038	1.26851	0.788329
rs268598	8	71677425	TRAM1	G	A	DOM	66	354	64	267	751	1.696	1	0.1928	64.9736	0.62336	0.777807	1.28567
rs268600	8	71680925	TRAM1	G	A	DOM	42	352	38	286	718	0.205	1	0.6507	219.286	0.913167	0.898026	1.11355
rs10429491	9	5040706	JAK2	A	G	DOM	207	214	153	177	751	0.5832	1	0.4451	149.999	0.835188	1.11902	0.893638
rs2230724	9	5071780	JAK2	G	A	DOM	316	104	251	79	750	0.06778	1	0.7946	267.78	0.963682	0.956329	1.04567
rs12340866	9	5084185	JAK2	A	G	DOM	193	228	145	183	749	0.1993	1	0.6553	220.836	0.915775	1.06833	0.93604
rs3780378	9	5102288	JAK2	G	A	DOM	319	99	247	83	748	0.2156	1	0.6424	216.489	0.913167	1.08277	0.923556
rs3780379	9	5102519	JAK2	A	G	DOM	155	261	129	202	747	0.2296	1	0.6318	212.917	0.913167	0.929936	1.07534
rs10815160	9	5106616	JAK2	C	A	DOM	193	226	164	167	750	0.9003	1	0.3427	115.49	0.789392	0.869604	1.14995
rs822336	9	5438690	PDCD1L1	G	C	DOM	307	112	246	85	750	0.1054	1	0.7455	251.234	0.946757	0.947118	1.05583
rs12002985	9	5446587	PDCD1L1	G	C	DOM	296	125	226	105	752	0.36	1	0.5485	184.844	0.883742	1.10018	0.908945
rs17804441	9	5447733	PDCD1L1	G	A	DOM	159	261	151	180	751	4.601	1	0.03195	10.7671	0.450455	0.726193	1.37704
rs2297137	9	5455732	PDCD1L1	T	C	DOM	163	253	128	193	737	0.03639	1	0.8487	286.012	0.965192	0.971437	1.0294
PDCD1L1_017464	9	5456085	PDCD1L	G	A	DOM	151	269	150	180	750	6.945	1	0.008407	2.83316	0.350992	0.673606	1.48455
PDCD1L1_019180	9	5457801	PDCD1L1	A	G	DOM	42	380	37	294	753	0.2967	1	0.5859	197.448	0.9018	0.878236	1.13865
rs2297136	9	5457955	PDCD1L1	C	T	DOM	316	104	226	105	751	4.465	1	0.0346	11.6602	0.450455	1.41167	0.708379
rs4143815	9	5458257	PDCD1L1	C	G	DOM	200	219	175	154	748	2.197	1	0.1383	46.6071	0.549907	0.803653	1.24432
rs16923189	9	5500644	PDCD1LG2	G	A	DOM	209	213	196	133	751	7.513	1	0.006126	2.06446	0.341014	0.665828	1.50189
rs7854413	9	5547708	PDCD1LG2	G	A	DOM	84	337	66	265	752	1.936e-05	1	0.9965	335.821	0.9965	1.00081	0.999191
rs7852996	9	5559860	PDCD1LG2	T	A	DOM	79	342	65	264	750	0.1171	1	0.7322	246.751	0.940595	0.938192	1.06588
rs1051922	9	21067716	IFNB1	T	C	DOM	249	172	187	143	751	0.4666	1	0.4946	166.68	0.852561	1.10705	0.903306
rs28383793	9	21430416	IFNA	G	A	DOM	40	382	21	310	753	2.448	1	0.1177	39.6649	0.52038	1.54575	0.646935
rs12685904	9	21431310	IFNA	C	A	DOM	18	401	18	313	750	0.5279	1	0.4675	157.548	0.839489	0.780549	1.28115
rs10985085	9	122705118	TRAF1	A	G	DOM	55	366	37	294	752	0.6138	1	0.4334	146.056	0.832924	1.19406	0.837477
rs4836834	9	122705722	TRAF1	T	A	DOM	290	132	228	103	753	0.002262	1	0.9621	324.228	0.98449	0.992491	1.00757
rs2239657	9	122711341	TRAF1	G	A	DOM	239	176	194	135	744	0.1429	1	0.7054	237.72	0.93124	0.944968	1.05824
rs13440146	9	122721272	TRAF1	A	C	DOM	58	355	45	284	742	0.02049	1	0.8862	298.649	0.98449	1.03111	0.969828
rs10824792	10	54196212	MBL2	G	A	DOM	275	146	203	126	750	1.046	1	0.3064	103.257	0.751378	1.16911	0.855354
rs11595876	10	54196768	MBL2	G	A	DOM	57	365	41	290	753	0.2057	1	0.6502	219.117	0.913167	1.10458	0.905324
rs930507	10	54198272	MBL2	G	C	DOM	133	287	95	235	750	0.7238	1	0.3949	133.081	0.822968	1.14634	0.87234
rs1838066	10	54199331	MBL2	G	A	DOM	250	172	214	116	752	2.464	1	0.1165	39.2605	0.52038	0.787872	1.26924
rs10824793	10	54199486	MBL2	G	A	DOM	294	128	227	103	752	0.06744	1	0.7951	267.949	0.963682	1.04219	0.959514
rs4647964	10	54201105	MBL2	G	G	DOM	0	400	0	318	718	NA	NA	NA	NA	NA	NA	NA
rs1800450	10	54201241	MBL2	T	C	DOM	100	322	74	257	753	0.1875	1	0.665	224.105	0.925458	1.07856	0.92716
rs1889490	10	72027719	PRF1	T	C	DOM	265	155	232	97	749	4.551	1	0.03289	11.0839	0.450455	0.714822	1.39895
rs35069510	10	72032901	PRF1	T	C	DOM	70	350	51	276	747	0.1552	1	0.6936	233.743	0.93124	1.08235	0.923913
rs1800682	10	90739943	FAS	C	T	DOM	288	130	217	113	748	0.83	1	0.3623	122.095	0.806721	1.15363	0.866826
rs2234978	10	90761809	FAS	A	G	DOM	200	219	149	181	749	0.4943	1	0.482	162.434	0.851788	1.10937	0.901409
rs1051070	10	90764752	FAS	T	A	DOM	80	336	61	269	746	0.0668	1	0.7961	268.286	0.963682	1.04996	0.952416
rs17468739	10	91055929	IFIT2	C	A	DOM	128	291	128	202	749	5.57	1	0.01827	6.15699	0.450455	0.694158	1.44059
rs2070845	10	91056055	IFIT2	G	A	DOM	190	230	157	174	751	0.3585	1	0.5494	185.148	0.883742	0.915536	1.09226
rs954439	10	91056440	IFIT2	T	A	DOM	268	124	242	78	712	4.567	1	0.0326	10.9862	0.450455	0.696614	1.43551
rs1727	10	91056749	IFIT2	C	A	DOM	169	250	152	179	750	2.358	1	0.1246	41.9902	0.52038	0.796079	1.25616
rs303215	10	91146811	IFIT1	G	A	DOM	153	269	106	224	752	1.402	1	0.2364	79.6668	0.692611	1.20194	0.831991
rs11203109	10	91147139	IFIT1	G	A	DOM	205	215	161	170	751	0.002117	1	0.9633	324.632	0.98449	1.00679	0.993257
rs304485	10	91149890	IFIT1	A	T	DOM	290	130	240	90	750	1.207	1	0.2719	91.6303	0.703989	0.836538	1.1954
rs303212	10	91151335	IFIT1	G	A	DOM	193	228	132	199	752	2.686	1	0.1012	34.1044	0.52038	1.27615	0.783607
rs303211	10	91152477	IFIT1	A	G	DOM	39	382	28	303	752	0.1478	1	0.7007	236.136	0.93124	1.10481	0.905137
rs3809112	11	297036	IFITM2	G	A	DOM	253	168	178	150	749	2.562	1	0.1095	36.9015	0.52038	1.26906	0.787984
rs11246062	11	303755	IFITM1	G	C	DOM	222	196	159	172	749	1.903	1	0.1678	56.5486	0.577786	1.22526	0.816153
rs3758650	11	606865	IRF7	A	G	DOM	33	376	38	292	739	2.498	1	0.114	38.418	0.52038	0.674412	1.48277
rs731909	11	2365200	CD81	C	G	DOM	113	307	91	239	750	0.04202	1	0.8376	282.271	0.963682	0.966711	1.03444
rs800335	11	2367517	CD81	G	A	DOM	154	261	111	219	745	0.967	1	0.3254	109.66	0.760025	1.16413	0.859011
rs3740961	11	36466647	TRAF6	C	T	DOM	99	321	77	254	751	0.009824	1	0.921	310.377	0.98449	1.01736	0.98294
rs331457	11	36480188	TRAF6	T	C	DOM	105	314	88	242	749	0.2492	1	0.6176	208.131	0.913167	0.919586	1.08745
rs5030419	11	36487319	TRAF6	G	C	DOM	106	312	65	265	748	3.352	1	0.06711	22.6161	0.52038	1.38511	0.721965
rs7127254	11	46265125	CREB3L1	A	G	DOM	166	255	144	187	752	1.27	1	0.2598	87.5526	0.70327	0.84537	1.18291
rs11038852	11	46270467	CREB3L1	G	C	DOM	197	223	168	162	750	1.186	1	0.2761	93.0457	0.709365	0.851858	1.1739
rs4625425	11	46289469	CREB3L1	C	A	DOM	125	294	117	214	750	2.573	1	0.1087	36.6319	0.52038	0.777661	1.28591
rs2288249	11	46290815	CREB3L1	A	G	DOM	63	356	36	295	750	2.793	1	0.0947	31.9139	0.52038	1.45014	0.689588
rs4963271	11	63061760	RARRES3	G	A	DOM	160	260	102	228	750	4.199	1	0.04046	13.635	0.450455	1.37557	0.726974
rs1131715	11	69731135	FADD	G	A	DOM	278	141	230	101	750	0.8331	1	0.3614	121.792	0.806721	0.865803	1.155
rs7115875	11	75737878	PRKRIR	G	A	DOM	96	321	68	260	745	0.5608	1	0.454	152.998	0.835918	1.14349	0.874519
rs3824908	11	75754968	PRKRIR	C	A	DOM	173	248	140	190	751	0.1349	1	0.7134	240.416	0.938093	0.946717	1.05628
rs7925910	11	75765047	PRKRIR	G	A	DOM	122	298	93	236	749	0.05486	1	0.8148	274.588	0.963682	1.0389	0.962559
rs4320976	11	75765492	PRKRIR	A	G	DOM	133	289	116	214	752	1.105	1	0.2932	98.8084	0.735299	0.849004	1.17785
rs4252249	11	117364419	IL10RA	A	G	DOM	86	331	66	264	747	0.04419	1	0.8335	280.889	0.963682	1.03927	0.962209
rs2508450	11	117369039	IL10RA	A	G	DOM	288	134	236	95	753	0.8168	1	0.3661	123.376	0.809784	0.865166	1.15585
rs3135932	11	117369273	IL10RA	G	A	DOM	130	291	94	237	752	0.545	1	0.4604	155.155	0.839489	1.12634	0.887829
rs4252314	11	117373727	IL10RA	G	A	DOM	29	392	18	313	752	0.6652	1	0.4147	139.754	0.832924	1.28642	0.777349
rs2229113	11	117374880	IL10RA	A	G	DOM	223	197	186	143	749	0.8806	1	0.348	117.276	0.794102	0.870285	1.14905
rs9610	11	117377296	IL10RA	A	G	DOM	300	122	228	103	753	0.4316	1	0.5112	172.274	0.866705	1.11087	0.900194
rs8177352	11	125659053	TIRAP	G	A	DOM	154	254	112	219	739	1.212	1	0.271	91.327	0.703989	1.18553	0.843504
rs3802813	11	125667678	TIRAP	A	G	DOM	38	383	25	305	751	0.5064	1	0.4767	160.648	0.851432	1.21044	0.826143
rs3802814	11	125667817	TIRAP	A	G	DOM	122	298	88	243	751	0.5568	1	0.4555	153.504	0.835918	1.13049	0.884571
rs8177375	11	125668274	TIRAP	G	A	DOM	92	329	80	251	752	0.5637	1	0.4528	152.594	0.835918	0.877356	1.13979
rs8177376	11	125668822	TIRAP	C	A	DOM	164	256	136	195	751	0.3211	1	0.5709	192.393	0.896155	0.918543	1.08868
rs625413	11	125669559	TIRAP	A	G	DOM	167	254	122	209	752	0.6181	1	0.4317	145.483	0.832924	1.12634	0.887832
rs1786704	11	125670967	TIRAP	G	A	DOM	155	266	122	208	751	0.00185	1	0.9657	325.441	0.98449	0.993467	1.00658
rs17199006	12	7775618	CLEC4C	G	A	DOM	115	306	108	223	752	2.507	1	0.1133	38.1821	0.52038	0.775992	1.28867
rs1894823	12	7781816	CLEC4C	A	G	DOM	174	246	163	167	750	4.739	1	0.02949	9.93813	0.450455	0.724675	1.37993
rs10845821	12	7791451	CLEC4C	A	G	DOM	263	157	208	123	751	0.003861	1	0.9505	320.319	0.98449	0.990599	1.00949
rs4251460	12	42449035	IRAK4	C	A	DOM	97	322	56	275	750	4.423	1	0.03546	11.95	0.450455	1.47931	0.675989
rs4251513	12	42460471	IRAK4	G	C	DOM	320	100	242	89	751	0.9316	1	0.3344	112.693	0.775622	1.17686	0.849719
rs4251580	12	42461033	IRAK4	A	G	DOM	99	321	86	244	750	0.6162	1	0.4325	145.752	0.832924	0.875027	1.14282
rs4251520	12	42461605	IRAK4	G	A	DOM	85	334	64	266	749	0.09227	1	0.7613	256.558	0.955918	1.05773	0.945422
rs4251545	12	42466562	IRAK4	A	G	DOM	82	336	51	280	749	2.241	1	0.1344	45.2928	0.540839	1.33987	0.746341
rs1544410	12	46526102	VDR	T	C	DOM	254	166	208	123	751	0.4369	1	0.5086	171.398	0.866705	0.904831	1.10518
rs2066807	12	55026949	STAT2	G	C	DOM	74	347	54	277	752	0.2093	1	0.6473	218.14	0.913167	1.09393	0.914138
rs7316037	12	63133078	TBK1	A	G	DOM	78	334	46	281	739	3.09	1	0.07879	26.5522	0.52038	1.42658	0.700976
rs11175398	12	63137245	TBK1	G	A	DOM	277	140	251	79	747	8.251	1	0.004074	1.37294	0.324047	0.622738	1.60581
rs10878175	12	63153605	TBK1	C	G	DOM	176	241	147	184	748	0.3656	1	0.5454	183.8	0.883742	0.914105	1.09397
rs7303577	12	63160369	TBK1	C	A	DOM	81	341	95	236	753	9.36	1	0.002217	0.747129	0.27221	0.590091	1.69465
rs2069727	12	66834490	IFNG	C	T	DOM	279	138	233	98	748	1.039	1	0.3082	103.863	0.751378	0.850345	1.17599
rs2069718	12	66836429	IFNG	T	C	DOM	283	138	216	115	752	0.3202	1	0.5715	192.596	0.896155	1.09182	0.915901
rs2069716	12	66837082	IFNG	C	T	DOM	46	374	43	287	750	0.7629	1	0.3824	128.869	0.821726	0.820918	1.21815
rs1861494	12	66837676	IFNG	G	A	DOM	205	214	159	171	749	0.04093	1	0.8397	282.979	0.963682	1.03024	0.970646
rs10744785	12	111829639	OAS1	G	C	DOM	162	257	132	197	748	0.1642	1	0.6853	230.946	0.93124	0.94075	1.06298
rs34137742	12	111833044	OAS1	A	G	DOM	101	299	99	225	724	2.52	1	0.1124	37.8788	0.52038	0.767711	1.30257
rs3741981	12	111833253	OAS1	G	A	DOM	293	127	216	115	751	1.72	1	0.1897	63.9289	0.62336	1.22831	0.814127
OAS1_004547	12	111833482	OAS1	A	G	DOM	57	361	47	279	744	0.09286	1	0.7606	256.322	0.955918	0.93729	1.06691
rs10774671	12	111841576	OAS1	G	A	DOM	257	163	187	144	751	1.688	1	0.1938	65.3106	0.62336	1.21413	0.823633
rs1859330	12	111860771	OAS3	C	T	DOM	250	155	180	145	730	2.998	1	0.08339	28.1024	0.52038	1.29928	0.769655
rs7961861	12	111870301	OAS3	G	A	DOM	290	123	226	102	741	0.1496	1	0.6989	235.529	0.93124	1.06411	0.939757
rs2285933	12	111871162	OAS3	G	C	DOM	200	221	153	178	752	0.1224	1	0.7265	244.831	0.940508	1.05285	0.949803
rs2285932	12	111871333	OAS3	T	C	DOM	231	189	167	163	750	1.433	1	0.2314	77.9818	0.685143	1.19295	0.83826
rs2072136	12	111883302	OAS3	T	C	DOM	170	252	137	194	753	0.09386	1	0.7593	255.884	0.955918	0.955277	1.04682
OAS3_026920	12	111885590	OAS3	A	G	DOM	95	323	99	227	744	5.547	1	0.01851	6.23787	0.450455	0.674391	1.48282
OAS3_029396	12	111888066	OAS3	A	G	DOM	200	206	159	170	735	0.06329	1	0.8014	270.072	0.963682	1.03804	0.963353
rs2240188	12	111888067	OAS3	T	C	DOM	203	206	155	170	734	0.2731	1	0.6013	202.638	0.912883	1.0808	0.925239
rs2010549	12	111893380	OAS3	G	C	DOM	149	269	116	214	748	0.01971	1	0.8884	299.391	0.98449	1.02186	0.978611
rs2072133	12	111893643	OAS3	C	T	DOM	119	302	119	211	751	5.192	1	0.02269	7.64653	0.450455	0.698675	1.43128
rs7138261	12	111894353	OAS3	A	G	DOM	51	337	44	277	709	0.04796	1	0.8267	278.598	0.963682	0.952725	1.04962
rs2072138	12	111909276	OAS2	C	G	DOM	202	218	163	167	750	0.1248	1	0.7239	243.954	0.940508	0.949344	1.05336
rs35992364	12	111917267	OAS2	G	A	DOM	99	323	85	246	753	0.4951	1	0.4816	162.299	0.851788	0.887052	1.12733
rs1293755	12	111919833	OAS2	T	A	DOM	216	203	157	174	750	1.255	1	0.2626	88.4962	0.70327	1.17925	0.847994
rs2072137	12	111925304	OAS2	C	T	DOM	272	149	219	111	751	0.2519	1	0.6157	207.491	0.913167	0.925255	1.08078
rs929291	12	111928801	OAS2	T	C	DOM	229	191	157	169	746	2.977	1	0.08444	28.4563	0.52038	1.29059	0.774838
rs916973	12	111931486	OAS2	C	T	DOM	59	363	45	281	748	0.004833	1	0.9446	318.33	0.98449	1.01494	0.985283
rs15895	12	111932671	OAS2	T	C	DOM	242	180	177	154	753	1.127	1	0.2885	97.2245	0.733788	1.16974	0.854889
rs13311	12	111933035	OAS2	A	C	DOM	254	167	208	122	751	0.5687	1	0.4508	151.92	0.835918	0.8921	1.12095
rs1296371	12	111934088	OAS2	C	T	DOM	166	242	141	181	730	0.7109	1	0.3992	134.53	0.823042	0.880546	1.13566
rs12819210	12	119942783	OASL	A	G	DOM	159	263	101	230	753	4.212	1	0.04015	13.5305	0.450455	1.37673	0.72636
rs3213546	12	119955599	OASL	C	G	DOM	23	398	16	315	752	0.1493	1	0.6992	235.63	0.93124	1.13772	0.878951
rs3213545	12	119955720	OASL	T	C	DOM	183	236	164	166	749	2.692	1	0.1009	34.0033	0.52038	0.78488	1.27408
rs10774580	12	119960806	OASL	A	G	DOM	274	147	234	96	751	2.869	1	0.09031	30.4345	0.52038	0.764696	1.30771
rs28360475	12	119961429	OASL	G	A	DOM	175	245	102	228	750	9.181	1	0.002445	0.823965	0.27221	1.59664	0.626316
rs2236350	14	23700850	ISGF3G	T	G	DOM	87	331	66	264	748	0.07499	1	0.7842	264.275	0.963682	1.05136	0.951149
rs12436555	14	23704665	ISGF3G	A	G	DOM	132	286	93	237	748	1.012	1	0.3145	105.987	0.755705	1.17618	0.850211
rs2236338	14	24170122	GZMB	G	A	DOM	166	254	110	220	750	3.045	1	0.08099	27.2936	0.52038	1.30709	0.76506
rs11539752	14	24171429	GZMB	C	G	DOM	162	257	119	211	749	0.5335	1	0.4651	156.739	0.839489	1.11768	0.894711
rs2273844	14	24173254	GZMB	A	G	DOM	163	258	119	212	752	0.6048	1	0.4368	147.202	0.832924	1.12553	0.888471
rs28489163	14	93645984	IFI27	A	G	DOM	116	304	64	267	751	6.97	1	0.008287	2.79272	0.350992	1.5919	0.62818
IFI27_000630	14	93646335	IFI27	G	C	DOM	148	274	110	220	752	0.2481	1	0.6184	208.401	0.913167	1.08029	0.925676
rs3814821	14	93646690	IFI27	T	C	DOM	290	132	243	88	753	1.976	1	0.1598	53.8526	0.570964	0.79561	1.2569
rs2799	14	93652679	IFI27	C	G	DOM	56	358	38	289	741	0.5991	1	0.4389	147.909	0.832924	1.18965	0.840583
IFI27_007273	14	93652978	IFI27	0	C	DOM	0	421	0	331	752	NA	NA	NA	NA	NA	NA	NA
rs1243081	14	93653215	IFI27	A	G	DOM	104	291	61	256	712	4.96	1	0.02594	8.74178	0.450455	1.49986	0.666729
rs7141881	14	93653617	IFI27	A	G	DOM	268	151	190	141	750	3.347	1	0.06733	22.6902	0.52038	1.31711	0.759236
rs1243082	14	93653748	IFI27	A	C	DOM	55	365	37	294	751	0.6328	1	0.4263	143.663	0.832924	1.19733	0.835189
rs10132928	14	93654162	IFI27	G	A	DOM	325	95	233	98	751	4.734	1	0.02957	9.96509	0.450455	1.4389	0.694976
rs4780355	16	11255359	SOCS1	G	A	DOM	208	199	157	172	736	0.8341	1	0.3611	121.691	0.806721	1.14509	0.873295
rs243330	16	11258492	SOCS1	T	C	DOM	276	129	242	88	735	2.35	1	0.1253	42.2261	0.52038	0.778013	1.28533
rs3760396	17	29605554	CCL2	G	C	DOM	142	280	133	198	753	3.414	1	0.06465	21.7871	0.52038	0.754995	1.32451
rs2857656	17	29606120	CCL2	G	C	DOM	210	208	149	181	748	1.912	1	0.1667	56.1779	0.577786	1.22645	0.815364
rs4586	17	29607382	CCL2	G	A	DOM	274	146	197	134	751	2.592	1	0.1074	36.1938	0.52038	1.27655	0.783364
rs4969168	17	73865388	SOCS3	A	G	DOM	106	311	96	234	747	1.258	1	0.2619	88.2603	0.70327	0.830788	1.20368
rs2292151	19	4767719	TICAM1	T	C	DOM	182	237	135	194	748	0.4359	1	0.5091	171.567	0.866705	1.10355	0.906169
rs7255265	19	4769378	TICAM1	A	G	DOM	246	174	198	133	751	0.1192	1	0.7299	245.976	0.940595	0.949669	1.053
rs12609318	19	6614916	TNFSF14	A	G	DOM	198	219	157	173	747	0.0006491	1	0.9797	330.159	0.988579	0.996248	1.00377
rs1077667	19	6619972	TNFSF14	T	C	DOM	152	269	129	202	752	0.6514	1	0.4196	141.405	0.832924	0.884816	1.13018
rs8106574	19	6622142	TNFSF14	A	G	DOM	168	250	136	190	744	0.1766	1	0.6743	227.239	0.93124	0.938824	1.06516
rs8112310	19	7710320	CD209	A	T	DOM	127	294	78	253	752	4.072	1	0.04359	14.6898	0.469647	1.40114	0.713703
rs4804801	19	7713482	CD209	T	A	DOM	58	340	35	283	716	1.99	1	0.1584	53.3808	0.570964	1.37933	0.724991
rs4804802	19	7713610	CD209	A	G	DOM	74	347	63	268	752	0.2637	1	0.6076	204.761	0.913167	0.907186	1.10231
rs8105572	19	7715327	CD209	A	G	DOM	98	319	71	259	747	0.4151	1	0.5194	175.038	0.87616	1.12067	0.892325
rs11465384	19	7716006	CD209	T	C	DOM	65	354	51	280	750	0.001567	1	0.9684	326.351	0.98449	1.00809	0.991978
rs2287886	19	7718536	CD209	A	G	DOM	226	193	202	128	749	3.989	1	0.04581	15.438	0.478142	0.74201	1.34769
rs735240	19	7719336	CD209	A	G	DOM	297	123	250	80	750	2.381	1	0.1228	41.3836	0.52038	0.772683	1.29419
rs7252764	19	7733137	CLEC4M	A	G	DOM	42	378	25	304	749	1.306	1	0.2531	85.2947	0.70327	1.35111	0.740132
rs2287887	19	7733955	CLEC4M	C	A	DOM	197	222	173	157	749	2.16	1	0.1417	47.7529	0.556798	0.805317	1.24175
rs868876	19	7737226	CLEC4M	A	T	DOM	215	204	177	154	750	0.3463	1	0.5562	187.439	0.884623	0.916971	1.09055
rs475896	19	7737429	CLEC4M	C	G	DOM	285	136	220	111	752	0.1272	1	0.7213	243.078	0.940508	1.05732	0.945788
rs558705	19	7738183	CLEC4M	T	C	DOM	77	341	89	240	747	7.934	1	0.004851	1.63479	0.324047	0.608916	1.64226
rs557094	19	7738286	CLEC4M	G	C	DOM	97	321	68	263	749	0.7621	1	0.3827	128.97	0.821726	1.16873	0.855631
rs2161525	19	7738664	CLEC4M	G	A	DOM	276	142	199	130	747	2.442	1	0.1181	39.7997	0.52038	1.26973	0.78757
rs8113469	19	7738959	CLEC4M	G	A	DOM	166	250	158	171	745	4.929	1	0.02641	8.90017	0.450455	0.718633	1.39153
rs12610506	19	7739071	CLEC4M	A	G	DOM	240	180	195	136	751	0.2378	1	0.6258	210.895	0.913167	0.929915	1.07537
rs3745376	19	7739690	CLEC4M	A	C	DOM	134	286	88	242	750	2.433	1	0.1188	40.0356	0.52038	1.28846	0.776119
rs15282	19	7740274	CLEC4M	T	C	DOM	228	193	159	172	752	2.779	1	0.0955	32.1835	0.52038	1.27794	0.782512
rs2304207	19	54859538	IRF3	C	G	DOM	113	306	138	193	750	18	1	2.207e-05	0.00743759	0.0073814	0.516458	1.93626	0.516458
rs2304204	19	54860832	IRF3	C	T	DOM	194	226	176	155	751	3.61	1	0.05743	19.3539	0.52038	0.755984	1.32278
rs752118	20	44180145	CD40	A	G	DOM	171	247	135	196	749	0.001168	1	0.9727	327.8	0.98449	1.00513	0.994898
rs745307	20	44180493	CD40	T	C	DOM	180	236	155	174	745	1.097	1	0.295	99.415	0.735299	0.856206	1.16794
rs3765457	20	44190620	CD40	G	A	DOM	114	306	92	239	751	0.0395	1	0.8425	283.923	0.963682	0.967818	1.03325
rs3765459	20	44190814	CD40	A	G	DOM	173	243	139	192	747	0.01258	1	0.9107	306.906	0.98449	0.983391	1.01689
rs11569345	20	44191928	CD40	A	G	DOM	28	393	18	313	752	0.4746	1	0.4909	165.433	0.852561	1.2389	0.807166
rs11569348	20	44192680	CD40	A	C	DOM	103	316	85	244	748	0.1539	1	0.6948	234.148	0.93124	0.935666	1.06876
rs2226299	21	33620794	IFNAR1	A	G	DOM	130	285	118	212	745	1.626	1	0.2022	68.1414	0.637121	0.819506	1.22025
rs2252930	21	33626071	IFNAR1	C	G	DOM	216	205	147	184	752	3.529	1	0.06032	20.3278	0.52038	1.31887	0.758228
rs2252931	21	33626190	IFNAR1	A	G	DOM	215	206	147	184	752	3.29	1	0.06969	23.4855	0.52038	1.30639	0.76547
rs17643419	21	33633668	IFNAR1	A	G	DOM	58	363	48	283	752	0.08039	1	0.7768	261.782	0.963682	0.942034	1.06153
rs2253923	21	33634289	IFNAR1	A	T	DOM	250	172	211	120	753	1.585	1	0.208	70.096	0.649271	0.826628	1.20973
rs2257167	21	33637569	IFNAR1	G	C	DOM	101	318	88	243	750	0.6039	1	0.4371	147.303	0.832924	0.877037	1.1402
rs12483293	21	33638659	IFNAR1	C	A	DOM	192	229	168	162	751	2.085	1	0.1488	50.1456	0.564764	0.808484	1.23688
rs2243600	21	33645531	IFNAR1	A	C	DOM	179	242	151	180	752	0.7239	1	0.3949	133.081	0.822968	0.881725	1.13414
rs2834202	21	33652824	IFNAR1	G	A	DOM	174	244	157	173	748	2.646	1	0.1038	34.9806	0.52038	0.785789	1.27261
rs9808753	21	33709182	IFNGR2	G	A	DOM	113	308	85	245	751	0.1118	1	0.7381	248.74	0.943104	1.05749	0.945638
rs11910627	21	33721220	IFNGR2	G	C	DOM	201	219	161	170	751	0.04549	1	0.8311	280.081	0.963682	0.969114	1.03187
rs1059293	21	33731563	IFNGR2	A	G	DOM	302	120	236	95	753	0.00638	1	0.9363	315.533	0.98449	1.01306	0.987104
rs2071430	21	41719935	MX1	0	C	DOM	0	414	0	327	741	NA	NA	NA	NA	NA	NA	NA
rs7280422	21	41723437	MX1	C	G	DOM	128	290	123	206	747	3.775	1	0.05202	17.5307	0.52038	0.739221	1.35278
rs455599	21	41726549	MX1	G	A	DOM	312	109	233	98	752	1.283	1	0.2573	86.7101	0.70327	1.20392	0.830619
rs457347	21	41726740	MX1	G	A	DOM	310	109	232	98	749	1.252	1	0.2632	88.6984	0.70327	1.20136	0.83239
rs468672	21	41728034	MX1	A	T	DOM	267	143	185	142	737	5.603	1	0.01793	6.04241	0.450455	1.43315	0.697763
rs2838036	21	41729610	MX1	A	T	DOM	19	402	21	309	751	1.256	1	0.2623	88.3951	0.70327	0.695451	1.43792
rs8132871	21	41732690	MX1	A	G	DOM	112	307	105	224	748	2.405	1	0.1209	40.7433	0.52038	0.778284	1.28488
rs467558	21	41733265	MX1	G	A	DOM	234	183	156	173	746	5.578	1	0.01819	6.13003	0.450455	1.41803	0.705202
rs467960	21	41734761	MX1	G	A	DOM	279	143	200	131	753	2.595	1	0.1072	36.1264	0.52038	1.27794	0.782511
rs469390	21	41739800	MX1	G	A	DOM	273	149	193	138	753	3.205	1	0.07341	24.7392	0.52038	1.31008	0.763312
rs7277299	21	41740660	MX1	A	C	DOM	62	359	47	284	752	0.0416	1	0.8384	282.541	0.963682	1.04356	0.958258
rs467639	21	41741434	MX1	A	T	DOM	204	215	155	175	749	0.2182	1	0.6404	215.815	0.913167	1.07127	0.933473
rs2070229	21	41742983	MX1	G	A	DOM	201	219	152	179	751	0.2784	1	0.5977	201.425	0.911561	1.08084	0.925206
rs469218	21	41743564	MX1	A	G	DOM	21	373	16	288	698	0.001525	1	0.9688	326.486	0.98449	1.0134	0.986772
rs3737399	21	41745242	MX1	A	G	DOM	275	147	201	124	747	0.8753	1	0.3495	117.781	0.794102	1.15409	0.866481
rs1050008	21	41746531	MX1	G	A	DOM	115	306	74	257	752	2.422	1	0.1196	40.3052	0.52038	1.3052	0.766165
rs467593	21	41748421	MX1	G	A	DOM	216	202	164	166	748	0.2886	1	0.5911	199.201	0.90563	1.08235	0.923918
rs468811	21	41751716	MX1	A	G	DOM	130	291	89	242	752	1.43	1	0.2318	78.1166	0.685143	1.21472	0.823236
rs13433394	21	41753780	MX1	A	G	DOM	130	290	87	244	751	1.964	1	0.1611	54.2907	0.570964	1.25723	0.795397
rs4819387	21	44471630	B7H2	A	G	DOM	295	127	243	88	753	1.119	1	0.29	97.73	0.733788	0.841191	1.18879
rs4819388	21	44471849	B7H2	A	G	DOM	202	216	164	167	749	0.1103	1	0.7398	249.313	0.943104	0.952292	1.0501
rs11558819	21	44481202	B7H2	T	C	DOM	186	234	166	164	750	2.687	1	0.1012	34.1044	0.52038	0.785295	1.27341
rs378299	21	44485771	B7H2	C	T	DOM	276	133	238	93	740	1.686	1	0.1941	65.4117	0.62336	0.810893	1.23321
Legend
SNP	rsID for Single Nucleotide Polymorphism
CHR	Chromosome
Position	Genomic Position
Gene	HUGO gene name
D (minor Allele)	Minor allele according to the frequency reported for this dataset
d (major Allele)	Major allele according to the frequency reported for this dataset
TEST	Association test performed
Symptomatic DD	DD Genotypes in symptomatic cases
Symptomatic Dd	Dd Genotypes in symptomatic cases
Symptomatic dd	dd Genotypes in symptomatic cases
Asymptomatic DD	DD Genotypes in asymptomatic controls
Asymptomatic Dd	DD Genotypes in asymptomatic controls
Asymptomatic dd	DD Genotypes in asymptomatic controls
n	Number of individuals included in the analysis
CHISQ	Chi-squared test statistic
DF	Degrees of Freedom
P-value	Asymptotic p-value for chi-square statistic
Bonferroni p-value	Bonferroni corrected p-value
OR Minor Allele	Odds ratio calculated for the minor allele
OR Major Allele	Odds ratio calculated for the major allele
