# Supplementary material for: Host Genetic Risk Factors for West Nile Virus Infection and Disease Progression
Source: PLoS One. 2011 Sep 15;6(9):e24745. doi: 10.1371/journal.pone.0024745 (PMC3174177; doi:10.1371/journal.pone.0024745)
Supplement: Table S6 — Symptomatic vs. asymptomatic logistic regression analysis results for an additive model of inheritance. (XLS) [file pone.0024745.s006.xls]

## Sheet: Sheet1
Table S6. Symptomatic vs. asymptomatic logistic regression analysis results for an additive model of inheritance. Odds Ratios were calculated using logistic regression. The first five PC's were included as covariates to control for population stratification.
SNP	CHR	Position	Gene	Minor Allele	Major Allele	TEST	n	OR Minor Allele	OR Major Allele	SE	L95 Minor Allele	U95 Minor Allele	L95 Major Allele	U95 Major Allele	STAT	P-value	Bonferroni P-Value
rs2254002	1	65074257	JAK1	T	G	ADD	751	0.8176	1.223	0.1892	0.5642	1.185	0.8441	1.772	-1.064	0.2871	96.7527
rs4916004	1	65076098	JAK1	A	G	ADD	750	1.427	0.701	0.1983	0.9672	2.104	0.4753	1.034	1.792	0.0732	24.6684
rs310244	1	65078465	JAK1	T	C	ADD	750	0.6825	1.465	0.1796	0.48	0.9705	1.03	2.083	-2.127	0.03346	11.276
rs310247	1	65079997	JAK1	T	C	ADD	750	0.7568	1.321	0.2021	0.5093	1.125	0.8892	1.963	-1.379	0.1679	56.5823
rs2230587	1	65083850	JAK1	T	C	ADD	752	1.146	0.8727	0.1655	0.8284	1.585	0.6309	1.207	0.8228	0.4106	138.372
rs10789166	1	65085401	JAK1	G	A	ADD	752	0.6377	1.568	0.2006	0.4304	0.9449	1.058	2.323	-2.242	0.02494	8.40478
rs310219	1	65087886	JAK1	T	C	ADD	749	0.6628	1.509	0.1928	0.4542	0.9672	1.034	2.202	-2.133	0.03292	11.094
rs188698	1	65091172	JAK1	C	T	ADD	752	0.6723	1.487	0.1785	0.4738	0.9539	1.048	2.111	-2.224	0.02613	8.80581
rs2256298	1	65103270	JAK1	T	C	ADD	745	0.8857	1.129	0.146	0.6653	1.179	0.848	1.503	-0.8312	0.4058	136.755
rs11585932	1	65107683	JAK1	G	A	ADD	745	0.9841	1.016	0.2094	0.6528	1.484	0.674	1.532	-0.07651	0.939	316.443
rs12135754	1	65115093	JAK1	C	A	ADD	752	1.347	0.7426	0.2	0.91	1.993	0.5018	1.099	1.489	0.1366	46.0342
rs310201	1	65122196	JAK1	C	T	ADD	752	1.01	0.9899	0.171	0.7224	1.412	0.708	1.384	0.0591	0.9529	321.127
rs310199	1	65122710	JAK1	C	T	ADD	752	1.035	0.9659	0.1554	0.7635	1.404	0.7123	1.31	0.2236	0.8231	277.385
rs310198	1	65123656	JAK1	A	G	ADD	750	0.6406	1.561	0.2249	0.4122	0.9955	1.005	2.426	-1.98	0.04771	16.0783
rs10802189	1	116858253	CD58	A	G	ADD	748	1.001	0.999	0.1128	0.8025	1.249	0.8009	1.246	0.008556	0.9932	334.708
rs17036001	1	116916652	CD58	A	G	ADD	745	0.9819	1.018	0.2306	0.6248	1.543	0.6481	1.6	-0.07931	0.9368	315.702
rs1335531	1	116916900	CD58	G	C	ADD	746	0.8693	1.15	0.1251	0.6803	1.111	0.9003	1.47	-1.12	0.2627	88.5299
rs6701046	1	117099257	CD2	G	A	ADD	748	1.048	0.9541	0.1279	0.8157	1.347	0.7425	1.226	0.3673	0.7134	240.416
rs3136705	1	117104923	CD2	A	G	ADD	752	0.8804	1.136	0.1573	0.6469	1.198	0.8346	1.546	-0.8101	0.4179	140.832
rs798043	1	117105020	CD2	T	C	ADD	752	1.131	0.8841	0.1265	0.8827	1.449	0.6899	1.133	0.974	0.3301	111.244
rs1801274	1	159746369	FCGR2A	T	C	ADD	752	0.9995	1.001	0.1011	0.8199	1.218	0.8207	1.22	-0.005258	0.9958	335.585
rs627839	1	180808704	RNASEL	A	C	ADD	750	1.009	0.9912	0.1111	0.8115	1.254	0.7973	1.232	0.07958	0.9366	315.634
rs11072	1	180809954	RNASEL	C	T	ADD	748	0.938	1.066	0.1201	0.7413	1.187	0.8425	1.349	-0.5329	0.5941	200.212
rs672527	1	180811844	RNASEL	A	G	ADD	751	1.015	0.9852	0.1198	0.8026	1.284	0.779	1.246	0.1246	0.9008	303.57
rs533259	1	180815642	RNASEL	T	C	ADD	749	1.664	0.6008	0.2448	1.03	2.689	0.3718	0.9708	2.081	0.03742	12.6105
rs627928	1	180817960	RNASEL	T	G	ADD	753	0.8442	1.185	0.1078	0.6834	1.043	0.959	1.463	-1.572	0.1161	39.1257
rs486907	1	180821180	RNASEL	T	C	ADD	753	1.064	0.9402	0.116	0.8473	1.335	0.749	1.18	0.5312	0.5953	200.616
rs3024498	1	205008152	IL10	C	T	ADD	747	1.081	0.9251	0.1283	0.8406	1.39	0.7194	1.19	0.6068	0.544	183.328
rs3024496	1	205008487	IL10	C	T	ADD	749	1.039	0.9623	0.1121	0.8342	1.294	0.7725	1.199	0.3428	0.7318	246.617
rs3024509	1	205009920	IL10	C	T	ADD	750	0.703	1.422	0.2238	0.4534	1.09	0.9174	2.206	-1.575	0.1153	38.8561
rs3021094	1	205011575	IL10	G	T	ADD	753	1.271	0.787	0.1919	0.8723	1.851	0.5403	1.146	1.248	0.212	71.444
rs1800871	1	205013257	IL10	T	C	ADD	749	0.9892	1.011	0.1266	0.7718	1.268	0.7888	1.296	-0.08579	0.9316	313.949
rs1800896	1	205013520	IL10	C	T	ADD	751	1.019	0.9818	0.1124	0.8172	1.27	0.7877	1.224	0.1637	0.87	293.19
rs3770768	2	37199655	EIF2AK2	T	C	ADD	751	0.9761	1.025	0.1559	0.7191	1.325	0.7548	1.391	-0.1554	0.8765	295.38
rs4648212	2	37206515	EIF2AK2	T	C	ADD	749	1.202	0.8316	0.2346	0.7593	1.904	0.5251	1.317	0.786	0.4318	145.517
rs4670185	2	37209038	EIF2AK2	G	A	ADD	752	1.168	0.8565	0.2197	0.759	1.796	0.5568	1.318	0.7049	0.4809	162.063
rs4648186	2	37220611	EIF2AK2	T	C	ADD	750	0.9982	1.002	0.1488	0.7458	1.336	0.7484	1.341	-0.01196	0.9905	333.798
rs4648184	2	37220999	EIF2AK2	A	T	ADD	753	1.423	0.7026	0.3248	0.753	2.691	0.3717	1.328	1.087	0.2771	93.3827
rs2373114	2	37226754	EIF2AK2	A	G	ADD	748	1.627	0.6148	0.2062	1.086	2.436	0.4104	0.9209	2.359	0.0183	6.1671
rs2254958	2	37229795	EIF2AK2	T	C	ADD	747	0.9695	1.031	0.1095	0.7822	1.202	0.8322	1.278	-0.2827	0.7774	261.984
rs12712526	2	37236819	EIF2AK2	G	A	ADD	742	1.171	0.854	0.1067	0.9501	1.443	0.6929	1.053	1.48	0.1389	46.8093
rs7340267	2	37237964	EIF2AK2	G	A	ADD	740	1.182	0.846	0.1068	0.9588	1.457	0.6862	1.043	1.566	0.1172	39.4964
rs1990760	2	162832297	IFIH1	G	A	ADD	751	0.8705	1.149	0.1115	0.6996	1.083	0.9232	1.429	-1.244	0.2136	71.9832
rs3747517	2	162837070	IFIH1	T	C	ADD	751	0.8938	1.119	0.1178	0.7095	1.126	0.8881	1.409	-0.9529	0.3407	114.816
rs13023380	2	162862609	IFIH1	A	G	ADD	748	1.225	0.8164	0.1029	1.001	1.499	0.6673	0.9987	1.972	0.04859	16.3748
rs17715343	2	162875992	IFIH1	G	C	ADD	752	0.7634	1.31	0.2032	0.5126	1.137	0.8796	1.951	-1.328	0.184	62.008
rs2059691	2	179010130	PRKRA	A	G	ADD	751	0.7259	1.378	0.1183	0.5757	0.9152	1.093	1.737	-2.709	0.006755	2.27643
rs2288320	2	179016748	PRKRA	C	A	ADD	749	0.9775	1.023	0.1421	0.7398	1.292	0.7743	1.352	-0.1601	0.8728	294.134
rs3752689	2	179020859	PRKRA	G	A	ADD	747	1.128	0.8868	0.1332	0.8685	1.464	0.683	1.151	0.9015	0.3673	123.78
rs3771300	2	191543841	STAT1	G	T	ADD	751	0.8324	1.201	0.1057	0.6766	1.024	0.9765	1.478	-1.735	0.08275	27.8868
rs2066804	2	191550004	STAT1	T	C	ADD	751	1.014	0.986	0.1246	0.7945	1.295	0.7724	1.259	0.1133	0.9098	306.603
rs12693591	2	191568747	STAT1	A	C	ADD	753	0.9795	1.021	0.1472	0.734	1.307	0.7651	1.362	-0.1408	0.888	299.256
rs10173099	2	191575577	STAT1	A	G	ADD	753	0.8599	1.163	0.1112	0.6915	1.069	0.9352	1.446	-1.357	0.1746	58.8402
rs1879877	2	204278245	CD28	T	G	ADD	750	0.9201	1.087	0.1183	0.7297	1.16	0.862	1.37	-0.7042	0.4813	162.198
rs3181096	2	204278337	CD28	A	G	ADD	721	1.025	0.9757	0.1058	0.833	1.261	0.793	1.2	0.2328	0.8159	274.958
rs3116494	2	204300266	CD28	G	A	ADD	752	1.049	0.9533	0.1232	0.824	1.336	0.7488	1.214	0.3886	0.6976	235.091
rs16840252	2	204439764	CTLA4	A	G	ADD	751	1.11	0.9007	0.1443	0.8367	1.473	0.6788	1.195	0.7247	0.4686	157.918
rs11571317	2	204440253	CTLA4	A	G	ADD	753	0.9501	1.053	0.1825	0.6645	1.359	0.7361	1.505	-0.2805	0.7791	262.557
rs5742909	2	204440592	CTLA4	A	G	ADD	749	0.8905	1.123	0.1856	0.619	1.281	0.7806	1.616	-0.6252	0.5319	179.25
rs41265961	2	204444106	CTLA4	A	G	ADD	752	0.791	1.264	0.2584	0.4767	1.313	0.7618	2.098	-0.9072	0.3643	122.769
rs11883722	2	204509090	ICOS	A	G	ADD	741	0.9282	1.077	0.1311	0.7178	1.2	0.8332	1.393	-0.568	0.57	192.09
rs4264550	2	204529739	ICOS	A	G	ADD	751	0.985	1.015	0.1595	0.7205	1.347	0.7426	1.388	-0.09478	0.9245	311.556
rs10183087	2	204532569	ICOS	C	A	ADD	752	1.038	0.9637	0.1277	0.8079	1.333	0.7503	1.238	0.2894	0.7723	260.265
rs10932035	2	204532897	ICOS	A	G	ADD	753	1.041	0.9607	0.1727	0.7421	1.46	0.6849	1.348	0.2322	0.8164	275.127
rs6705653	2	242442232	PDCD1	T	C	ADD	743	0.9989	1.001	0.1078	0.8087	1.234	0.8105	1.237	-0.01027	0.9918	334.237
PDCD1_008885	2	242442870	PCDC1	C	G	ADD	743	1.229	0.8134	0.2654	0.7308	2.068	0.4835	1.368	0.7782	0.4364	147.067
rs7419333	2	242443985	PDCD1	G	C	ADD	742	1.069	0.9358	0.1164	0.8506	1.343	0.7449	1.176	0.57	0.5687	191.652
rs4988457	3	38157140	MYD88	G	C	ADD	749	1.444	0.6923	0.2527	0.8802	2.37	0.4219	1.136	1.455	0.1456	49.0672
rs7744	3	38159025	MYD88	G	A	ADD	753	0.8457	1.182	0.1445	0.6372	1.122	0.8909	1.569	-1.16	0.246	82.902
rs6853	3	38159374	MYD88	G	A	ADD	753	1.364	0.7329	0.166	0.9855	1.889	0.5293	1.015	1.872	0.0612	20.6244
rs1799988	3	46387263	CCR5	A	G	ADD	745	0.8782	1.139	0.1081	0.7106	1.085	0.9213	1.407	-1.201	0.2296	77.3752
rs352140	3	52231737	TLR9	G	A	ADD	750	1.008	0.9918	0.105	0.8207	1.239	0.8073	1.219	0.07797	0.9378	316.039
rs187084	3	52236071	TLR9	C	T	ADD	750	0.9412	1.062	0.1055	0.7654	1.157	0.864	1.306	-0.5744	0.5657	190.641
rs17281703	3	120726239	CD80	A	G	ADD	750	0.8511	1.175	0.1644	0.6166	1.175	0.8512	1.622	-0.9804	0.3269	110.165
rs1599796	3	120726624	CD80	A	G	ADD	750	0.9942	1.006	0.1315	0.7683	1.287	0.7772	1.302	-0.044	0.9649	325.171
rs7628626	3	120727111	CD80	A	C	ADD	753	1.307	0.7649	0.1371	0.9994	1.71	0.5847	1.001	1.955	0.05055	17.0353
rs2629396	3	120731657	CD80	G	T	ADD	752	1.091	0.9167	0.1083	0.8823	1.349	0.7415	1.133	0.803	0.422	142.214
rs2228017	3	120746370	CD80	A	G	ADD	752	0.9352	1.069	0.1154	0.7459	1.172	0.8529	1.341	-0.5811	0.5611	189.091
rs9282638	3	120746460	CD80	C	T	ADD	752	1.093	0.9152	0.1454	0.8217	1.453	0.6883	1.217	0.6092	0.5424	182.789
rs16829980	3	120761158	CD80	G	A	ADD	746	1.229	0.8135	0.1698	0.8813	1.715	0.5832	1.135	1.216	0.224	75.488
rs16829984	3	120761230	CD80	C	G	ADD	750	0.9506	1.052	0.1642	0.689	1.312	0.7624	1.451	-0.3082	0.758	255.446
rs1880661	3	120761538	CD80	T	C	ADD	752	1.23	0.8132	0.1044	1.002	1.509	0.6628	0.9978	1.981	0.04761	16.0446
CD80_035889	3	120795177	CD80	A	G	ADD	750	0.8729	1.146	0.1281	0.679	1.122	0.8912	1.473	-1.061	0.2887	97.2919
rs2681417	3	123307887	CD86	G	A	ADD	753	1.135	0.881	0.2062	0.7576	1.701	0.5881	1.32	0.6142	0.5391	181.677
rs1129055	3	123321009	CD86	A	G	ADD	751	1.085	0.9213	0.121	0.8562	1.376	0.7267	1.168	0.6772	0.4983	167.927
rs17281995	3	123322331	CD86	G	C	ADD	753	1.212	0.8251	0.1522	0.8994	1.633	0.6122	1.112	1.263	0.2065	69.5905
rs2305619	3	158637555	PTX3	A	G	ADD	747	1.039	0.9623	0.1033	0.8488	1.272	0.7859	1.178	0.3725	0.7095	239.102
rs3845978	3	158642388	PTX3	A	G	ADD	751	0.9013	1.109	0.2571	0.5446	1.492	0.6703	1.836	-0.404	0.6862	231.249
rs3911403	3	158644821	PTX3	T	A	ADD	749	1.178	0.8487	0.2126	0.7768	1.787	0.5595	1.287	0.772	0.4401	148.314
rs3921	4	77161967	CXCL10	C	G	ADD	749	0.9228	1.084	0.1133	0.739	1.152	0.8678	1.353	-0.7087	0.4785	161.255
rs4256246	4	77164546	CXCL10	A	G	ADD	750	1.078	0.9278	0.1442	0.8124	1.43	0.6994	1.231	0.5195	0.6034	203.346
rs230525	4	103677907	NFKB1	G	A	ADD	751	1.024	0.9762	0.1139	0.8195	1.281	0.7809	1.22	0.2119	0.8322	280.451
rs4648050	4	103733779	NFKB1	G	A	ADD	749	1.127	0.8877	0.1161	0.8973	1.414	0.707	1.115	1.026	0.3048	102.718
rs4648095	4	103746914	NFKB1	G	A	ADD	752	1.221	0.8189	0.247	0.7525	1.982	0.5046	1.329	0.8088	0.4186	141.068
rs1049253	4	185785945	CASP3	C	T	ADD	750	1.004	0.9962	0.1349	0.7707	1.308	0.7648	1.298	0.02847	0.9773	329.35
rs2705897	4	185790092	CASP3	A	C	ADD	750	0.9373	1.067	0.1208	0.7397	1.188	0.8419	1.352	-0.5358	0.5921	199.538
rs2720376	4	185791294	CASP3	G	A	ADD	751	0.9764	1.024	0.1115	0.7847	1.215	0.8231	1.274	-0.2141	0.8305	279.879
rs2705901	4	185796481	CASP3	G	C	ADD	752	0.8681	1.152	0.1438	0.6548	1.151	0.869	1.527	-0.9838	0.3252	109.592
rs4647610	4	185804925	CASP3	T	C	ADD	752	0.9314	1.074	0.1524	0.6909	1.256	0.7964	1.447	-0.4661	0.6411	216.051
rs2720378	4	185805107	CASP3	C	G	ADD	741	1.014	0.9862	0.1182	0.8043	1.278	0.7822	1.243	0.118	0.9061	305.356
rs4647603	4	185806724	CASP3	T	C	ADD	730	1.025	0.9752	0.1499	0.7644	1.376	0.7269	1.308	0.1674	0.867	292.179
rs3775296	4	187234761	TLR3	T	G	ADD	753	0.9971	1.003	0.13	0.7728	1.286	0.7773	1.294	-0.0224	0.9821	330.968
rs1879026	4	187237315	TLR3	T	G	ADD	751	1.029	0.9721	0.1424	0.7782	1.36	0.7354	1.285	0.1984	0.8427	283.99
rs3775291	4	187241068	TLR3	T	C	ADD	750	0.8687	1.151	0.1158	0.6923	1.09	0.9174	1.444	-1.215	0.2242	75.5554
rs3775290	4	187241211	TLR3	T	C	ADD	753	1.031	0.9702	0.1138	0.8248	1.288	0.7763	1.212	0.2663	0.79	266.23
rs2069187	5	54433806	GZMA	C	T	ADD	752	1.124	0.8898	0.148	0.8409	1.502	0.6657	1.189	0.789	0.4301	144.944
rs1051846	5	54439814	GZMA	C	G	ADD	752	1.276	0.784	0.1727	0.9093	1.789	0.5589	1.1	1.409	0.1587	53.4819
rs839	5	131847025	IRF1	T	C	ADD	702	1.309	0.764	0.1199	1.035	1.656	0.6039	0.9664	2.245	0.02475	8.34075
rs2070729	5	131847820	IRF1	T	G	ADD	745	1.256	0.7963	0.1114	1.009	1.562	0.6401	0.9907	2.044	0.04097	13.8069
rs17622656	5	131848896	IRF1	A	G	ADD	746	0.873	1.145	0.1119	0.7011	1.087	0.92	1.426	-1.214	0.2246	75.6902
rs1800630	6	31650455	TNF	A	C	ADD	747	0.9185	1.089	0.1446	0.6918	1.219	0.8201	1.445	-0.5879	0.5566	187.574
rs3093662	6	31652168	TNF	G	A	ADD	746	0.9914	1.009	0.1964	0.6746	1.457	0.6864	1.482	-0.04409	0.9648	325.138
rs11914	6	137561281	IFNGR1	G	T	ADD	750	0.8441	1.185	0.142	0.639	1.115	0.8968	1.565	-1.193	0.2328	78.4536
rs3799488	6	137561473	IFNGR1	G	A	ADD	751	0.8901	1.124	0.1476	0.6665	1.189	0.8414	1.5	-0.7893	0.4299	144.876
rs1327474	6	137582768	IFNGR1	C	T	ADD	747	1.034	0.9671	0.1076	0.8374	1.277	0.7833	1.194	0.3106	0.7561	254.806
rs752637	7	128366656	IRF5	T	C	ADD	748	1.045	0.9567	0.1101	0.8424	1.297	0.7711	1.187	0.4017	0.6879	231.822
rs3807306	7	128367916	IRF5	T	G	ADD	748	1.166	0.8576	0.109	0.9419	1.444	0.6927	1.062	1.41	0.1585	53.4145
rs1874328	7	128372340	IRF5	C	T	ADD	750	1.01	0.9901	0.1112	0.8122	1.256	0.7962	1.231	0.08934	0.9288	313.006
rs10108662	8	39899146	INDO	A	C	ADD	750	1.031	0.9701	0.1134	0.8254	1.287	0.7768	1.212	0.2673	0.7892	265.96
rs3739319	8	39904478	INDO	A	G	ADD	752	1.191	0.8397	0.109	0.9618	1.475	0.6781	1.04	1.603	0.1089	36.6993
rs268561	8	71656476	TRAM1	G	A	ADD	751	0.8645	1.157	0.1106	0.696	1.074	0.9313	1.437	-1.317	0.1879	63.3223
rs7011101	8	71664028	TRAM1	C	A	ADD	751	1.121	0.8923	0.1635	0.8135	1.544	0.6477	1.229	0.6972	0.4857	163.681
rs3816745	8	71669188	TRAM1	C	G	ADD	752	0.9874	1.013	0.1087	0.798	1.222	0.8185	1.253	-0.1165	0.9072	305.726
rs17686100	8	71669566	TRAM1	G	A	ADD	753	1.625	0.6152	0.2096	1.078	2.451	0.408	0.9277	2.318	0.02046	6.89502
rs268594	8	71675684	TRAM1	A	G	ADD	748	1.218	0.8208	0.1196	0.9638	1.54	0.6493	1.038	1.652	0.0986	33.2282
rs268598	8	71677425	TRAM1	G	A	ADD	751	0.8258	1.211	0.1948	0.5637	1.21	0.8266	1.774	-0.9825	0.3258	109.795
rs268600	8	71680925	TRAM1	G	A	ADD	718	0.9991	1.001	0.245	0.6181	1.615	0.6191	1.618	-0.003486	0.9972	336.056
rs10429491	9	5040706	JAK2	A	G	ADD	751	0.9617	1.04	0.1203	0.7597	1.218	0.8213	1.316	-0.3242	0.7458	251.335
rs2230724	9	5071780	JAK2	G	A	ADD	750	1.038	0.9634	0.1102	0.8363	1.288	0.7762	1.196	0.338	0.7354	247.83
rs12340866	9	5084185	JAK2	A	G	ADD	749	0.9196	1.087	0.1255	0.7191	1.176	0.8504	1.391	-0.6685	0.5038	169.781
rs3780378	9	5102288	JAK2	G	A	ADD	748	1.114	0.8977	0.1118	0.8949	1.387	0.7211	1.117	0.9662	0.334	112.558
rs3780379	9	5102519	JAK2	A	G	ADD	747	0.9977	1.002	0.1392	0.7595	1.311	0.7629	1.317	-0.01625	0.987	332.619
rs10815160	9	5106616	JAK2	C	A	ADD	750	1.025	0.976	0.1246	0.8025	1.308	0.7644	1.246	0.195	0.8454	284.9
rs822336	9	5438690	PDCD1L1	G	C	ADD	750	0.9487	1.054	0.1148	0.7575	1.188	0.8416	1.32	-0.4584	0.6467	217.938
rs12002985	9	5446587	PDCD1L1	G	C	ADD	752	1.106	0.9045	0.1098	0.8916	1.371	0.7294	1.122	0.9145	0.3605	121.489
rs17804441	9	5447733	PDCD1L1	G	A	ADD	751	0.8064	1.24	0.124	0.6324	1.028	0.9724	1.581	-1.735	0.08282	27.9103
rs2297137	9	5455732	PDCD1L1	T	C	ADD	737	0.9256	1.08	0.1336	0.7124	1.203	0.8315	1.404	-0.5784	0.563	189.731
PDCD1L1_017464	9	5456085	PDCD1L	G	A	ADD	750	0.7339	1.363	0.1294	0.5695	0.9458	1.057	1.756	-2.391	0.01682	5.66834
PDCD1L1_019180	9	5457801	PDCD1L1	A	G	ADD	753	0.9639	1.037	0.2285	0.616	1.509	0.6629	1.624	-0.1607	0.8723	293.965
rs2297136	9	5457955	PDCD1L1	C	T	ADD	751	1.332	0.7508	0.1082	1.077	1.647	0.6073	0.9281	2.649	0.00807	2.71959
rs4143815	9	5458257	PDCD1L1	C	G	ADD	748	0.8118	1.232	0.1189	0.6431	1.025	0.9758	1.555	-1.754	0.07947	26.7814
rs16923189	9	5500644	PDCD1LG2	G	A	ADD	751	0.7538	1.327	0.118	0.5981	0.9499	1.053	1.672	-2.395	0.01662	5.60094
rs7854413	9	5547708	PDCD1LG2	G	A	ADD	752	0.8975	1.114	0.1655	0.6489	1.241	0.8056	1.541	-0.6536	0.5134	173.016
rs7852996	9	5559860	PDCD1LG2	T	A	ADD	750	0.8595	1.163	0.1701	0.6158	1.2	0.8336	1.624	-0.89	0.3735	125.87
rs1051922	9	21067716	IFNB1	T	C	ADD	751	1.089	0.9187	0.1169	0.8657	1.369	0.7306	1.155	0.7258	0.468	157.716
rs28383793	9	21430416	IFNA	G	A	ADD	753	1.532	0.6527	0.2775	0.8894	2.64	0.3789	1.124	1.538	0.1242	41.8554
rs12685904	9	21431310	IFNA	C	A	ADD	750	0.8176	1.223	0.3198	0.4368	1.53	0.6535	2.289	-0.6298	0.5288	178.206
rs10985085	9	122705118	TRAF1	A	G	ADD	752	1.239	0.8068	0.2276	0.7935	1.936	0.5165	1.26	0.9433	0.3455	116.433
rs4836834	9	122705722	TRAF1	T	A	ADD	753	1.02	0.9808	0.1092	0.8231	1.263	0.7918	1.215	0.1773	0.8593	289.584
rs2239657	9	122711341	TRAF1	G	A	ADD	744	0.9372	1.067	0.1103	0.755	1.163	0.8596	1.324	-0.5883	0.5564	187.507
rs13440146	9	122721272	TRAF1	A	C	ADD	742	0.9957	1.004	0.2024	0.6696	1.481	0.6754	1.493	-0.02131	0.983	331.271
rs10824792	10	54196212	MBL2	G	A	ADD	750	1.07	0.9347	0.1098	0.8628	1.327	0.7537	1.159	0.6153	0.5383	181.407
rs11595876	10	54196768	MBL2	G	A	ADD	753	1.139	0.8779	0.2069	0.7593	1.709	0.5852	1.317	0.6294	0.5291	178.307
rs930507	10	54198272	MBL2	G	C	ADD	750	1.01	0.9896	0.1422	0.7647	1.335	0.7489	1.308	0.07326	0.9416	317.319
rs1838066	10	54199331	MBL2	G	A	ADD	752	0.9358	1.069	0.1118	0.7517	1.165	0.8584	1.33	-0.594	0.5525	186.192
rs10824793	10	54199486	MBL2	G	A	ADD	752	1.079	0.9271	0.1067	0.8751	1.329	0.7523	1.143	0.7093	0.4781	161.12
rs4647964	10	54201105	MBL2	G	G	ADD	718	NA	NA	NA	NA	NA	NA	NA	NA	NA	NA
rs1800450	10	54201241	MBL2	T	C	ADD	753	1.04	0.9613	0.158	0.7631	1.418	0.7053	1.31	0.2494	0.803	270.611
rs1889490	10	72027719	PRF1	T	C	ADD	749	0.7731	1.293	0.1094	0.6238	0.9581	1.044	1.603	-2.351	0.0187	6.3019
rs35069510	10	72032901	PRF1	T	C	ADD	747	1.009	0.9914	0.189	0.6965	1.461	0.6846	1.436	0.04558	0.9636	324.733
rs1800682	10	90739943	FAS	C	T	ADD	748	1.121	0.8918	0.105	0.9128	1.377	0.726	1.096	1.091	0.2754	92.8098
rs2234978	10	90761809	FAS	A	G	ADD	749	1.028	0.9731	0.1166	0.8177	1.292	0.7742	1.223	0.2342	0.8148	274.588
rs1051070	10	90764752	FAS	T	A	ADD	746	1.104	0.9062	0.1877	0.7639	1.594	0.6273	1.309	0.525	0.5996	202.065
rs17468739	10	91055929	IFIT2	C	A	ADD	749	0.7232	1.383	0.1403	0.5492	0.9521	1.05	1.821	-2.309	0.02092	7.05004
rs2070845	10	91056055	IFIT2	G	A	ADD	751	0.912	1.097	0.1207	0.7199	1.155	0.8655	1.389	-0.7634	0.4452	150.032
rs954439	10	91056440	IFIT2	T	A	ADD	712	0.8314	1.203	0.11	0.6701	1.032	0.9694	1.492	-1.678	0.09337	31.4657
rs1727	10	91056749	IFIT2	C	A	ADD	750	0.8352	1.197	0.1197	0.6606	1.056	0.947	1.514	-1.505	0.1324	44.6188
rs303215	10	91146811	IFIT1	G	A	ADD	752	1.124	0.8899	0.1317	0.8681	1.455	0.6875	1.152	0.886	0.3756	126.577
rs11203109	10	91147139	IFIT1	G	A	ADD	751	0.9574	1.045	0.1162	0.7624	1.202	0.8318	1.312	-0.3748	0.7078	238.529
rs304485	10	91149890	IFIT1	A	T	ADD	750	0.9334	1.071	0.1066	0.7574	1.15	0.8693	1.32	-0.646	0.5183	174.667
rs303212	10	91151335	IFIT1	G	A	ADD	752	1.131	0.884	0.1214	0.8918	1.435	0.6969	1.121	1.016	0.3096	104.335
rs303211	10	91152477	IFIT1	A	G	ADD	752	1.134	0.8815	0.2558	0.6872	1.873	0.534	1.455	0.4933	0.6218	209.547
rs3809112	11	297036	IFITM2	G	A	ADD	749	1.285	0.7782	0.1055	1.045	1.58	0.6328	0.957	2.376	0.01748	5.89076
rs11246062	11	303755	IFITM1	G	C	ADD	749	1.17	0.8547	0.1157	0.9326	1.468	0.6813	1.072	1.357	0.1749	58.9413
rs3758650	11	606865	IRF7	A	G	ADD	739	0.6856	1.459	0.2374	0.4305	1.092	0.9159	2.323	-1.59	0.1118	37.6766
rs731909	11	2365200	CD81	C	G	ADD	750	0.9433	1.06	0.1517	0.7007	1.27	0.7875	1.427	-0.3851	0.7002	235.967
rs800335	11	2367517	CD81	G	A	ADD	745	1.028	0.9725	0.1368	0.7864	1.344	0.7438	1.272	0.2039	0.8384	282.541
rs3740961	11	36466647	TRAF6	C	T	ADD	751	1.041	0.9608	0.1551	0.7679	1.41	0.709	1.302	0.2575	0.7968	268.522
rs331457	11	36480188	TRAF6	T	C	ADD	749	0.8677	1.153	0.1584	0.6362	1.183	0.845	1.572	-0.8964	0.37	124.69
rs5030419	11	36487319	TRAF6	G	C	ADD	748	1.456	0.6868	0.1669	1.05	2.019	0.4952	0.9525	2.251	0.02437	8.21269
rs7127254	11	46265125	CREB3L1	A	G	ADD	752	0.9047	1.105	0.1266	0.7059	1.159	0.8625	1.417	-0.7917	0.4286	144.438
rs11038852	11	46270467	CREB3L1	G	C	ADD	750	0.9722	1.029	0.1161	0.7743	1.221	0.8193	1.291	-0.243	0.808	272.296
rs4625425	11	46289469	CREB3L1	C	A	ADD	750	0.7734	1.293	0.1425	0.5849	1.023	0.9779	1.71	-1.803	0.07136	24.0483
rs2288249	11	46290815	CREB3L1	A	G	ADD	750	1.514	0.6606	0.2193	0.9851	2.327	0.4298	1.015	1.891	0.05859	19.7448
rs4963271	11	63061760	RARRES3	G	A	ADD	750	1.342	0.7454	0.1372	1.025	1.755	0.5697	0.9754	2.141	0.03225	10.8682
rs1131715	11	69731135	FADD	G	A	ADD	750	0.878	1.139	0.1101	0.7075	1.09	0.9178	1.413	-1.181	0.2376	80.0712
rs7115875	11	75737878	PRKRIR	G	A	ADD	745	1.1	0.9092	0.1689	0.7899	1.531	0.653	1.266	0.5634	0.5731	193.135
rs3824908	11	75754968	PRKRIR	C	A	ADD	751	0.9123	1.096	0.1269	0.7115	1.17	0.8548	1.406	-0.7234	0.4694	158.188
rs7925910	11	75765047	PRKRIR	G	A	ADD	749	1.071	0.9334	0.1573	0.7872	1.458	0.6858	1.27	0.4383	0.6612	222.824
rs4320976	11	75765492	PRKRIR	A	G	ADD	752	0.8535	1.172	0.1387	0.6503	1.12	0.8928	1.538	-1.142	0.2533	85.3621
rs4252249	11	117364419	IL10RA	A	G	ADD	747	0.9672	1.034	0.1676	0.6963	1.343	0.7443	1.436	-0.1988	0.8424	283.889
rs2508450	11	117369039	IL10RA	A	G	ADD	753	0.845	1.183	0.1133	0.6767	1.055	0.9477	1.478	-1.486	0.1374	46.3038
rs3135932	11	117369273	IL10RA	G	A	ADD	752	0.9893	1.011	0.1449	0.7447	1.314	0.761	1.343	-0.07451	0.9406	316.982
rs4252314	11	117373727	IL10RA	G	A	ADD	752	1.338	0.7474	0.313	0.7244	2.471	0.4047	1.38	0.9301	0.3523	118.725
rs2229113	11	117374880	IL10RA	A	G	ADD	749	0.7728	1.294	0.121	0.6097	0.9796	1.021	1.64	-2.13	0.03315	11.1715
rs9610	11	117377296	IL10RA	A	G	ADD	753	1.031	0.9699	0.1127	0.8267	1.286	0.7777	1.21	0.2712	0.7862	264.949
rs8177352	11	125659053	TIRAP	G	A	ADD	739	0.9841	1.016	0.1304	0.7622	1.271	0.787	1.312	-0.1231	0.9021	304.008
rs3802813	11	125667678	TIRAP	A	G	ADD	751	1.136	0.8806	0.271	0.6677	1.931	0.5178	1.498	0.4691	0.639	215.343
rs3802814	11	125667817	TIRAP	A	G	ADD	751	0.942	1.062	0.1426	0.7123	1.246	0.8027	1.404	-0.4188	0.6753	227.576
rs8177375	11	125668274	TIRAP	G	A	ADD	752	0.8399	1.191	0.1659	0.6067	1.163	0.86	1.648	-1.051	0.2931	98.7747
rs8177376	11	125668822	TIRAP	C	A	ADD	751	0.8718	1.147	0.1254	0.6818	1.115	0.8971	1.467	-1.094	0.2739	92.3043
rs625413	11	125669559	TIRAP	A	G	ADD	752	1.139	0.8777	0.1266	0.8889	1.46	0.6848	1.125	1.03	0.303	102.111
rs1786704	11	125670967	TIRAP	G	A	ADD	751	1.107	0.9032	0.1284	0.861	1.424	0.7023	1.162	0.7936	0.4275	144.067
rs17199006	12	7775618	CLEC4C	G	A	ADD	752	0.8734	1.145	0.1436	0.6591	1.157	0.8641	1.517	-0.9427	0.3458	116.535
rs1894823	12	7781816	CLEC4C	A	G	ADD	750	0.7695	1.299	0.1259	0.6013	0.9849	1.015	1.663	-2.081	0.03746	12.624
rs10845821	12	7791451	CLEC4C	A	G	ADD	751	1.118	0.8946	0.1132	0.8954	1.395	0.7166	1.117	0.9839	0.3251	109.559
rs4251460	12	42449035	IRAK4	C	A	ADD	750	1.234	0.8101	0.1706	0.8836	1.725	0.5799	1.132	1.235	0.2169	73.0953
rs4251513	12	42460471	IRAK4	G	C	ADD	751	1.183	0.8451	0.1099	0.954	1.468	0.6813	1.048	1.531	0.1257	42.3609
rs4251580	12	42461033	IRAK4	A	G	ADD	750	0.9673	1.034	0.1593	0.708	1.322	0.7566	1.413	-0.2085	0.8349	281.361
rs4251520	12	42461605	IRAK4	G	A	ADD	749	1.093	0.9151	0.1679	0.7864	1.519	0.6585	1.272	0.5284	0.5972	201.256
rs4251545	12	42466562	IRAK4	A	G	ADD	749	1.148	0.8714	0.1828	0.8021	1.642	0.609	1.247	0.7531	0.4514	152.122
rs1544410	12	46526102	VDR	T	C	ADD	751	0.9102	1.099	0.1049	0.7411	1.118	0.8946	1.349	-0.8974	0.3695	124.522
rs2066807	12	55026949	STAT2	G	C	ADD	752	1.128	0.8869	0.1839	0.7863	1.617	0.6185	1.272	0.6528	0.5139	173.184
rs7316037	12	63133078	TBK1	A	G	ADD	739	1.353	0.7389	0.1953	0.923	1.984	0.5039	1.083	1.549	0.1213	40.8781
rs11175398	12	63137245	TBK1	G	A	ADD	747	0.7643	1.308	0.1069	0.6198	0.9424	1.061	1.613	-2.515	0.01192	4.01704
rs10878175	12	63153605	TBK1	C	G	ADD	748	1.027	0.9734	0.1202	0.8116	1.3	0.7691	1.232	0.2238	0.8229	277.317
rs7303577	12	63160369	TBK1	C	A	ADD	753	0.6543	1.528	0.1583	0.4797	0.8923	1.121	2.084	-2.679	0.007374	2.48504
rs2069727	12	66834490	IFNG	C	T	ADD	748	0.9681	1.033	0.1062	0.7862	1.192	0.8389	1.272	-0.3056	0.7599	256.086
rs2069718	12	66836429	IFNG	T	C	ADD	752	1.073	0.9322	0.1056	0.8722	1.319	0.758	1.147	0.6649	0.5061	170.556
rs2069716	12	66837082	IFNG	C	T	ADD	750	0.9044	1.106	0.2266	0.5801	1.41	0.7092	1.724	-0.4433	0.6575	221.577
rs1861494	12	66837676	IFNG	G	A	ADD	749	1.013	0.9867	0.112	0.8138	1.262	0.7923	1.229	0.1193	0.905	304.985
rs10744785	12	111829639	OAS1	G	C	ADD	748	0.974	1.027	0.1448	0.7333	1.294	0.7729	1.364	-0.1817	0.8559	288.438
rs34137742	12	111833044	OAS1	A	G	ADD	724	1.092	0.9154	0.1874	0.7566	1.577	0.6339	1.322	0.4718	0.6371	214.703
rs3741981	12	111833253	OAS1	G	A	ADD	751	1.051	0.9514	0.1737	0.7479	1.477	0.6769	1.337	0.287	0.7741	260.872
OAS1_004547	12	111833482	OAS1	A	G	ADD	744	0.7814	1.28	0.2194	0.5084	1.201	0.8325	1.967	-1.124	0.2609	87.9233
rs10774671	12	111841576	OAS1	G	A	ADD	751	1.288	0.7763	0.2536	0.7837	2.118	0.4722	1.276	0.9988	0.3179	107.132
rs1859330	12	111860771	OAS3	C	T	ADD	730	1.78	0.562	0.2651	1.058	2.992	0.3342	0.9448	2.174	0.02969	10.0055
rs7961861	12	111870301	OAS3	G	A	ADD	741	1.097	0.9112	0.2152	0.7198	1.673	0.5976	1.389	0.432	0.6657	224.341
rs2285933	12	111871162	OAS3	G	C	ADD	752	0.9289	1.077	0.2103	0.6152	1.403	0.7129	1.626	-0.3506	0.7259	244.628
rs2285932	12	111871333	OAS3	T	C	ADD	750	1.076	0.9297	0.2587	0.6478	1.786	0.5599	1.544	0.2818	0.7781	262.22
rs2072136	12	111883302	OAS3	T	C	ADD	753	1.009	0.9908	0.1411	0.7655	1.331	0.7515	1.306	0.0658	0.9475	319.308
OAS3_026920	12	111885590	OAS3	A	G	ADD	744	0.9629	1.039	0.2029	0.6469	1.433	0.6978	1.546	-0.1864	0.8522	287.191
OAS3_029396	12	111888066	OAS3	A	G	ADD	735	0.9845	1.016	0.1895	0.6791	1.427	0.7006	1.473	-0.08233	0.9344	314.893
rs2240188	12	111888067	OAS3	T	C	ADD	734	0.875	1.143	0.2203	0.5682	1.347	0.7422	1.76	-0.6064	0.5442	183.395
rs2010549	12	111893380	OAS3	G	C	ADD	748	1.082	0.9238	0.1466	0.8121	1.443	0.6931	1.231	0.5406	0.5888	198.426
rs2072133	12	111893643	OAS3	C	T	ADD	751	0.7824	1.278	0.1937	0.5352	1.144	0.8743	1.868	-1.266	0.2054	69.2198
rs7138261	12	111894353	OAS3	A	G	ADD	709	0.879	1.138	0.2341	0.5555	1.391	0.719	1.8	-0.551	0.5817	196.033
rs2072138	12	111909276	OAS2	C	G	ADD	750	0.7594	1.317	0.1986	0.5146	1.121	0.8923	1.943	-1.386	0.1657	55.8409
rs35992364	12	111917267	OAS2	G	A	ADD	753	1.019	0.9817	0.1906	0.7011	1.48	0.6757	1.426	0.09691	0.9228	310.984
rs1293755	12	111919833	OAS2	T	A	ADD	750	0.8217	1.217	0.2468	0.5066	1.333	0.7502	1.974	-0.7955	0.4263	143.663
rs2072137	12	111925304	OAS2	C	T	ADD	751	0.9156	1.092	0.1548	0.676	1.24	0.8064	1.479	-0.5697	0.5688	191.686
rs929291	12	111928801	OAS2	T	C	ADD	746	1.051	0.9518	0.2161	0.6878	1.605	0.6232	1.454	0.2284	0.8193	276.104
rs916973	12	111931486	OAS2	C	T	ADD	748	1.18	0.8475	0.2037	0.7915	1.759	0.5685	1.263	0.8122	0.4166	140.394
rs15895	12	111932671	OAS2	T	C	ADD	753	0.982	1.018	0.1854	0.6828	1.412	0.708	1.465	-0.09806	0.9219	310.68
rs13311	12	111933035	OAS2	A	C	ADD	751	0.8735	1.145	0.1557	0.6438	1.185	0.8437	1.553	-0.8685	0.3851	129.779
rs1296371	12	111934088	OAS2	C	T	ADD	730	0.9881	1.012	0.138	0.754	1.295	0.7723	1.326	-0.08709	0.9306	313.612
rs12819210	12	119942783	OASL	A	G	ADD	753	1.303	0.7676	0.1358	0.9984	1.7	0.5882	1.002	1.948	0.0514	17.3218
rs3213546	12	119955599	OASL	C	G	ADD	752	1.053	0.9495	0.3375	0.5435	2.041	0.49	1.84	0.1535	0.878	295.886
rs3213545	12	119955720	OASL	T	C	ADD	749	0.7958	1.257	0.122	0.6266	1.011	0.9894	1.596	-1.873	0.06109	20.5873
rs10774580	12	119960806	OASL	A	G	ADD	751	0.839	1.192	0.1127	0.6728	1.046	0.9557	1.486	-1.558	0.1193	40.2041
rs28360475	12	119961429	OASL	G	A	ADD	750	1.352	0.7398	0.1285	1.051	1.739	0.5751	0.9517	2.346	0.01899	6.39963
rs2236350	14	23700850	ISGF3G	T	G	ADD	748	1.112	0.8994	0.1723	0.7932	1.558	0.6417	1.261	0.6155	0.5383	181.407
rs12436555	14	23704665	ISGF3G	A	G	ADD	748	1.06	0.9438	0.1389	0.8071	1.391	0.719	1.239	0.4163	0.6772	228.216
rs2236338	14	24170122	GZMB	G	A	ADD	750	1.163	0.8598	0.1284	0.9043	1.496	0.6685	1.106	1.177	0.2393	80.6441
rs11539752	14	24171429	GZMB	C	G	ADD	749	0.997	1.003	0.1302	0.7724	1.287	0.777	1.295	-0.02279	0.9818	330.867
rs2273844	14	24173254	GZMB	A	G	ADD	752	1.011	0.9887	0.1283	0.7866	1.301	0.7688	1.271	0.08891	0.9292	313.14
rs28489163	14	93645984	IFI27	A	G	ADD	751	1.599	0.6254	0.1683	1.15	2.224	0.4497	0.8698	2.789	0.005287	1.78172
IFI27_000630	14	93646335	IFI27	G	C	ADD	752	1.008	0.9918	0.1246	0.7897	1.287	0.7769	1.266	0.06594	0.9474	319.274
rs3814821	14	93646690	IFI27	T	C	ADD	753	0.8285	1.207	0.1038	0.6759	1.015	0.9848	1.479	-1.813	0.06986	23.5428
rs2799	14	93652679	IFI27	C	G	ADD	741	1.041	0.9606	0.2133	0.6853	1.581	0.6323	1.459	0.1885	0.8505	286.618
IFI27_007273	14	93652978	IFI27	0	C	ADD	752	NA	NA	NA	NA	NA	NA	NA	NA	NA	NA
rs1243081	14	93653215	IFI27	A	G	ADD	712	1.477	0.6772	0.1735	1.051	2.075	0.482	0.9515	2.246	0.02469	8.32053
rs7141881	14	93653617	IFI27	A	G	ADD	750	1.262	0.7925	0.115	1.007	1.581	0.6326	0.9929	2.022	0.0432	14.5584
rs1243082	14	93653748	IFI27	A	C	ADD	751	1.291	0.7744	0.2169	0.8441	1.976	0.5062	1.185	1.179	0.2386	80.4082
rs10132928	14	93654162	IFI27	G	A	ADD	751	1.278	0.7827	0.1092	1.032	1.582	0.632	0.9694	2.244	0.02481	8.36097
rs4780355	16	11255359	SOCS1	G	A	ADD	736	1.12	0.8928	0.1146	0.8947	1.402	0.7132	1.118	0.9889	0.3227	108.75
rs243330	16	11258492	SOCS1	T	C	ADD	735	0.9813	1.019	0.1047	0.7992	1.205	0.8301	1.251	-0.1808	0.8565	288.641
rs3760396	17	29605554	CCL2	G	C	ADD	753	0.8197	1.22	0.1267	0.6394	1.051	0.9516	1.564	-1.569	0.1167	39.3279
rs2857656	17	29606120	CCL2	G	C	ADD	748	1.185	0.8439	0.12	0.9366	1.499	0.667	1.068	1.414	0.1573	53.0101
rs4586	17	29607382	CCL2	G	A	ADD	751	1.302	0.7678	0.1143	1.041	1.629	0.6137	0.9605	2.313	0.02074	6.98938
rs4969168	17	73865388	SOCS3	A	G	ADD	747	0.812	1.232	0.1362	0.6217	1.06	0.943	1.608	-1.529	0.1262	42.5294
rs2292151	19	4767719	TICAM1	T	C	ADD	748	1.077	0.9281	0.1237	0.8455	1.373	0.7284	1.183	0.603	0.5465	184.171
rs7255265	19	4769378	TICAM1	A	G	ADD	751	1.036	0.9657	0.1091	0.8362	1.282	0.7798	1.196	0.3201	0.7489	252.379
rs12609318	19	6614916	TNFSF14	A	G	ADD	747	1.09	0.9173	0.1221	0.8582	1.385	0.7221	1.165	0.707	0.4796	161.625
rs1077667	19	6619972	TNFSF14	T	C	ADD	752	0.9175	1.09	0.1344	0.7051	1.194	0.8375	1.418	-0.6405	0.5218	175.847
rs8106574	19	6622142	TNFSF14	A	G	ADD	744	0.9814	1.019	0.1262	0.7664	1.257	0.7956	1.305	-0.1484	0.882	297.234
rs8112310	19	7710320	CD209	A	T	ADD	752	1.331	0.7514	0.154	0.9841	1.8	0.5556	1.016	1.856	0.06349	21.3961
rs4804801	19	7713482	CD209	T	A	ADD	716	1.515	0.6601	0.2071	1.01	2.273	0.4399	0.9905	2.006	0.04486	15.1178
rs4804802	19	7713610	CD209	A	G	ADD	752	0.8061	1.241	0.1862	0.5597	1.161	0.8613	1.787	-1.158	0.247	83.239
rs8105572	19	7715327	CD209	A	G	ADD	747	1.057	0.9464	0.1724	0.7536	1.481	0.6751	1.327	0.3193	0.7495	252.582
rs11465384	19	7716006	CD209	T	C	ADD	750	0.9164	1.091	0.2037	0.6147	1.366	0.7321	1.627	-0.4289	0.668	225.116
rs2287886	19	7718536	CD209	A	G	ADD	749	0.8993	1.112	0.1117	0.7225	1.119	0.8933	1.384	-0.95	0.3421	115.288
rs735240	19	7719336	CD209	A	G	ADD	750	0.9388	1.065	0.1068	0.7614	1.157	0.864	1.313	-0.5914	0.5542	186.765
rs7252764	19	7733137	CLEC4M	A	G	ADD	749	1.26	0.7939	0.2623	0.7533	2.106	0.4748	1.327	0.88	0.3789	127.689
rs2287887	19	7733955	CLEC4M	C	A	ADD	749	0.9275	1.078	0.1202	0.7328	1.174	0.8518	1.365	-0.6259	0.5314	179.082
rs868876	19	7737226	CLEC4M	A	T	ADD	750	0.9525	1.05	0.1205	0.7522	1.206	0.829	1.33	-0.4035	0.6866	231.384
rs475896	19	7737429	CLEC4M	C	G	ADD	752	0.9899	1.01	0.1121	0.7947	1.233	0.811	1.258	-0.09029	0.9281	312.77
rs558705	19	7738183	CLEC4M	T	C	ADD	747	0.6762	1.479	0.1744	0.4804	0.9518	1.051	2.081	-2.243	0.02489	8.38793
rs557094	19	7738286	CLEC4M	G	C	ADD	749	1.093	0.9149	0.1676	0.7869	1.518	0.6587	1.271	0.5305	0.5957	200.751
rs2161525	19	7738664	CLEC4M	G	A	ADD	747	1.169	0.8552	0.1119	0.9391	1.456	0.6869	1.065	1.398	0.1621	54.6277
rs8113469	19	7738959	CLEC4M	G	A	ADD	745	0.8211	1.218	0.1243	0.6435	1.048	0.9545	1.554	-1.585	0.1129	38.0473
rs12610506	19	7739071	CLEC4M	A	G	ADD	751	0.9375	1.067	0.1145	0.749	1.173	0.8522	1.335	-0.5636	0.5731	193.135
rs3745376	19	7739690	CLEC4M	A	C	ADD	750	1.316	0.76	0.1413	0.9976	1.736	0.5762	1.002	1.943	0.05205	17.5408
rs15282	19	7740274	CLEC4M	T	C	ADD	752	1.306	0.7658	0.1156	1.041	1.638	0.6105	0.9607	2.307	0.02106	7.09722
rs2304207	19	54859538	IRF3	C	G	ADD	750	0.6031	1.658	0.1402	0.4582	0.7937	1.26	2.182	-3.609	0.0003078	0.103729
rs2304204	19	54860832	IRF3	C	T	ADD	751	0.7739	1.292	0.1155	0.6172	0.9705	1.03	1.62	-2.219	0.02649	8.92713
rs752118	20	44180145	CD40	A	G	ADD	749	1.019	0.9813	0.1289	0.7915	1.312	0.7622	1.263	0.1464	0.8836	297.773
rs745307	20	44180493	CD40	T	C	ADD	745	1.049	0.9531	0.1258	0.8199	1.343	0.7448	1.22	0.3816	0.7027	236.81
rs3765457	20	44190620	CD40	G	A	ADD	751	1.151	0.8691	0.1478	0.8612	1.537	0.6505	1.161	0.9491	0.3426	115.456
rs3765459	20	44190814	CD40	A	G	ADD	747	1.005	0.9955	0.1316	0.7762	1.3	0.7692	1.288	0.03459	0.9724	327.699
rs11569345	20	44191928	CD40	A	G	ADD	752	1.124	0.8894	0.3017	0.6224	2.031	0.4923	1.607	0.3886	0.6976	235.091
rs11569348	20	44192680	CD40	A	C	ADD	748	1.112	0.8996	0.1553	0.8198	1.507	0.6635	1.22	0.681	0.4959	167.118
rs2226299	21	33620794	IFNAR1	A	G	ADD	745	0.8867	1.128	0.1372	0.6776	1.16	0.8618	1.476	-0.8762	0.3809	128.363
rs2252930	21	33626071	IFNAR1	C	G	ADD	752	1.273	0.7854	0.1169	1.013	1.601	0.6246	0.9876	2.067	0.03874	13.0554
rs2252931	21	33626190	IFNAR1	A	G	ADD	752	1.272	0.7859	0.1165	1.013	1.599	0.6254	0.9876	2.067	0.03874	13.0554
rs17643419	21	33633668	IFNAR1	A	G	ADD	752	0.9125	1.096	0.2011	0.6152	1.353	0.7389	1.626	-0.4555	0.6487	218.612
rs2253923	21	33634289	IFNAR1	A	T	ADD	753	0.8364	1.196	0.1076	0.6774	1.033	0.9683	1.476	-1.661	0.09677	32.6115
rs2257167	21	33637569	IFNAR1	G	C	ADD	750	0.8713	1.148	0.158	0.6392	1.188	0.842	1.564	-0.8719	0.3833	129.172
rs12483293	21	33638659	IFNAR1	C	A	ADD	751	0.9285	1.077	0.1135	0.7432	1.16	0.8622	1.346	-0.6538	0.5132	172.948
rs2243600	21	33645531	IFNAR1	A	C	ADD	752	0.9489	1.054	0.1202	0.7498	1.201	0.8327	1.334	-0.4366	0.6624	223.229
rs2834202	21	33652824	IFNAR1	G	A	ADD	748	0.8665	1.154	0.1233	0.6805	1.103	0.9064	1.469	-1.163	0.245	82.565
rs9808753	21	33709182	IFNGR2	G	A	ADD	751	1.011	0.9895	0.158	0.7414	1.378	0.7259	1.349	0.06677	0.9468	319.072
rs11910627	21	33721220	IFNGR2	G	C	ADD	751	1.031	0.9697	0.1165	0.8208	1.296	0.7718	1.218	0.2643	0.7915	266.736
rs1059293	21	33731563	IFNGR2	A	G	ADD	753	1.021	0.979	0.1038	0.8334	1.252	0.7988	1.2	0.2043	0.8381	282.44
rs2071430	21	41719935	MX1	0	C	ADD	741	NA	NA	NA	NA	NA	NA	NA	NA	NA	NA
rs7280422	21	41723437	MX1	C	G	ADD	747	0.5871	1.703	0.1406	0.4457	0.7733	1.293	2.244	-3.789	0.0001511	0.0509207
rs455599	21	41726549	MX1	G	A	ADD	752	1.821	0.5491	0.2071	1.214	2.733	0.366	0.8241	2.895	0.003797	1.27959
rs457347	21	41726740	MX1	G	A	ADD	749	1.787	0.5595	0.2077	1.19	2.685	0.3724	0.8406	2.796	0.005178	1.74499
rs468672	21	41728034	MX1	A	T	ADD	737	1.289	0.7756	0.1985	0.8739	1.902	0.5256	1.144	1.281	0.2003	67.5011
rs2838036	21	41729610	MX1	A	T	ADD	751	0.6165	1.622	0.3422	0.3152	1.206	0.8294	3.172	-1.413	0.1576	53.1112
rs8132871	21	41732690	MX1	A	G	ADD	748	0.6462	1.547	0.1539	0.4779	0.8738	1.144	2.092	-2.837	0.004559	1.53638
rs467558	21	41733265	MX1	G	A	ADD	746	1.583	0.6316	0.1952	1.08	2.321	0.4308	0.9258	2.355	0.01853	6.24461
rs467960	21	41734761	MX1	G	A	ADD	753	0.9877	1.012	0.215	0.648	1.505	0.6643	1.543	-0.05761	0.9541	321.532
rs469390	21	41739800	MX1	G	A	ADD	753	1.215	0.8229	0.2068	0.8102	1.823	0.5487	1.234	0.9421	0.3461	116.636
rs7277299	21	41740660	MX1	A	C	ADD	752	1.08	0.9259	0.2026	0.726	1.607	0.6225	1.377	0.3798	0.7041	237.282
rs467639	21	41741434	MX1	A	T	ADD	749	1.158	0.8632	0.1854	0.8054	1.666	0.6002	1.242	0.7931	0.4277	144.135
rs2070229	21	41742983	MX1	G	A	ADD	751	1.067	0.9369	0.1928	0.7314	1.558	0.642	1.367	0.338	0.7354	247.83
rs469218	21	41743564	MX1	A	G	ADD	698	0.9393	1.065	0.2721	0.551	1.601	0.6245	1.815	-0.2302	0.8179	275.632
rs3737399	21	41745242	MX1	A	G	ADD	747	1.037	0.9645	0.1971	0.7046	1.526	0.6554	1.419	0.1836	0.8543	287.899
rs1050008	21	41746531	MX1	G	A	ADD	752	0.9092	1.1	0.1692	0.6526	1.267	0.7895	1.532	-0.5627	0.5737	193.337
rs467593	21	41748421	MX1	G	A	ADD	748	1.08	0.9257	0.1954	0.7366	1.584	0.6312	1.358	0.3951	0.6928	233.474
rs468811	21	41751716	MX1	A	G	ADD	752	0.8299	1.205	0.1619	0.6043	1.14	0.8775	1.655	-1.152	0.2492	83.9804
rs13433394	21	41753780	MX1	A	G	ADD	751	1.232	0.812	0.1496	0.9186	1.651	0.6056	1.089	1.393	0.1638	55.2006
rs4819387	21	44471630	B7H2	A	G	ADD	753	0.9675	1.034	0.1092	0.7811	1.198	0.8345	1.28	-0.303	0.7619	256.76
rs4819388	21	44471849	B7H2	A	G	ADD	749	0.9789	1.022	0.1198	0.774	1.238	0.8077	1.292	-0.178	0.8587	289.382
rs11558819	21	44481202	B7H2	T	C	ADD	750	0.7936	1.26	0.1207	0.6263	1.005	0.9946	1.597	-1.915	0.05551	18.7069
rs378299	21	44485771	B7H2	C	T	ADD	740	0.93	1.075	0.1098	0.75	1.153	0.8672	1.333	-0.6614	0.5083	171.297
Legend
SNP	Single Nucleotide Polymorphisms
CHR	Chromosome
Position	Genomic Position
Gene	HUGO gene name
Minor Allele	Minor allele according to the frequency reported for this dataset
Major Allele	Major allele according to the frequency reported for this dataset
TEST	Association test performed
n	Number of individuals included in the analysis
OR Minor Allele	Odds ratio using the minor allele
OR Major Allele	Odds ratio using the major allele
SE	Standard Error
L95 Minor Allele	Lower 95% Confidence Interval for the odds ratio calculated for the minor allele
U95 Minor Allele	Upper 95% Confidence Interval for the odds ratio calculated for the minor allele
L95 Major Allele	Lower 95% Confidence Interval for the odds ratio calculated for the major allele
U95 Major Allele	Upper 95% Confidence Interval for the odds ratio calculated for the major allele
STAT	Coefficient t-statistic
P-value	Asymptotic p-value for t-statistic
Bonferroni p-value	Bonferroni corrected p-value
