# Supplementary material for: Host Genetic Risk Factors for West Nile Virus Infection and Disease Progression
Source: PLoS One. 2011 Sep 15;6(9):e24745. doi: 10.1371/journal.pone.0024745 (PMC3174177; doi:10.1371/journal.pone.0024745)
Supplement: Table S7 — Symptomatic vs. asymptomatic logistic regression analysis results for dominant model of inheritance. (XLS) [file pone.0024745.s007.xls]

## Sheet: Sheet1
Table S7. Symptomatic vs. asymptomatic logistic regression analysis results for dominant model of inheritance. Odds Ratios were calculated using logistic regression. The first five PC's were included as covariates to control for population stratification.
SNP	CHR	Position	Gene	Minor Allele	Major Allele	TEST	n	OR Minor Allele	OR Major Allele	SE	L95 Minor Allele	U95 Minor Allele	L95 Major Allele	U95 Major Allele	STAT	P-value	Bonferroni P-Value
rs2254002	1	65074257	JAK1	T	G	DOM	751	0.7778	1.286	0.2199	0.5055	1.197	0.8355	1.978	-1.143	0.2532	85.3284								1.4276	#VALUE!	no
rs4916004	1	65076098	JAK1	A	G	DOM	750	1.399	0.7148	0.2123	0.9228	2.121	0.4715	1.084	1.581	0.1138	38.3506								1.0852	#VALUE!	no
rs310244	1	65078465	JAK1	T	C	DOM	750	0.7304	1.369	0.1972	0.4963	1.075	0.9302	2.015	-1.593	0.1112	37.4744								1.0654	#VALUE!	no
rs310247	1	65079997	JAK1	T	C	DOM	750	0.6126	1.632	0.2373	0.3847	0.9754	1.025	2.599	-2.065	0.03894	13.1228								1.3996	#VALUE!	no
rs2230587	1	65083850	JAK1	T	C	DOM	752	1.112	0.8991	0.1861	0.7723	1.602	0.6244	1.295	0.5715	0.5677	191.315								1.0868	#VALUE!	no
rs10789166	1	65085401	JAK1	G	A	DOM	752	0.6615	1.512	0.2319	0.42	1.042	0.9596	2.381	-1.782	0.07474	25.1874								1.25	#VALUE!	no
rs310219	1	65087886	JAK1	T	C	DOM	749	0.6902	1.449	0.2139	0.4539	1.05	0.9528	2.203	-1.734	0.08297	27.9609								1.6997	#VALUE!	no
rs188698	1	65091172	JAK1	C	T	DOM	752	0.6601	1.515	0.2047	0.442	0.9859	1.014	2.262	-2.03	0.0424	14.2888								0.9702	#VALUE!	no
rs2256298	1	65103270	JAK1	T	C	DOM	745	0.8165	1.225	0.1746	0.5798	1.15	0.8698	1.725	-1.161	0.2456	82.7672								1.1555	#VALUE!	no
rs11585932	1	65107683	JAK1	G	A	DOM	745	1.019	0.9818	0.2194	0.6625	1.566	0.6386	1.509	0.0837	0.9333	314.522								1.0736	#VALUE!	no
rs12135754	1	65115093	JAK1	C	A	DOM	752	1.309	0.7639	0.215	0.8589	1.995	0.5012	1.164	1.253	0.2104	70.9048								1.2012	#VALUE!	no
rs310201	1	65122196	JAK1	C	T	DOM	752	0.9866	1.014	0.1988	0.6682	1.457	0.6865	1.496	-0.06779	0.946	318.802								1.6629	#VALUE!	no
rs310199	1	65122710	JAK1	C	T	DOM	752	0.9431	1.06	0.1892	0.6509	1.366	0.7319	1.536	-0.3099	0.7567	255.008								1.7197	#VALUE!	no
rs310198	1	65123656	JAK1	A	G	DOM	750	0.6946	1.44	0.2457	0.4292	1.124	0.8894	2.33	-1.483	0.1381	46.5397								0.9789	#VALUE!	no
rs10802189	1	116858253	CD58	A	G	DOM	748	1.094	0.9139	0.1515	0.8131	1.472	0.6791	1.23	0.5939	0.5525	186.192								1.0999	#VALUE!	no
rs17036001	1	116916652	CD58	A	G	DOM	745	0.9602	1.041	0.2346	0.6063	1.521	0.6575	1.649	-0.173	0.8626	290.696								1.5662	#VALUE!	no
rs1335531	1	116916900	CD58	G	C	DOM	746	0.7836	1.276	0.1516	0.5822	1.055	0.9482	1.718	-1.609	0.1077	36.2949								1.5059	#VALUE!	no
rs6701046	1	117099257	CD2	G	A	DOM	748	1.07	0.9345	0.1523	0.7939	1.442	0.6933	1.26	0.4447	0.6566	221.274								0.9091	#VALUE!	no
rs3136705	1	117104923	CD2	A	G	DOM	752	0.9287	1.077	0.1783	0.6548	1.317	0.7592	1.527	-0.4151	0.6781	228.52								1.8693	#VALUE!	no
rs798043	1	117105020	CD2	T	C	DOM	752	1.133	0.8822	0.1508	0.8435	1.523	0.6565	1.186	0.8309	0.406	136.822								1.7439	#VALUE!	no
rs1801274	1	159746369	FCGR2A	T	C	DOM	752	1.345	0.7437	0.1654	0.9723	1.86	0.5378	1.029	1.79	0.07346	24.756								1.3461	#VALUE!	no
rs627839	1	180808704	RNASEL	A	C	DOM	750	1.003	0.9968	0.1699	0.719	1.4	0.7145	1.391	0.01858	0.9852	332.012								1.1486	#VALUE!	no
rs11072	1	180809954	RNASEL	C	T	DOM	748	0.9106	1.098	0.152	0.676	1.227	0.8152	1.479	-0.616	0.5379	181.272								1.033	#VALUE!	no
rs672527	1	180811844	RNASEL	A	G	DOM	751	0.9843	1.016	0.1516	0.7312	1.325	0.7547	1.368	-0.1044	0.9168	308.962								1.2553	#VALUE!	no
rs533259	1	180815642	RNASEL	T	C	DOM	749	1.599	0.6253	0.259	0.9626	2.657	0.3764	1.039	1.813	0.06988	23.5496								1.1667	#VALUE!	no
rs627928	1	180817960	RNASEL	T	G	DOM	753	0.8465	1.181	0.1651	0.6125	1.17	0.8549	1.633	-1.01	0.3125	105.312								1.2492	#VALUE!	no
rs486907	1	180821180	RNASEL	T	C	DOM	753	1.008	0.992	0.1566	0.7416	1.37	0.7298	1.348	0.05134	0.9591	323.217								1.2128	#VALUE!	no
rs3024498	1	205008152	IL10	C	T	DOM	747	1.06	0.9433	0.1566	0.7798	1.441	0.694	1.282	0.3724	0.7096	239.135								1.2756	#VALUE!	no
rs3024496	1	205008487	IL10	C	T	DOM	749	1.111	0.9001	0.1735	0.7907	1.561	0.6406	1.265	0.6063	0.5443	183.429								1.6857	#VALUE!	no
rs3024509	1	205009920	IL10	C	T	DOM	750	0.6794	1.472	0.2277	0.4348	1.061	0.9421	2.3	-1.698	0.0895	30.1615								0.8843	#VALUE!	no
rs3021094	1	205011575	IL10	G	T	DOM	753	1.303	0.7676	0.2026	0.8758	1.938	0.5161	1.142	1.306	0.1917	64.6029								1.1079	#VALUE!	no
rs1800871	1	205013257	IL10	T	C	DOM	749	1.053	0.9494	0.1585	0.772	1.437	0.6959	1.295	0.3277	0.7431	250.425								0.9271	#VALUE!	no
rs1800896	1	205013520	IL10	C	T	DOM	751	1.019	0.9815	0.174	0.7245	1.433	0.6979	1.38	0.1074	0.9145	308.186								1.1676	#VALUE!	no
rs3770768	2	37199655	EIF2AK2	T	C	DOM	751	1.013	0.9868	0.1846	0.7058	1.455	0.6872	1.417	0.07212	0.9425	317.623								1.4582	#VALUE!	no
rs4648212	2	37206515	EIF2AK2	T	C	DOM	749	1.165	0.8583	0.2418	0.7253	1.871	0.5343	1.379	0.6318	0.5275	177.767								1.3813	#VALUE!	no
rs4670185	2	37209038	EIF2AK2	G	A	DOM	752	1.109	0.9019	0.2386	0.6945	1.77	0.565	1.44	0.4325	0.6654	224.24								1.3115	#VALUE!	no
rs4648186	2	37220611	EIF2AK2	T	C	DOM	750	0.9525	1.05	0.1714	0.6807	1.333	0.7503	1.469	-0.2842	0.7762	261.579								1.025	#VALUE!	no
rs4648184	2	37220999	EIF2AK2	A	T	DOM	753	1.423	0.7026	0.3248	0.753	2.691	0.3717	1.328	1.087	0.2771	93.3827								1.027	#VALUE!	no
rs2373114	2	37226754	EIF2AK2	A	G	DOM	748	1.554	0.6434	0.2185	1.013	2.385	0.4193	0.9873	2.018	0.04356	14.6797								1.2354	#VALUE!	no
rs2254958	2	37229795	EIF2AK2	T	C	DOM	747	0.9545	1.048	0.1572	0.7014	1.299	0.7699	1.426	-0.2966	0.7668	258.412								1.1001	#VALUE!	no
rs12712526	2	37236819	EIF2AK2	G	A	DOM	742	1.176	0.8502	0.1659	0.8497	1.628	0.6142	1.177	0.9781	0.328	110.536								1.1745	#VALUE!	no
rs7340267	2	37237964	EIF2AK2	G	A	DOM	740	1.202	0.832	0.1666	0.8671	1.666	0.6002	1.153	1.104	0.2696	90.8552								1.217	#VALUE!	no
rs1990760	2	162832297	IFIH1	G	A	DOM	751	0.7614	1.313	0.1605	0.5559	1.043	0.9589	1.799	-1.699	0.0894	30.1278								1.2115	#VALUE!	no
rs3747517	2	162837070	IFIH1	T	C	DOM	751	0.8117	1.232	0.1493	0.6057	1.088	0.9195	1.651	-1.398	0.1622	54.6614								1.2214	#VALUE!	no
rs13023380	2	162862609	IFIH1	A	G	DOM	748	1.26	0.7934	0.1684	0.9062	1.753	0.5704	1.104	1.375	0.1692	57.0204								1.0274	#VALUE!	no
rs17715343	2	162875992	IFIH1	G	C	DOM	752	0.7236	1.382	0.2092	0.4802	1.09	0.9172	2.082	-1.547	0.122	41.114								1.2741	#VALUE!	no
rs2059691	2	179010130	PRKRA	A	G	DOM	751	0.7259	1.378	0.151	0.54	0.9758	1.025	1.852	-2.122	0.03384	11.4041								1.1714	#VALUE!	no
rs2288320	2	179016748	PRKRA	C	A	DOM	749	1.009	0.9909	0.1598	0.7378	1.38	0.7244	1.355	0.05743	0.9542	321.565								0.9618	#VALUE!	no
rs3752689	2	179020859	PRKRA	G	A	DOM	747	1.148	0.8711	0.1559	0.8456	1.558	0.6417	1.183	0.8849	0.3762	126.779								1.5912	#VALUE!	no
rs3771300	2	191543841	STAT1	G	T	DOM	751	0.7774	1.286	0.1722	0.5547	1.09	0.9179	1.803	-1.462	0.1437	48.4269								1.1002	#VALUE!	no
rs2066804	2	191550004	STAT1	T	C	DOM	751	1.054	0.9486	0.1523	0.7821	1.421	0.7038	1.279	0.3462	0.7292	245.74								1.1805	#VALUE!	no
rs12693591	2	191568747	STAT1	A	C	DOM	753	1.006	0.9938	0.1694	0.722	1.402	0.7131	1.385	0.03652	0.9709	327.193								1.4735	#VALUE!	no
rs10173099	2	191575577	STAT1	A	G	DOM	753	0.7586	1.318	0.1509	0.5643	1.02	0.9807	1.772	-1.831	0.06712	22.6194								1.1507	#VALUE!	no
rs1879877	2	204278245	CD28	T	G	DOM	750	0.8916	1.122	0.1521	0.6618	1.201	0.8325	1.511	-0.7544	0.4506	151.852								1.529	#VALUE!	no
rs3181096	2	204278337	CD28	A	G	DOM	721	0.9787	1.022	0.1525	0.7258	1.32	0.7578	1.378	-0.1414	0.8876	299.121								1.1378	#VALUE!	no
rs3116494	2	204300266	CD28	G	A	DOM	752	1.014	0.9862	0.1518	0.753	1.365	0.7324	1.328	0.09166	0.927	312.399								1.4702	#VALUE!	no
rs16840252	2	204439764	CTLA4	A	G	DOM	751	1.165	0.858	0.167	0.8401	1.617	0.6185	1.19	0.9166	0.3593	121.084								1.0161	#VALUE!	no
rs11571317	2	204440253	CTLA4	A	G	DOM	753	0.9816	1.019	0.198	0.6659	1.447	0.6911	1.502	-0.09368	0.9254	311.86								1.2054	#VALUE!	no
rs5742909	2	204440592	CTLA4	A	G	DOM	749	0.901	1.11	0.2015	0.607	1.338	0.7476	1.647	-0.517	0.6052	203.952								1.1009	#VALUE!	no
rs41265961	2	204444106	CTLA4	A	G	DOM	752	0.8338	1.199	0.2712	0.49	1.419	0.7049	2.041	-0.6703	0.5027	169.41								1.1405	#VALUE!	no
rs11883722	2	204509090	ICOS	A	G	DOM	741	0.9269	1.079	0.1564	0.6822	1.259	0.7941	1.466	-0.4855	0.6274	211.434								1.138	#VALUE!	no
rs4264550	2	204529739	ICOS	A	G	DOM	751	0.991	1.009	0.1715	0.7081	1.387	0.7211	1.412	-0.05287	0.9578	322.779								1.177	#VALUE!	no
rs10183087	2	204532569	ICOS	C	A	DOM	752	1.014	0.9864	0.1514	0.7535	1.364	0.7332	1.327	0.09017	0.9282	312.803								0.9986	#VALUE!	no
rs10932035	2	204532897	ICOS	A	G	DOM	753	0.9799	1.021	0.1844	0.6827	1.406	0.711	1.465	-0.1103	0.9122	307.411								1.1632	#VALUE!	no
rs6705653	2	242442232	PDCD1	T	C	DOM	743	0.9515	1.051	0.1605	0.6948	1.303	0.7673	1.439	-0.3096	0.7569	255.075								1.2052	#VALUE!	no
PDCD1_008885	2	242442870	PCDC1	C	G	DOM	743	1.205	0.8296	0.2706	0.7093	2.048	0.4882	1.41	0.6904	0.4899	165.096								0.8619	#VALUE!	no
rs7419333	2	242443985	PDCD1	G	C	DOM	742	0.9784	1.022	0.155	0.7221	1.326	0.7544	1.385	-0.1412	0.8877	299.155								1.4689	#VALUE!	no
rs4988457	3	38157140	MYD88	G	C	DOM	749	1.513	0.6609	0.2618	0.9059	2.528	0.3956	1.104	1.582	0.1136	38.2832								1.3384	#VALUE!	no
rs7744	3	38159025	MYD88	G	A	DOM	753	0.8925	1.121	0.1626	0.6489	1.227	0.8147	1.541	-0.6996	0.4841	163.142								0.9357	#VALUE!	no
rs6853	3	38159374	MYD88	G	A	DOM	753	1.393	0.7178	0.1789	0.9812	1.978	0.5055	1.019	1.854	0.06379	21.4972								1.0381	#VALUE!	no
rs1799988	3	46387263	CCR5	A	G	DOM	745	0.804	1.244	0.1637	0.5833	1.108	0.9025	1.714	-1.333	0.1825	61.5025								1.2474	#VALUE!	no
rs352140	3	52231737	TLR9	G	A	DOM	750	0.9963	1.004	0.1684	0.7163	1.386	0.7215	1.396	-0.02173	0.9827	331.17								1.4077	#VALUE!	no
rs187084	3	52236071	TLR9	C	T	DOM	750	1.016	0.9842	0.1559	0.7486	1.379	0.7251	1.336	0.1022	0.9186	309.568								0.8967	#VALUE!	no
rs17281703	3	120726239	CD80	A	G	DOM	750	0.8222	1.216	0.1868	0.5701	1.186	0.8434	1.754	-1.048	0.2945	99.2465								0.9552	#VALUE!	no
rs1599796	3	120726624	CD80	A	G	DOM	750	1.003	0.9974	0.1555	0.7391	1.36	0.7353	1.353	0.01646	0.9869	332.585								1.0429	#VALUE!	no
rs7628626	3	120727111	CD80	A	C	DOM	753	1.286	0.7778	0.1579	0.9434	1.752	0.5708	1.06	1.591	0.1116	37.6092								1.2052	#VALUE!	no
rs2629396	3	120731657	CD80	G	T	DOM	752	1.128	0.8864	0.1565	0.83	1.533	0.6522	1.205	0.77	0.4413	148.718								0.9199	#VALUE!	no
rs2228017	3	120746370	CD80	A	G	DOM	752	0.8746	1.143	0.1487	0.6534	1.17	0.8543	1.53	-0.9014	0.3674	123.814								1.2149	#VALUE!	no
rs9282638	3	120746460	CD80	C	T	DOM	752	1.161	0.8611	0.1686	0.8345	1.616	0.6188	1.198	0.887	0.3751	126.409								1.4028	#VALUE!	no
rs16829980	3	120761158	CD80	G	A	DOM	746	1.175	0.8513	0.1812	0.8235	1.676	0.5968	1.214	0.8884	0.3743	126.139								1.1401	#VALUE!	no
rs16829984	3	120761230	CD80	C	G	DOM	750	0.939	1.065	0.1824	0.6567	1.343	0.7448	1.523	-0.345	0.7301	246.044								1.1529	#VALUE!	no
rs1880661	3	120761538	CD80	T	C	DOM	752	1.259	0.7941	0.1611	0.9184	1.727	0.5791	1.089	1.431	0.1523	51.3251								1.0325	#VALUE!	no
CD80_035889	3	120795177	CD80	A	G	DOM	750	0.9545	1.048	0.1572	0.7014	1.299	0.7699	1.426	-0.2963	0.767	258.479								0.9227	#VALUE!	no
rs2681417	3	123307887	CD86	G	A	DOM	753	1.068	0.9365	0.2165	0.6986	1.632	0.6127	1.431	0.303	0.7619	256.76								1.2836	#VALUE!	no
rs1129055	3	123321009	CD86	A	G	DOM	751	1.003	0.997	0.1492	0.7487	1.344	0.7442	1.336	0.02018	0.9839	331.574								1.0297	#VALUE!	no
rs17281995	3	123322331	CD86	G	C	DOM	753	1.324	0.7552	0.1647	0.9588	1.829	0.5469	1.043	1.704	0.0883	29.7571								1.2917	#VALUE!	no
rs2305619	3	158637555	PTX3	A	G	DOM	747	0.952	1.05	0.1649	0.689	1.315	0.7603	1.451	-0.2982	0.7655	257.974								1.1462	#VALUE!	no
rs3845978	3	158642388	PTX3	A	G	DOM	751	0.9305	1.075	0.2634	0.5552	1.559	0.6413	1.801	-0.2734	0.7846	264.41								1.1724	#VALUE!	no
rs3911403	3	158644821	PTX3	T	A	DOM	749	1.243	0.8044	0.2337	0.7863	1.965	0.5088	1.272	0.9312	0.3517	118.523								1.153	#VALUE!	no
rs3921	4	77161967	CXCL10	C	G	DOM	749	0.7968	1.255	0.1755	0.5649	1.124	0.8897	1.77	-1.294	0.1956	65.9172								1.0863	#VALUE!	no
rs4256246	4	77164546	CXCL10	A	G	DOM	750	1.073	0.9321	0.1622	0.7807	1.474	0.6782	1.281	0.4336	0.6646	223.97								1.2486	#VALUE!	no
rs230525	4	103677907	NFKB1	G	A	DOM	751	0.9303	1.075	0.15	0.6934	1.248	0.8012	1.442	-0.4821	0.6297	212.209								1.0957	#VALUE!	no
rs4648050	4	103733779	NFKB1	G	A	DOM	749	1.068	0.9361	0.1502	0.7959	1.434	0.6974	1.256	0.4399	0.66	222.42								1.1821	#VALUE!	no
rs4648095	4	103746914	NFKB1	G	A	DOM	752	1.198	0.8346	0.2515	0.7319	1.961	0.5099	1.366	0.7188	0.4723	159.165								1.2953	#VALUE!	no
rs1049253	4	185785945	CASP3	C	T	DOM	750	1.068	0.9367	0.159	0.7817	1.458	0.686	1.279	0.411	0.6811	229.531								1.0861	#VALUE!	no
rs2705897	4	185790092	CASP3	A	C	DOM	750	0.8732	1.145	0.1503	0.6503	1.172	0.853	1.538	-0.9024	0.3668	123.612								1.09	#VALUE!	no
rs2720376	4	185791294	CASP3	G	A	DOM	751	1.09	0.9174	0.1717	0.7785	1.526	0.6552	1.285	0.502	0.6157	207.491								1.0943	#VALUE!	no
rs2705901	4	185796481	CASP3	G	C	DOM	752	0.825	1.212	0.1616	0.601	1.132	0.8831	1.664	-1.191	0.2338	78.7906								1.0891	#VALUE!	no
rs4647610	4	185804925	CASP3	T	C	DOM	752	0.9261	1.08	0.1686	0.6654	1.289	0.7759	1.503	-0.4553	0.6489	218.679								1.3006	#VALUE!	no
rs2720378	4	185805107	CASP3	C	G	DOM	741	1.065	0.939	0.151	0.7921	1.432	0.6984	1.262	0.4167	0.6769	228.115								1.3736	#VALUE!	no
rs4647603	4	185806724	CASP3	T	C	DOM	730	0.9579	1.044	0.164	0.6945	1.321	0.757	1.44	-0.2625	0.7929	267.207								1.1466	#VALUE!	no
rs3775296	4	187234761	TLR3	T	G	DOM	753	0.8741	1.144	0.1566	0.6431	1.188	0.8417	1.555	-0.8595	0.3901	131.464								1.3545	#VALUE!	no
rs1879026	4	187237315	TLR3	T	G	DOM	751	1.013	0.9871	0.1595	0.7411	1.385	0.722	1.349	0.08158	0.935	315.095								1.4305	#VALUE!	no
rs3775291	4	187241068	TLR3	T	C	DOM	750	0.8302	1.205	0.1495	0.6194	1.113	0.8986	1.615	-1.245	0.2132	71.8484								1.225	#VALUE!	no
rs3775290	4	187241211	TLR3	T	C	DOM	753	0.9693	1.032	0.1501	0.7223	1.301	0.7688	1.384	-0.2078	0.8354	281.53								1.208	#VALUE!	no
rs2069187	5	54433806	GZMA	C	T	DOM	752	1.271	0.7868	0.1726	0.9062	1.783	0.561	1.103	1.39	0.1647	55.5039								1.0441	#VALUE!	no
rs1051846	5	54439814	GZMA	C	G	DOM	752	1.321	0.7571	0.182	0.9245	1.887	0.53	1.082	1.529	0.1263	42.5631								1.4476	#VALUE!	no
rs839	5	131847025	IRF1	T	C	DOM	702	1.223	0.8179	0.1581	0.8969	1.667	0.6	1.115	1.271	0.2036	68.6132								0.9391	#VALUE!	no
rs2070729	5	131847820	IRF1	T	G	DOM	745	1.136	0.8801	0.164	0.8239	1.567	0.6382	1.214	0.7789	0.4361	146.966								0.9594	#VALUE!	no
rs17622656	5	131848896	IRF1	A	G	DOM	746	0.7735	1.293	0.1546	0.5712	1.047	0.9548	1.751	-1.661	0.09674	32.6014								0.976	#VALUE!	no
rs1800630	6	31650455	TNF	A	C	DOM	747	0.8151	1.227	0.1653	0.5896	1.127	0.8873	1.696	-1.236	0.2163	72.8931								1.1478	#VALUE!	no
rs3093662	6	31652168	TNF	G	A	DOM	746	1.033	0.9684	0.202	0.6951	1.534	0.6518	1.439	0.1589	0.8737	294.437								1.3923	#VALUE!	no
rs11914	6	137561281	IFNGR1	G	T	DOM	750	0.7758	1.289	0.1606	0.5663	1.063	0.941	1.766	-1.581	0.1138	38.3506								1.2211	#VALUE!	no
rs3799488	6	137561473	IFNGR1	G	A	DOM	751	0.9502	1.052	0.1691	0.6821	1.324	0.7555	1.466	-0.3022	0.7625	256.962								1.4496	#VALUE!	no
rs1327474	6	137582768	IFNGR1	C	T	DOM	747	1.015	0.9853	0.1625	0.7381	1.395	0.7167	1.355	0.0909	0.9276	312.601								1.1704	#VALUE!	no
rs752637	7	128366656	IRF5	T	C	DOM	748	1.128	0.8863	0.1561	0.8309	1.532	0.6528	1.204	0.7731	0.4395	148.112								1.2284	#VALUE!	no
rs3807306	7	128367916	IRF5	T	G	DOM	748	1.36	0.7353	0.1649	0.9843	1.879	0.5323	1.016	1.864	0.0623	20.9951								0.9002	#VALUE!	no
rs1874328	7	128372340	IRF5	C	T	DOM	750	0.9284	1.077	0.1514	0.6901	1.249	0.8006	1.449	-0.4908	0.6235	210.12								1.0424	#VALUE!	no
rs10108662	8	39899146	INDO	A	C	DOM	750	1.02	0.9807	0.1517	0.7575	1.373	0.7285	1.32	0.1287	0.8976	302.491								1.4841	#VALUE!	no
rs3739319	8	39904478	INDO	A	G	DOM	752	1.161	0.8613	0.1551	0.8567	1.574	0.6355	1.167	0.9625	0.3358	113.165								1.0305	#VALUE!	no
rs268561	8	71656476	TRAM1	G	A	DOM	751	0.7905	1.265	0.1497	0.5895	1.06	0.9434	1.696	-1.57	0.1163	39.1931								1.0164	#VALUE!	no
rs7011101	8	71664028	TRAM1	C	A	DOM	751	1.173	0.8525	0.178	0.8276	1.663	0.6015	1.208	0.8966	0.3699	124.656								0.9202	#VALUE!	no
rs3816745	8	71669188	TRAM1	C	G	DOM	752	1.011	0.9889	0.1562	0.7446	1.373	0.7281	1.343	0.07136	0.9431	317.825								1.1324	#VALUE!	no
rs17686100	8	71669566	TRAM1	G	A	DOM	753	1.65	0.6059	0.2207	1.071	2.543	0.3932	0.9338	2.27	0.02318	7.81166								0.8266	#VALUE!	no
rs268594	8	71675684	TRAM1	A	G	DOM	748	1.299	0.7696	0.1506	0.9672	1.746	0.5729	1.034	1.739	0.0821	27.6677								1.4147	#VALUE!	no
rs268598	8	71677425	TRAM1	G	A	DOM	751	0.781	1.28	0.2041	0.5235	1.165	0.8583	1.91	-1.211	0.2259	76.1283								1.1451	#VALUE!	no
rs268600	8	71680925	TRAM1	G	A	DOM	718	0.9671	1.034	0.2498	0.5927	1.578	0.6338	1.687	-0.134	0.8934	301.076								1.2838	#VALUE!	no
rs10429491	9	5040706	JAK2	A	G	DOM	751	1.064	0.9402	0.1519	0.7898	1.432	0.6981	1.266	0.4062	0.6846	230.71								1.706	#VALUE!	no
rs2230724	9	5071780	JAK2	G	A	DOM	750	1.06	0.9435	0.179	0.7463	1.505	0.6643	1.34	0.3251	0.7451	251.099								1.1225	#VALUE!	no
rs12340866	9	5084185	JAK2	A	G	DOM	749	1.008	0.9924	0.1545	0.7444	1.364	0.7331	1.343	0.04936	0.9606	323.722								1.2615	#VALUE!	no
rs3780378	9	5102288	JAK2	G	A	DOM	748	1.169	0.8558	0.1768	0.8263	1.652	0.6052	1.21	0.8811	0.3783	127.487								1.2623	#VALUE!	no
rs3780379	9	5102519	JAK2	A	G	DOM	747	0.961	1.041	0.1595	0.7031	1.314	0.7613	1.422	-0.2493	0.8032	270.678								1.2005	#VALUE!	no
rs10815160	9	5106616	JAK2	C	A	DOM	750	0.8665	1.154	0.1532	0.6418	1.17	0.8548	1.558	-0.9359	0.3493	117.714								1.5773	#VALUE!	no
rs822336	9	5438690	PDCD1L1	G	C	DOM	750	0.8609	1.162	0.1768	0.6088	1.217	0.8214	1.643	-0.8472	0.3969	133.755								1.0326	#VALUE!	no
rs12002985	9	5446587	PDCD1L1	G	C	DOM	752	1.183	0.8456	0.167	0.8525	1.641	0.6096	1.173	1.004	0.3152	106.222								1.0483	#VALUE!	no
rs17804441	9	5447733	PDCD1L1	G	A	DOM	751	0.702	1.424	0.1533	0.5198	0.948	1.055	1.924	-2.308	0.02097	7.06689								1.2129	#VALUE!	no
rs2297137	9	5455732	PDCD1L1	T	C	DOM	737	0.9077	1.102	0.1595	0.664	1.241	0.8059	1.506	-0.607	0.5439	183.294								1.6361	#VALUE!	no
PDCD1L1_017464	9	5456085	PDCD1L	G	A	DOM	750	0.6453	1.55	0.156	0.4753	0.8762	1.141	2.104	-2.807	0.004994	1.68298								1.3388	#VALUE!	no
PDCD1L1_019180	9	5457801	PDCD1L1	A	G	DOM	753	0.8973	1.114	0.2412	0.5593	1.44	0.6947	1.788	-0.4493	0.6532	220.128								1.1469	#VALUE!	no
rs2297136	9	5457955	PDCD1L1	C	T	DOM	751	1.488	0.6718	0.1702	1.066	2.078	0.4813	0.9378	2.337	0.01942	6.54454								1.0126	#VALUE!	no
rs4143815	9	5458257	PDCD1L1	C	G	DOM	748	0.7677	1.303	0.1515	0.5705	1.033	0.968	1.753	-1.745	0.08093	27.2734								0.842	#VALUE!	no
rs16923189	9	5500644	PDCD1LG2	G	A	DOM	751	0.6733	1.485	0.1511	0.5007	0.9055	1.104	1.997	-2.617	0.008876	2.99121								1.3072	#VALUE!	no
rs7854413	9	5547708	PDCD1LG2	G	A	DOM	752	0.9183	1.089	0.1904	0.6323	1.334	0.7498	1.582	-0.4477	0.6544	220.533								1.2794	#VALUE!	no
rs7852996	9	5559860	PDCD1LG2	T	A	DOM	750	0.8606	1.162	0.1932	0.5894	1.257	0.7957	1.697	-0.7769	0.4372	147.336								1.4545	#VALUE!	no
rs1051922	9	21067716	IFNB1	T	C	DOM	751	1.108	0.9023	0.152	0.8227	1.493	0.6698	1.216	0.6763	0.4989	168.129								1.5977	#VALUE!	no
rs28383793	9	21430416	IFNA	G	A	DOM	753	1.513	0.6608	0.2822	0.8705	2.631	0.3801	1.149	1.468	0.142	47.854								1.2295	#VALUE!	no
rs12685904	9	21431310	IFNA	C	A	DOM	750	0.7988	1.252	0.3457	0.4057	1.573	0.6358	2.465	-0.6497	0.5159	173.858								1.0543	#VALUE!	no
rs10985085	9	122705118	TRAF1	A	G	DOM	752	1.223	0.8176	0.2307	0.7781	1.922	0.5202	1.285	0.8726	0.3829	129.037								1.3552	#VALUE!	no
rs4836834	9	122705722	TRAF1	T	A	DOM	753	0.9545	1.048	0.1649	0.691	1.319	0.7584	1.447	-0.2825	0.7776	262.051								1.0921	#VALUE!	no
rs2239657	9	122711341	TRAF1	G	A	DOM	744	0.9035	1.107	0.1553	0.6664	1.225	0.8164	1.501	-0.6536	0.5134	173.016								0.943	#VALUE!	no
rs13440146	9	122721272	TRAF1	A	C	DOM	742	0.9882	1.012	0.2175	0.6453	1.513	0.6607	1.55	-0.05443	0.9566	322.374								1.3552	#VALUE!	no
rs10824792	10	54196212	MBL2	G	A	DOM	750	1.068	0.9359	0.1586	0.7831	1.458	0.6859	1.277	0.4177	0.6762	227.879								1.1838	#VALUE!	no
rs11595876	10	54196768	MBL2	G	A	DOM	753	1.145	0.8732	0.2231	0.7395	1.773	0.5639	1.352	0.6075	0.5435	183.16								1.0467	#VALUE!	no
rs930507	10	54198272	MBL2	G	C	DOM	750	1.075	0.9304	0.1644	0.7788	1.483	0.6741	1.284	0.4392	0.6605	222.588								1.163	#VALUE!	no
rs1838066	10	54199331	MBL2	G	A	DOM	752	0.8373	1.194	0.155	0.618	1.135	0.8814	1.618	-1.145	0.252	84.924								1.4881	#VALUE!	no
rs10824793	10	54199486	MBL2	G	A	DOM	752	0.979	1.021	0.1628	0.7115	1.347	0.7424	1.405	-0.1305	0.8962	302.019								1.1114	#VALUE!	no
rs4647964	10	54201105	MBL2	G	G	DOM	718	NA	NA	NA	NA	NA	NA	NA	NA	NA	#VALUE!								1.402	#VALUE!	no
rs1800450	10	54201241	MBL2	T	C	DOM	753	1.072	0.9328	0.1786	0.7554	1.521	0.6573	1.324	0.3896	0.6968	234.822								1.0411	#VALUE!	no
rs1889490	10	72027719	PRF1	T	C	DOM	749	0.6931	1.443	0.161	0.5055	0.9503	1.052	1.978	-2.277	0.0228	7.6836								1.0541	#VALUE!	no
rs35069510	10	72032901	PRF1	T	C	DOM	747	1.11	0.9012	0.2035	0.7446	1.653	0.6048	1.343	0.511	0.6093	205.334								1.258	#VALUE!	no
rs1800682	10	90739943	FAS	C	T	DOM	748	1.119	0.8935	0.1606	0.817	1.533	0.6522	1.224	0.7015	0.483	162.771								1.12	#VALUE!	no
rs2234978	10	90761809	FAS	A	G	DOM	749	1.116	0.8961	0.1506	0.8307	1.499	0.667	1.204	0.7283	0.4664	157.177								1.1047	#VALUE!	no
rs1051070	10	90764752	FAS	T	A	DOM	746	1.082	0.924	0.196	0.7371	1.589	0.6293	1.357	0.4034	0.6866	231.384								1.568	#VALUE!	no
rs17468739	10	91055929	IFIT2	C	A	DOM	749	0.7097	1.409	0.159	0.5197	0.9692	1.032	1.924	-2.157	0.03101	10.4504								1.349	#VALUE!	no
rs2070845	10	91056055	IFIT2	G	A	DOM	751	0.91	1.099	0.1502	0.6779	1.222	0.8185	1.475	-0.6273	0.5304	178.745								1.2492	#VALUE!	no
rs954439	10	91056440	IFIT2	T	A	DOM	712	0.7608	1.314	0.1741	0.5408	1.07	0.9343	1.849	-1.57	0.1165	39.2605								1.0945	#VALUE!	no
rs1727	10	91056749	IFIT2	C	A	DOM	750	0.7991	1.251	0.151	0.5944	1.074	0.9309	1.682	-1.485	0.1374	46.3038								1.1378	#VALUE!	no
rs303215	10	91146811	IFIT1	G	A	DOM	752	1.133	0.8829	0.1582	0.8306	1.544	0.6475	1.204	0.7871	0.4312	145.314								1.0963	#VALUE!	no
rs11203109	10	91147139	IFIT1	G	A	DOM	751	1.012	0.9879	0.1499	0.7545	1.358	0.7364	1.325	0.0812	0.9353	315.196								#VALUE!	#VALUE!
rs304485	10	91149890	IFIT1	A	T	DOM	750	0.9168	1.091	0.167	0.6609	1.272	0.7862	1.513	-0.5198	0.6032	203.278								0.9979	#VALUE!	no
rs303212	10	91151335	IFIT1	G	A	DOM	752	1.184	0.8449	0.153	0.877	1.597	0.6261	1.14	1.102	0.2705	91.1585								1.0948	#VALUE!	no
rs303211	10	91152477	IFIT1	A	G	DOM	752	1.109	0.902	0.261	0.6648	1.849	0.5409	1.504	0.3952	0.6927	233.44								1.604	#VALUE!	no
rs3809112	11	297036	IFITM2	G	A	DOM	749	1.297	0.7707	0.1523	0.9626	1.749	0.5718	1.039	1.71	0.08733	29.4302								1.3864	#VALUE!	no
rs11246062	11	303755	IFITM1	G	C	DOM	749	1.235	0.8094	0.15	0.9208	1.658	0.6033	1.086	1.41	0.1586	53.4482								1.1849	#VALUE!	no
rs3758650	11	606865	IRF7	A	G	DOM	739	0.6825	1.465	0.2517	0.4167	1.118	0.8946	2.4	-1.517	0.1292	43.5404								1.7167	#VALUE!	no
rs731909	11	2365200	CD81	C	G	DOM	750	0.9525	1.05	0.1721	0.6798	1.335	0.7493	1.471	-0.283	0.7772	261.916								1.0247	#VALUE!	no
rs800335	11	2367517	CD81	G	A	DOM	745	1.125	0.8889	0.16	0.8221	1.539	0.6496	1.216	0.7356	0.462	155.694								1.0651	#VALUE!	no
rs3740961	11	36466647	TRAF6	C	T	DOM	751	1.026	0.9745	0.1764	0.7262	1.45	0.6896	1.377	0.1465	0.8835	297.739								1.0474	#VALUE!	no
rs331457	11	36480188	TRAF6	T	C	DOM	749	0.9427	1.061	0.1722	0.6726	1.321	0.7569	1.487	-0.3428	0.7318	246.617								1.074	#VALUE!	no
rs5030419	11	36487319	TRAF6	G	C	DOM	748	1.345	0.7435	0.1805	0.9442	1.916	0.522	1.059	1.642	0.1006	33.9022								1.0052	#VALUE!	no
rs7127254	11	46265125	CREB3L1	A	G	DOM	752	0.811	1.233	0.1534	0.6004	1.095	0.9129	1.665	-1.366	0.172	57.964								1.1509	#VALUE!	no
rs11038852	11	46270467	CREB3L1	G	C	DOM	750	0.8738	1.144	0.1502	0.651	1.173	0.8526	1.536	-0.898	0.3692	124.42								0.924	#VALUE!	no
rs4625425	11	46289469	CREB3L1	C	A	DOM	750	0.7379	1.355	0.1618	0.5374	1.013	0.987	1.861	-1.879	0.06022	20.2941								1.3011	#VALUE!	no
rs2288249	11	46290815	CREB3L1	A	G	DOM	750	1.48	0.6759	0.2248	0.9523	2.299	0.435	1.05	1.742	0.08144	27.4453								1.0841	#VALUE!	no
rs4963271	11	63061760	RARRES3	G	A	DOM	750	1.426	0.7014	0.1591	1.044	1.947	0.5135	0.9581	2.229	0.02581	8.69797								1.0245	#VALUE!	no
rs1131715	11	69731135	FADD	G	A	DOM	750	0.9202	1.087	0.1626	0.669	1.266	0.7902	1.495	-0.5116	0.6089	205.199								1.0604	#VALUE!	no
rs7115875	11	75737878	PRKRIR	G	A	DOM	745	1.215	0.8228	0.1824	0.8501	1.738	0.5755	1.176	1.069	0.2849	96.0113								1.2942	#VALUE!	no
rs3824908	11	75754968	PRKRIR	C	A	DOM	751	0.9249	1.081	0.1517	0.687	1.245	0.8031	1.456	-0.5148	0.6067	204.458								1.2327	#VALUE!	no
rs7925910	11	75765047	PRKRIR	G	A	DOM	749	1.105	0.9047	0.1693	0.7932	1.54	0.6492	1.261	0.5918	0.554	186.698								1.5168	#VALUE!	no
rs4320976	11	75765492	PRKRIR	A	G	DOM	752	0.8746	1.143	0.1581	0.6415	1.192	0.8387	1.559	-0.8475	0.3967	133.688								1.0986	#VALUE!	no
rs4252249	11	117364419	IL10RA	A	G	DOM	747	1.008	0.9925	0.1851	0.7009	1.448	0.6905	1.427	0.04042	0.9678	326.149								0.8605	#VALUE!	no
rs2508450	11	117369039	IL10RA	A	G	DOM	753	0.8593	1.164	0.1708	0.6149	1.201	0.8327	1.626	-0.888	0.3746	126.24								1.2496	#VALUE!	no
rs3135932	11	117369273	IL10RA	G	A	DOM	752	1.165	0.8586	0.1661	0.841	1.613	0.62	1.189	0.9177	0.3588	120.916								1.3348	#VALUE!	no
rs4252314	11	117373727	IL10RA	G	A	DOM	752	1.338	0.7474	0.313	0.7244	2.471	0.4047	1.38	0.9301	0.3523	118.725								1.2332	#VALUE!	no
rs2229113	11	117374880	IL10RA	A	G	DOM	749	0.8824	1.133	0.1585	0.6467	1.204	0.8306	1.546	-0.7892	0.43	144.91								0.9594	#VALUE!	no
rs9610	11	117377296	IL10RA	A	G	DOM	753	1.088	0.9189	0.1652	0.7872	1.504	0.6647	1.27	0.5119	0.6087	205.132								1.1516	#VALUE!	no
rs8177352	11	125659053	TIRAP	G	A	DOM	739	1.151	0.8685	0.156	0.8481	1.563	0.6398	1.179	0.9038	0.3661	123.376								1.3199	#VALUE!	no
rs3802813	11	125667678	TIRAP	A	G	DOM	751	1.136	0.8806	0.271	0.6677	1.931	0.5178	1.498	0.4691	0.639	215.343								1.2221	#VALUE!	no
rs3802814	11	125667817	TIRAP	A	G	DOM	751	1.112	0.8992	0.1659	0.8034	1.54	0.6495	1.245	0.6405	0.5218	175.847								0.9007	#VALUE!	no
rs8177375	11	125668274	TIRAP	G	A	DOM	752	0.8746	1.143	0.1769	0.6184	1.237	0.8085	1.617	-0.7579	0.4485	151.144								0.923	#VALUE!	no
rs8177376	11	125668822	TIRAP	C	A	DOM	751	0.9696	1.031	0.1539	0.7171	1.311	0.7628	1.394	-0.2004	0.8412	283.484								1.0489	#VALUE!	no
rs625413	11	125669559	TIRAP	A	G	DOM	752	1.118	0.8948	0.1526	0.8286	1.507	0.6635	1.207	0.728	0.4666	157.244								1.2915	#VALUE!	no
rs1786704	11	125670967	TIRAP	G	A	DOM	751	1.067	0.9375	0.1611	0.7779	1.463	0.6836	1.286	0.4009	0.6885	232.024								1.1776	#VALUE!	no
rs17199006	12	7775618	CLEC4C	G	A	DOM	752	0.7764	1.288	0.1622	0.565	1.067	0.9372	1.77	-1.56	0.1187	40.0019								1.5176	#VALUE!	no
rs1894823	12	7781816	CLEC4C	A	G	DOM	750	0.7349	1.361	0.1547	0.5426	0.9953	1.005	1.843	-1.99	0.04655	15.6874								0.9352	#VALUE!	no
rs10845821	12	7791451	CLEC4C	A	G	DOM	751	1.037	0.9644	0.1587	0.7597	1.415	0.7066	1.316	0.2287	0.8191	276.037								1.4429	#VALUE!	no
rs4251460	12	42449035	IRAK4	C	A	DOM	750	1.353	0.7389	0.1963	0.921	1.988	0.5029	1.086	1.541	0.1233	41.5521								1.8658	#VALUE!	no
rs4251513	12	42460471	IRAK4	G	C	DOM	751	1.152	0.8677	0.1731	0.821	1.618	0.6181	1.218	0.82	0.4122	138.911								1.8115	#VALUE!	no
rs4251580	12	42461033	IRAK4	A	G	DOM	750	0.9643	1.037	0.1749	0.6845	1.359	0.7361	1.461	-0.2079	0.8353	281.496								1.5157	#VALUE!	no
rs4251520	12	42461605	IRAK4	G	A	DOM	749	1.07	0.9349	0.1883	0.7396	1.547	0.6464	1.352	0.3576	0.7206	242.842								1.4594	#VALUE!	no
rs4251545	12	42466562	IRAK4	A	G	DOM	749	1.225	0.8162	0.2043	0.821	1.828	0.5469	1.218	0.9943	0.3201	107.874								1.0205	#VALUE!	no
rs1544410	12	46526102	VDR	T	C	DOM	751	0.9047	1.105	0.1529	0.6704	1.221	0.819	1.492	-0.6545	0.5128	172.814								1.0377	#VALUE!	no
rs2066807	12	55026949	STAT2	G	C	DOM	752	1.144	0.8742	0.1993	0.774	1.691	0.5915	1.292	0.6746	0.4999	168.466								1.3281	#VALUE!	no
rs7316037	12	63133078	TBK1	A	G	DOM	739	1.326	0.7544	0.2084	0.8811	1.994	0.5014	1.135	1.352	0.1762	59.3794								1.0951	#VALUE!	no
rs11175398	12	63137245	TBK1	G	A	DOM	747	0.6059	1.65	0.1673	0.4365	0.8411	1.189	2.291	-2.994	0.002753	0.927761								1.0266	#VALUE!	no
rs10878175	12	63153605	TBK1	C	G	DOM	748	0.8502	1.176	0.1521	0.6311	1.146	0.873	1.585	-1.067	0.2861	96.4157								1.2579	#VALUE!	no
rs7303577	12	63160369	TBK1	C	A	DOM	753	0.6113	1.636	0.1755	0.4333	0.8622	1.16	2.308	-2.805	0.005036	1.69713								1.1506	#VALUE!	no
rs2069727	12	66834490	IFNG	C	T	DOM	748	0.8786	1.138	0.1611	0.6407	1.205	0.83	1.561	-0.8034	0.4217	142.113								1.1231	#VALUE!	no
rs2069718	12	66836429	IFNG	T	C	DOM	752	1.123	0.8908	0.1578	0.824	1.529	0.6538	1.214	0.7331	0.4635	156.2								1.4748	#VALUE!	no
rs2069716	12	66837082	IFNG	C	T	DOM	750	0.8807	1.135	0.2305	0.5606	1.384	0.7227	1.784	-0.5512	0.5815	195.965								1.0735	#VALUE!	no
rs1861494	12	66837676	IFNG	G	A	DOM	749	1.055	0.9481	0.1507	0.785	1.417	0.7056	1.274	0.3538	0.7235	243.82								1.8173	#VALUE!	no
rs10744785	12	111829639	OAS1	G	C	DOM	748	0.8627	1.159	0.174	0.6134	1.213	0.8242	1.63	-0.8487	0.396	133.452								1.2424	#VALUE!	yes
rs34137742	12	111833044	OAS1	A	G	DOM	724	0.9747	1.026	0.2164	0.6377	1.49	0.6713	1.568	-0.1186	0.9056	305.187								1.126	#VALUE!	no
rs3741981	12	111833253	OAS1	G	A	DOM	751	1.104	0.9058	0.2202	0.717	1.7	0.5883	1.395	0.4493	0.6532	220.128								1.0988	#VALUE!	no
OAS1_004547	12	111833482	OAS1	A	G	DOM	744	0.8113	1.233	0.2264	0.5205	1.265	0.7908	1.921	-0.9234	0.3558	119.905								1.1232	#VALUE!	no
rs10774671	12	111841576	OAS1	G	A	DOM	751	1.199	0.834	0.254	0.7288	1.973	0.5069	1.372	0.7145	0.4749	160.041								0.9962	#VALUE!	no
rs1859330	12	111860771	OAS3	C	T	DOM	730	1.484	0.674	0.2617	0.8884	2.478	0.4036	1.126	1.508	0.1316	44.3492								0.7581	#VALUE!	no
rs7961861	12	111870301	OAS3	G	A	DOM	741	1.178	0.8486	0.2422	0.7331	1.894	0.5279	1.364	0.678	0.4978	167.759								1.2991	#VALUE!	no
rs2285933	12	111871162	OAS3	G	C	DOM	752	0.7658	1.306	0.2455	0.4733	1.239	0.8071	2.113	-1.087	0.2771	93.3827								1.0317	#VALUE!	no
rs2285932	12	111871333	OAS3	T	C	DOM	750	1.157	0.8642	0.2585	0.6972	1.921	0.5206	1.434	0.5647	0.5723	192.865								1.5705	#VALUE!	no
rs2072136	12	111883302	OAS3	T	C	DOM	753	1.081	0.9251	0.17	0.7747	1.509	0.6629	1.291	0.4582	0.6468	217.972								1.1227	#VALUE!	no
OAS3_026920	12	111885590	OAS3	A	G	DOM	744	0.7997	1.251	0.2303	0.5092	1.256	0.7963	1.964	-0.9707	0.3317	111.783								1.1393	#VALUE!	no
OAS3_029396	12	111888066	OAS3	A	G	DOM	735	0.8295	1.206	0.2511	0.507	1.357	0.7369	1.972	-0.7444	0.4566	153.874								1.3743	#VALUE!	no
rs2240188	12	111888067	OAS3	T	C	DOM	734	0.8071	1.239	0.2578	0.4869	1.338	0.7475	2.054	-0.8312	0.4059	136.788								0.9628	#VALUE!	no
rs2010549	12	111893380	OAS3	G	C	DOM	748	1.166	0.8574	0.1743	0.8288	1.641	0.6094	1.206	0.8827	0.3774	127.184								1.4571	#VALUE!	no
rs2072133	12	111893643	OAS3	C	T	DOM	751	0.811	1.233	0.2099	0.5375	1.224	0.8172	1.861	-0.9984	0.3181	107.2								1.0486	#VALUE!	no
rs7138261	12	111894353	OAS3	A	G	DOM	709	0.8824	1.133	0.2413	0.5499	1.416	0.7062	1.818	-0.5184	0.6042	203.615								1.0908	#VALUE!	no
rs2072138	12	111909276	OAS2	C	G	DOM	750	0.6125	1.633	0.2328	0.3881	0.9667	1.034	2.577	-2.105	0.03526	11.8826								1.2119	#VALUE!	no
rs35992364	12	111917267	OAS2	G	A	DOM	753	1.235	0.8095	0.2177	0.8062	1.893	0.5283	1.24	0.9707	0.3317	111.783								1.0272	#VALUE!	yes
rs1293755	12	111919833	OAS2	T	A	DOM	750	1.133	0.8823	0.257	0.6849	1.876	0.5332	1.46	0.4871	0.6262	211.029								1.287	#VALUE!	no
rs2072137	12	111925304	OAS2	C	T	DOM	751	0.7866	1.271	0.2038	0.5276	1.173	0.8526	1.896	-1.178	0.2389	80.5093								1.333	#VALUE!	no
rs929291	12	111928801	OAS2	T	C	DOM	746	1.315	0.7606	0.2356	0.8285	2.086	0.4793	1.207	1.161	0.2454	82.6998								1.4813	#VALUE!	yes
rs916973	12	111931486	OAS2	C	T	DOM	748	1.241	0.806	0.2317	0.7879	1.954	0.5118	1.269	0.9311	0.3518	118.557								0.9357	#VALUE!	no
rs15895	12	111932671	OAS2	T	C	DOM	753	1.234	0.8107	0.2159	0.8079	1.883	0.531	1.238	0.9719	0.3311	111.581								1.4502	#VALUE!	no
rs13311	12	111933035	OAS2	A	C	DOM	751	0.7289	1.372	0.1985	0.4939	1.076	0.9297	2.025	-1.593	0.1112	37.4744								1.3648	#VALUE!	no
rs1296371	12	111934088	OAS2	C	T	DOM	730	1.012	0.9879	0.1627	0.7358	1.393	0.7181	1.359	0.07501	0.9402	316.847								1.088	#VALUE!	no
rs12819210	12	119942783	OASL	A	G	DOM	753	1.33	0.752	0.1579	0.9759	1.812	0.5519	1.025	1.805	0.07102	23.9337								1.4968	#VALUE!	no
rs3213546	12	119955599	OASL	C	G	DOM	752	1.053	0.9495	0.3375	0.5435	2.041	0.49	1.84	0.1535	0.878	295.886								0.9099	#VALUE!	no
rs3213545	12	119955720	OASL	T	C	DOM	749	0.8239	1.214	0.1508	0.613	1.107	0.9031	1.631	-1.284	0.1991	67.0967								1.3655	#VALUE!	no
rs10774580	12	119960806	OASL	A	G	DOM	751	0.7367	1.357	0.1606	0.5378	1.009	0.9909	1.859	-1.903	0.05706	19.2292								1.5515	#VALUE!	no
rs28360475	12	119961429	OASL	G	A	DOM	750	1.666	0.6003	0.1578	1.223	2.27	0.4405	0.8179	3.234	0.001222	0.411814								1.0408	#VALUE!	no
rs2236350	14	23700850	ISGF3G	T	G	DOM	748	1.059	0.9445	0.1873	0.7333	1.528	0.6543	1.364	0.3045	0.7607	256.356								0.8522	#VALUE!	no
rs12436555	14	23704665	ISGF3G	A	G	DOM	748	1.144	0.8743	0.1638	0.8298	1.577	0.6342	1.205	0.8206	0.4119	138.81								0.8373	#VALUE!	no
rs2236338	14	24170122	GZMB	G	A	DOM	750	1.266	0.7901	0.156	0.9322	1.718	0.5819	1.073	1.51	0.131	44.147								1.4183	#VALUE!	no
rs11539752	14	24171429	GZMB	C	G	DOM	749	1.083	0.9236	0.1561	0.7973	1.47	0.6801	1.254	0.5088	0.6109	205.873								0.8156	#VALUE!	no
rs2273844	14	24173254	GZMB	A	G	DOM	752	1.096	0.9121	0.1557	0.808	1.488	0.6721	1.238	0.5911	0.5545	186.867								1.0879	#VALUE!	no
rs28489163	14	93645984	IFI27	A	G	DOM	751	1.558	0.6417	0.1796	1.096	2.216	0.4513	0.9124	2.471	0.01349	4.54613								1.0678	#VALUE!	no
IFI27_000630	14	93646335	IFI27	G	C	DOM	752	1.074	0.9312	0.1567	0.7898	1.46	0.685	1.266	0.4545	0.6495	218.881								0.9461	#VALUE!	no
rs3814821	14	93646690	IFI27	T	C	DOM	753	0.7986	1.252	0.1663	0.5765	1.106	0.9039	1.735	-1.352	0.1763	59.4131								0.8213	#VALUE!	no
rs2799	14	93652679	IFI27	C	G	DOM	741	1.103	0.9065	0.2309	0.7016	1.734	0.5765	1.425	0.4252	0.6707	226.026								1.0381	#VALUE!	no
IFI27_007273	14	93652978	IFI27	0	C	DOM	752	NA	NA	NA	NA	NA	NA	NA	NA	NA	#VALUE!								#VALUE!	#VALUE!
rs1243081	14	93653215	IFI27	A	G	DOM	712	1.588	0.6298	0.1858	1.103	2.286	0.4375	0.9065	2.488	0.01284	4.32708								1.1318	#VALUE!	no
rs7141881	14	93653617	IFI27	A	G	DOM	750	1.436	0.6966	0.1556	1.058	1.947	0.5135	0.9449	2.325	0.02009	6.77033								1.1374	#VALUE!	no
rs1243082	14	93653748	IFI27	A	C	DOM	751	1.213	0.8244	0.2293	0.7739	1.901	0.526	1.292	0.8421	0.3997	134.699								1.0797	#VALUE!	no
rs10132928	14	93654162	IFI27	G	A	DOM	751	1.502	0.6658	0.1715	1.073	2.102	0.4757	0.9318	2.372	0.0177	5.9649								1.0537	#VALUE!	no
rs4780355	16	11255359	SOCS1	G	A	DOM	736	1.144	0.8742	0.1502	0.8522	1.536	0.6512	1.173	0.8952	0.3707	124.926								1.0244	#VALUE!	no
rs243330	16	11258492	SOCS1	T	C	DOM	735	0.8004	1.249	0.1655	0.5786	1.107	0.9033	1.728	-1.345	0.1785	60.1545								1.4145	#VALUE!	no
rs3760396	17	29605554	CCL2	G	C	DOM	753	0.7471	1.339	0.1555	0.5508	1.013	0.9869	1.816	-1.875	0.06081	20.493								0.9277	#VALUE!	no
rs2857656	17	29606120	CCL2	G	C	DOM	748	1.226	0.8157	0.1498	0.914	1.644	0.6082	1.094	1.36	0.1739	58.6043								0.9655	#VALUE!	no
rs4586	17	29607382	CCL2	G	A	DOM	751	1.292	0.7739	0.1538	0.9559	1.747	0.5725	1.046	1.667	0.09555	32.2004								1.384	#VALUE!	no
rs4969168	17	73865388	SOCS3	A	G	DOM	747	0.8215	1.217	0.167	0.5922	1.14	0.8774	1.689	-1.177	0.2391	80.5767								1.4945	#VALUE!	no
rs2292151	19	4767719	TICAM1	T	C	DOM	748	1.053	0.9492	0.152	0.7821	1.419	0.7047	1.279	0.3428	0.7318	246.617								1.3954	#VALUE!	no
rs7255265	19	4769378	TICAM1	A	G	DOM	751	0.9968	1.003	0.1521	0.7399	1.343	0.7446	1.352	-0.02084	0.9834	331.406								1.0222	#VALUE!	no
rs12609318	19	6614916	TNFSF14	A	G	DOM	747	1.006	0.994	0.1501	0.7496	1.35	0.7407	1.334	0.03993	0.9681	326.25								1.2789	#VALUE!	no
rs1077667	19	6619972	TNFSF14	T	C	DOM	752	0.9074	1.102	0.1534	0.6717	1.226	0.8159	1.489	-0.6337	0.5263	177.363								1.1551	#VALUE!	no
rs8106574	19	6622142	TNFSF14	A	G	DOM	744	0.9649	1.036	0.1522	0.7159	1.3	0.769	1.397	-0.235	0.8142	274.385								1.1573	#VALUE!	no
rs8112310	19	7710320	CD209	A	T	DOM	752	1.322	0.7563	0.1704	0.9467	1.847	0.5415	1.056	1.639	0.1012	34.1044								1.2555	#VALUE!	no
rs4804801	19	7713482	CD209	T	A	DOM	716	1.401	0.7136	0.2412	0.8735	2.248	0.4448	1.145	1.399	0.1618	54.5266								1.4528	#VALUE!	no
rs4804802	19	7713610	CD209	A	G	DOM	752	0.8326	1.201	0.1944	0.5688	1.219	0.8204	1.758	-0.9421	0.3461	116.636								0.9267	#VALUE!	no
rs8105572	19	7715327	CD209	A	G	DOM	747	1.065	0.9394	0.1798	0.7484	1.514	0.6605	1.336	0.3478	0.728	245.336								0.9361	#VALUE!	no
rs11465384	19	7716006	CD209	T	C	DOM	750	0.9401	1.064	0.2065	0.6272	1.409	0.7097	1.594	-0.2992	0.7648	257.738								0.9548	#VALUE!	no
rs2287886	19	7718536	CD209	A	G	DOM	749	0.7794	1.283	0.1516	0.579	1.049	0.9532	1.727	-1.644	0.1003	33.8011								1.2554	#VALUE!	no
rs735240	19	7719336	CD209	A	G	DOM	750	0.7789	1.284	0.1688	0.5595	1.084	0.9223	1.787	-1.481	0.1387	46.7419								1.3759	#VALUE!	no
rs7252764	19	7733137	CLEC4M	A	G	DOM	749	1.328	0.7529	0.2693	0.7834	2.252	0.4441	1.276	1.054	0.292	98.404								1.698	#VALUE!	no
rs2287887	19	7733955	CLEC4M	C	A	DOM	749	0.8152	1.227	0.1489	0.6088	1.091	0.9162	1.643	-1.372	0.17	57.29								1.5305	#VALUE!	no
rs868876	19	7737226	CLEC4M	A	T	DOM	750	0.8891	1.125	0.1539	0.6576	1.202	0.8319	1.521	-0.764	0.4449	149.931								0.9168	#VALUE!	no
rs475896	19	7737429	CLEC4M	C	G	DOM	752	1.007	0.9931	0.1642	0.7298	1.389	0.7197	1.37	0.04233	0.9662	325.609								1.1882	#VALUE!	no
rs558705	19	7738183	CLEC4M	T	C	DOM	747	0.6593	1.517	0.181	0.4625	0.9401	1.064	2.162	-2.302	0.02136	7.19832								1.1192	#VALUE!	no
rs557094	19	7738286	CLEC4M	G	C	DOM	749	1.1	0.9089	0.1832	0.7684	1.575	0.6348	1.301	0.5214	0.6021	202.908								0.9399	#VALUE!	no
rs2161525	19	7738664	CLEC4M	G	A	DOM	747	1.283	0.7796	0.1603	0.9369	1.756	0.5695	1.067	1.553	0.1204	40.5748								1.1012	#VALUE!	no
rs8113469	19	7738959	CLEC4M	G	A	DOM	745	0.7245	1.38	0.1505	0.5394	0.9732	1.028	1.854	-2.141	0.0323	10.8851								1.1441	#VALUE!	no
rs12610506	19	7739071	CLEC4M	A	G	DOM	751	0.9092	1.1	0.1555	0.6703	1.233	0.8109	1.492	-0.6119	0.5406	182.182								1.2705	#VALUE!	no
rs3745376	19	7739690	CLEC4M	A	C	DOM	750	1.33	0.7518	0.165	0.9628	1.838	0.5441	1.039	1.73	0.08366	28.1934								1.4346	#VALUE!	no
rs15282	19	7740274	CLEC4M	T	C	DOM	752	1.27	0.7876	0.1485	0.949	1.699	0.5887	1.054	1.608	0.1079	36.3623								1.0921	#VALUE!	no
rs2304207	19	54859538	IRF3	C	G	DOM	750	0.5376	1.86	0.1598	0.3931	0.7354	1.36	2.544	-3.884	0.0001029	0.0346773								2.0198	#VALUE!	no
rs2304204	19	54860832	IRF3	C	T	DOM	751	0.7702	1.298	0.15	0.5741	1.033	0.9677	1.742	-1.741	0.08168	27.5262								1.448	#VALUE!	no
rs752118	20	44180145	CD40	A	G	DOM	749	1.005	0.9954	0.1539	0.7431	1.358	0.7362	1.346	0.03006	0.976	328.912								1.1676	#VALUE!	no
rs745307	20	44180493	CD40	T	C	DOM	745	0.9303	1.075	0.1535	0.6886	1.257	0.7956	1.452	-0.4703	0.6381	215.04								1.1493	#VALUE!	no
rs3765457	20	44190620	CD40	G	A	DOM	751	1.078	0.9274	0.1748	0.7655	1.519	0.6584	1.306	0.431	0.6665	224.611								1.1022	#VALUE!	no
rs3765459	20	44190814	CD40	A	G	DOM	747	0.9873	1.013	0.1546	0.7292	1.337	0.748	1.371	-0.08249	0.9343	314.859								1.2285	#VALUE!	no
rs11569345	20	44191928	CD40	A	G	DOM	752	1.198	0.8344	0.313	0.6489	2.213	0.4518	1.541	0.5784	0.563	189.731								1.1474	#VALUE!	no
rs11569348	20	44192680	CD40	A	C	DOM	748	1.057	0.946	0.1804	0.7423	1.505	0.6643	1.347	0.3078	0.7582	255.513								1.1264	#VALUE!	no
rs2226299	21	33620794	IFNAR1	A	G	DOM	745	0.8218	1.217	0.1606	0.5998	1.126	0.8883	1.667	-1.222	0.2216	74.6792								1.1084	#VALUE!	no
rs2252930	21	33626071	IFNAR1	C	G	DOM	752	1.343	0.7446	0.1509	0.9991	1.805	0.5539	1.001	1.954	0.0507	17.0859								0.933	#VALUE!	no
rs2252931	21	33626190	IFNAR1	A	G	DOM	752	1.33	0.7517	0.1509	0.9897	1.788	0.5592	1.01	1.892	0.05855	19.7313								1.0673	#VALUE!	no
rs17643419	21	33633668	IFNAR1	A	G	DOM	752	0.9477	1.055	0.213	0.6243	1.439	0.6951	1.602	-0.2524	0.8008	269.87								1.0773	#VALUE!	no
rs2253923	21	33634289	IFNAR1	A	T	DOM	753	0.8233	1.215	0.1531	0.6099	1.111	0.8997	1.64	-1.27	0.2042	68.8154								0.8836	#VALUE!	no
rs2257167	21	33637569	IFNAR1	G	C	DOM	750	0.8616	1.161	0.1727	0.6142	1.209	0.8273	1.628	-0.8622	0.3886	130.958								1.344	#VALUE!	no
rs12483293	21	33638659	IFNAR1	C	A	DOM	751	0.802	1.247	0.1507	0.5969	1.078	0.9279	1.675	-1.464	0.1433	48.2921								1.7179	#VALUE!	no
rs2243600	21	33645531	IFNAR1	A	C	DOM	752	0.8381	1.193	0.151	0.6234	1.127	0.8875	1.604	-1.17	0.2421	81.5877								1.4128	#VALUE!	no
rs2834202	21	33652824	IFNAR1	G	A	DOM	748	0.8064	1.24	0.1517	0.5991	1.086	0.9212	1.669	-1.419	0.156	52.572								1.1968	#VALUE!	no
rs9808753	21	33709182	IFNGR2	G	A	DOM	751	1.05	0.952	0.1701	0.7526	1.466	0.6821	1.329	0.2893	0.7724	260.299								1.1221	#VALUE!	no
rs11910627	21	33721220	IFNGR2	G	C	DOM	751	1.007	0.9931	0.1494	0.7514	1.349	0.7411	1.331	0.04641	0.963	324.531								1.0681	#VALUE!	no
rs1059293	21	33731563	IFNGR2	A	G	DOM	753	0.986	1.014	0.1658	0.7125	1.365	0.7328	1.404	-0.08474	0.9325	314.252								0.9026	#VALUE!	no
rs2071430	21	41719935	MX1	0	C	DOM	741	NA	NA	NA	NA	NA	NA	NA	NA	NA	NA								1.2005	#VALUE!	no
rs7280422	21	41723437	MX1	C	G	DOM	747	0.6455	1.549	0.1689	0.4636	0.8987	1.113	2.157	-2.592	0.009538	3.21431								1.3917	#VALUE!	no
rs455599	21	41726549	MX1	G	A	DOM	752	1.944	0.5144	0.2468	1.198	3.153	0.3172	0.8344	2.694	0.007065	2.3809								0.7631	#VALUE!	yes
rs457347	21	41726740	MX1	G	A	DOM	749	1.939	0.5157	0.2474	1.194	3.149	0.3176	0.8374	2.677	0.007422	2.50121								0.7612	#VALUE!	yes
rs468672	21	41728034	MX1	A	T	DOM	737	1.774	0.5638	0.2232	1.145	2.747	0.3641	0.8732	2.568	0.01023	3.44751								1.1798	#VALUE!	no
rs2838036	21	41729610	MX1	A	T	DOM	751	0.6165	1.622	0.3422	0.3152	1.206	0.8294	3.172	-1.413	0.1576	53.1112								1.4363	#VALUE!	no
rs8132871	21	41732690	MX1	A	G	DOM	748	0.703	1.422	0.1745	0.4994	0.9897	1.01	2.002	-2.02	0.04343	14.6359								#VALUE!	#VALUE!
rs467558	21	41733265	MX1	G	A	DOM	746	1.963	0.5094	0.2171	1.283	3.004	0.3329	0.7796	3.107	0.001889	0.636593								1.0639	#VALUE!	no
rs467960	21	41734761	MX1	G	A	DOM	753	1.422	0.7032	0.2298	0.9065	2.231	0.4482	1.103	1.533	0.1254	42.2598								1.2832	#VALUE!	no
rs469390	21	41739800	MX1	G	A	DOM	753	1.525	0.6556	0.228	0.9756	2.384	0.4194	1.025	1.852	0.06405	21.5848								1.9642	#VALUE!	no
rs7277299	21	41740660	MX1	A	C	DOM	752	1.174	0.8518	0.2255	0.7545	1.826	0.5475	1.325	0.7111	0.4771	160.783								1.1403	#VALUE!	no
rs467639	21	41741434	MX1	A	T	DOM	749	1.168	0.8563	0.2076	0.7775	1.754	0.57	1.286	0.7474	0.4548	153.268								1.3337	#VALUE!	no
rs2070229	21	41742983	MX1	G	A	DOM	751	1.17	0.8545	0.2128	0.7712	1.776	0.563	1.297	0.7391	0.4599	154.986								0.787	#VALUE!	no
rs469218	21	41743564	MX1	A	G	DOM	698	0.885	1.13	0.3481	0.4473	1.751	0.5711	2.236	-0.3509	0.7256	244.527								0.9783	#VALUE!	no
rs3737399	21	41745242	MX1	A	G	DOM	747	1.031	0.9697	0.2271	0.6608	1.609	0.6214	1.513	0.1354	0.8923	300.705								0.8955	#VALUE!	no
rs1050008	21	41746531	MX1	G	A	DOM	752	1.143	0.8749	0.1932	0.7826	1.669	0.5991	1.278	0.6914	0.4893	164.894								0.7265	#VALUE!	no
rs467593	21	41748421	MX1	G	A	DOM	748	1.12	0.8932	0.2152	0.7344	1.707	0.5858	1.362	0.525	0.5996	202.065								1.1425	#VALUE!	no
rs468811	21	41751716	MX1	A	G	DOM	752	1.046	0.9558	0.1845	0.7287	1.502	0.6658	1.372	0.2448	0.8066	271.824								1.4781	#VALUE!	no
rs13433394	21	41753780	MX1	A	G	DOM	751	1.236	0.8091	0.1692	0.8871	1.722	0.5808	1.127	1.252	0.2107	71.0059								1.3681	#VALUE!	no
rs4819387	21	44471630	B7H2	A	G	DOM	753	0.8952	1.117	0.1662	0.6463	1.24	0.8065	1.547	-0.6661	0.5054	170.32								1.268	#VALUE!	no
rs4819388	21	44471849	B7H2	A	G	DOM	749	0.9528	1.05	0.1505	0.7094	1.28	0.7815	1.41	-0.3216	0.7478	252.009								1.5965	#VALUE!	no
rs11558819	21	44481202	B7H2	T	C	DOM	750	0.7769	1.287	0.1493	0.5797	1.041	0.9606	1.725	-1.691	0.09088	30.6266								1.3977	#VALUE!	no
rs378299	21	44485771	B7H2	C	T	DOM	740	0.8008	1.249	0.1638	0.5809	1.104	0.9059	1.722	-1.356	0.1749	58.9413								1.3776	#VALUE!	no
Legend
SNP	Single Nucleotide Polymorphisms
CHR	Chromosome
Position	Genomic Position
Gene	HUGO gene name
Minor Allele	Minor allele according to the frequency reported for this dataset
Major Allele	Major allele according to the frequency reported for this dataset
TEST	Association test performed
n	Number of individuals included in the analysis
OR Minor Allele	Odds ratio using the minor allele
OR Major Allele	Odds ratio using the major allele
SE	Standard Error
L95 Minor Allele	Lower 95% Confidence Interval for the odds ratio calculated for the minor allele
U95 Minor Allele	Upper 95% Confidence Interval for the odds ratio calculated for the minor allele
L95 Major Allele	Lower 95% Confidence Interval for the odds ratio calculated for the major allele
U95 Major Allele	Upper 95% Confidence Interval for the odds ratio calculated for the major allele
STAT	Coefficient t-statistic
P-value	Asymptotic p-value for t-statistic
Bonferroni p-value	Bonferroni corrected p-value
