# Supplementary material for: Host Genetic Risk Factors for West Nile Virus Infection and Disease Progression
Source: PLoS One. 2011 Sep 15;6(9):e24745. doi: 10.1371/journal.pone.0024745 (PMC3174177; doi:10.1371/journal.pone.0024745)
Supplement: Table S8 — Symptomatic vs. asymptomatic logistic regression analysis results for a recessive model of inheritance. (XLS) [file pone.0024745.s008.xls]

## Sheet: Sheet1
Table S8. Symptomatic vs. asymptomatic logistic regression analysis results for a recessive model of inheritance. Odds Ratios were calculated using logistic regression. The first five PC's were included as covariates to control for population stratification.
SNP	CHR	Position	Gene	Minor Allele	Major Allele	TEST	n	OR Minor Allele	OR Major Allele	SE	L95 Minor Allele	U95 Minor Allele	L95 Major Allele	U95 Major Allele	STAT	P-value	Bonferroni P-Value
rs2254002	1	65074257	JAK1	T	G	REC	751	0.9699	1.031	0.2663	0.5755	1.635	0.6117	1.738	-0.1146	0.9087	306.232
rs4916004	1	65076098	JAK1	A	G	REC	750	4.088	0.2446	1.089	0.4837	34.55	0.02895	2.067	1.293	0.196	66.052
rs310244	1	65078465	JAK1	T	C	REC	750	0.5106	1.958	0.4163	0.2258	1.155	0.866	4.429	-1.614	0.1064	35.8568
rs310247	1	65079997	JAK1	T	C	REC	750	1.126	0.8882	0.2478	0.6927	1.83	0.5465	1.444	0.4782	0.6325	213.152
rs2230587	1	65083850	JAK1	T	C	REC	752	1.86	0.5376	0.5975	0.5767	5.999	0.1667	1.734	1.039	0.2989	100.729
rs10789166	1	65085401	JAK1	G	A	REC	752	0.4836	2.068	0.4524	0.1992	1.174	0.852	5.019	-1.606	0.1083	36.4971
rs310219	1	65087886	JAK1	T	C	REC	749	0.6973	1.434	0.3432	0.3559	1.366	0.7319	2.81	-1.05	0.2935	98.9095
rs188698	1	65091172	JAK1	C	T	REC	752	0.796	1.256	0.2931	0.4482	1.414	0.7073	2.231	-0.7786	0.4362	146.999
rs2256298	1	65103270	JAK1	T	C	REC	745	1.109	0.9016	0.3276	0.5836	2.108	0.4744	1.713	0.3162	0.7518	253.357
rs11585932	1	65107683	JAK1	G	A	REC	745	0.3542	2.823	1.232	0.03168	3.96	0.2525	31.56	-0.8426	0.3995	134.632
rs12135754	1	65115093	JAK1	C	A	REC	752	4.026	0.2484	1.088	0.4771	33.97	0.02944	2.096	1.28	0.2006	67.6022
rs310201	1	65122196	JAK1	C	T	REC	752	1.086	0.9207	0.3477	0.5495	2.147	0.4658	1.82	0.2375	0.8123	273.745
rs310199	1	65122710	JAK1	C	T	REC	752	1.285	0.7783	0.2874	0.7315	2.257	0.4432	1.367	0.8719	0.3832	129.138
rs310198	1	65123656	JAK1	A	G	REC	750	0.3633	2.753	0.6114	0.1096	1.204	0.8304	9.125	-1.656	0.09771	32.9283
rs10802189	1	116858253	CD58	A	G	REC	748	0.8059	1.241	0.2363	0.5072	1.281	0.7809	1.972	-0.9131	0.3612	121.724
rs17036001	1	116916652	CD58	A	G	REC	745	1052000000	9.505e-10	2.438	0	1.#IO	0	1.#IO	0.0008522	0.9993	336.764
rs1335531	1	116916900	CD58	G	C	REC	746	1.202	0.8322	0.3318	0.6271	2.303	0.4343	1.595	0.5537	0.5798	195.393
rs6701046	1	117099257	CD2	G	A	REC	748	0.9944	1.006	0.3525	0.4983	1.984	0.504	2.007	-0.01592	0.9873	332.72
rs3136705	1	117104923	CD2	A	G	REC	752	0.4531	2.207	0.5388	0.1576	1.302	0.7678	6.345	-1.469	0.1417	47.7529
rs798043	1	117105020	CD2	T	C	REC	752	1.295	0.7722	0.3446	0.659	2.545	0.393	1.517	0.75	0.4532	152.728
rs1801274	1	159746369	FCGR2A	T	C	REC	752	0.7365	1.358	0.1677	0.5302	1.023	0.9774	1.886	-1.824	0.0682	22.9834
rs627839	1	180808704	RNASEL	A	C	REC	750	1.022	0.979	0.1873	0.7077	1.475	0.6782	1.413	0.1136	0.9096	306.535
rs11072	1	180809954	RNASEL	C	T	REC	748	0.9725	1.028	0.271	0.5718	1.654	0.6046	1.749	-0.103	0.9179	309.332
rs672527	1	180811844	RNASEL	A	G	REC	751	1.146	0.8725	0.282	0.6594	1.992	0.502	1.516	0.4836	0.6287	211.872
rs533259	1	180815642	RNASEL	T	C	REC	749	1400000000	7.141e-10	1.211	0	1.#IO	0	1.#IO	0.001739	0.9986	336.528
rs627928	1	180817960	RNASEL	T	G	REC	753	0.7461	1.34	0.1854	0.5188	1.073	0.9318	1.928	-1.579	0.1143	38.5191
rs486907	1	180821180	RNASEL	T	C	REC	753	1.263	0.792	0.2358	0.7954	2.004	0.499	1.257	0.989	0.3227	108.75
rs3024498	1	205008152	IL10	C	T	REC	747	1.273	0.7857	0.3226	0.6764	2.395	0.4175	1.479	0.7478	0.4546	153.2
rs3024496	1	205008487	IL10	C	T	REC	749	0.9855	1.015	0.1843	0.6867	1.414	0.7071	1.456	-0.07922	0.9369	315.735
rs3024509	1	205009920	IL10	C	T	REC	750	1185000000	8.437e-10	2.438	0	1.#IO	0	1.#IO	0.000857	0.9993	336.764
rs3021094	1	205011575	IL10	G	T	REC	753	1.073	0.932	0.9198	0.1769	6.508	0.1536	5.654	0.07653	0.939	316.443
rs1800871	1	205013257	IL10	T	C	REC	749	0.7776	1.286	0.3019	0.4303	1.405	0.7117	2.324	-0.8332	0.4047	136.384
rs1800896	1	205013520	IL10	C	T	REC	751	1.029	0.9718	0.1847	0.7165	1.478	0.6766	1.396	0.155	0.8768	295.482
rs3770768	2	37199655	EIF2AK2	T	C	REC	751	0.7383	1.354	0.4679	0.2951	1.847	0.5414	3.388	-0.6484	0.5167	174.128
rs4648212	2	37206515	EIF2AK2	T	C	REC	749	1022000000	9.782e-10	1.723	0	1.#IO	0	1.#IO	0.001204	0.999	336.663
rs4670185	2	37209038	EIF2AK2	G	A	REC	752	3.856	0.2594	1.126	0.4239	35.07	0.02851	2.359	1.198	0.2309	77.8133
rs4648186	2	37220611	EIF2AK2	T	C	REC	750	1.43	0.6992	0.4849	0.5529	3.699	0.2703	1.809	0.7379	0.4606	155.222
rs4648184	2	37220999	EIF2AK2	A	T	REC	753	NA	NA	NA	NA	NA	NA	NA	NA	NA	NA
rs2373114	2	37226754	EIF2AK2	A	G	REC	748	1051000000	9.519e-10	9170	0	1.#IO	0	1.#IO	0.002265	0.9982	336.393
rs2254958	2	37229795	EIF2AK2	T	C	REC	747	0.9713	1.03	0.2049	0.65	1.451	0.689	1.539	-0.1422	0.8869	298.885
rs12712526	2	37236819	EIF2AK2	G	A	REC	742	1.304	0.7667	0.1829	0.9114	1.867	0.5357	1.097	1.453	0.1463	49.3031
rs7340267	2	37237964	EIF2AK2	G	A	REC	740	1.305	0.7666	0.1821	0.9129	1.864	0.5364	1.095	1.46	0.1444	48.6628
rs1990760	2	162832297	IFIH1	G	A	REC	751	0.9795	1.021	0.2067	0.6532	1.469	0.6808	1.531	-0.1001	0.9202	310.107
rs3747517	2	162837070	IFIH1	T	C	REC	751	1.105	0.9046	0.2793	0.6395	1.911	0.5233	1.564	0.3591	0.7195	242.472
rs13023380	2	162862609	IFIH1	A	G	REC	748	1.381	0.7242	0.1714	0.9868	1.932	0.5175	1.013	1.882	0.05979	20.1492
rs17715343	2	162875992	IFIH1	G	C	REC	752	1227000000	8.15e-10	1.721	0	1.#IO	0	1.#IO	0.001216	0.999	336.663
rs2059691	2	179010130	PRKRA	A	G	REC	751	0.5178	1.931	0.2735	0.303	0.885	1.13	3.301	-2.407	0.01609	5.42233
rs2288320	2	179016748	PRKRA	C	A	REC	749	0.7195	1.39	0.4708	0.2859	1.81	0.5524	3.497	-0.6994	0.4843	163.209
rs3752689	2	179020859	PRKRA	G	A	REC	747	1.177	0.8499	0.3839	0.5544	2.497	0.4005	1.804	0.4236	0.6719	226.43
rs3771300	2	191543841	STAT1	G	T	REC	751	0.7894	1.267	0.1727	0.5627	1.107	0.903	1.777	-1.369	0.171	57.627
rs2066804	2	191550004	STAT1	T	C	REC	751	0.8673	1.153	0.3223	0.4612	1.631	0.6131	2.168	-0.4419	0.6586	221.948
rs12693591	2	191568747	STAT1	A	C	REC	753	0.774	1.292	0.4643	0.3115	1.923	0.52	3.21	-0.5517	0.5811	195.831
rs10173099	2	191575577	STAT1	A	G	REC	753	0.9996	1	0.231	0.6356	1.572	0.6362	1.573	-0.001765	0.9986	336.528
rs1879877	2	204278245	CD28	T	G	REC	750	0.9269	1.079	0.2771	0.5385	1.596	0.6267	1.857	-0.2738	0.7843	264.309
rs3181096	2	204278337	CD28	A	G	REC	721	1.15	0.8695	0.2121	0.7589	1.743	0.5738	1.318	0.6592	0.5098	171.803
rs3116494	2	204300266	CD28	G	A	REC	752	1.272	0.7863	0.3101	0.6926	2.335	0.4282	1.444	0.7752	0.4382	147.673
rs16840252	2	204439764	CTLA4	A	G	REC	751	0.9148	1.093	0.4378	0.3879	2.158	0.4635	2.578	-0.2033	0.8389	282.709
rs11571317	2	204440253	CTLA4	A	G	REC	753	0.5328	1.877	0.7752	0.1166	2.434	0.4108	8.576	-0.8123	0.4166	140.394
rs5742909	2	204440592	CTLA4	A	G	REC	749	0.6228	1.606	0.774	0.1366	2.839	0.3523	7.319	-0.6119	0.5406	182.182
rs41265961	2	204444106	CTLA4	A	G	REC	752	5.488e-10	1822000000	1.724	0	1.#IO	0	1.#IO	-0.001237	0.999	336.663
rs11883722	2	204509090	ICOS	A	G	REC	741	0.8502	1.176	0.3633	0.4172	1.733	0.5771	2.397	-0.4466	0.6552	220.802
rs4264550	2	204529739	ICOS	A	G	REC	751	0.8756	1.142	0.6793	0.2312	3.315	0.3016	4.325	-0.1956	0.8449	284.731
rs10183087	2	204532569	ICOS	C	A	REC	752	1.223	0.8178	0.3499	0.6158	2.428	0.4119	1.624	0.5746	0.5655	190.573
rs10932035	2	204532897	ICOS	A	G	REC	753	4.506	0.2219	1.088	0.5343	38	0.02632	1.871	1.384	0.1664	56.0768
rs6705653	2	242442232	PDCD1	T	C	REC	743	1.072	0.9332	0.1944	0.7321	1.569	0.6375	1.366	0.3559	0.7219	243.28
PDCD1_008885	2	242442870	PCDC1	C	G	REC	743	1074000000	9.309e-10	2.438	0	1.#IO	0	1.#IO	0.000853	0.9993	336.764
rs7419333	2	242443985	PDCD1	G	C	REC	742	1.422	0.7033	0.2495	0.8718	2.319	0.4313	1.147	1.41	0.1584	53.3808
rs4988457	3	38157140	MYD88	G	C	REC	749	0.5682	1.76	1.422	0.035	9.224	0.1084	28.57	-0.3975	0.691	232.867
rs7744	3	38159025	MYD88	G	A	REC	753	0.3805	2.628	0.5287	0.135	1.073	0.9323	7.408	-1.827	0.06764	22.7947
rs6853	3	38159374	MYD88	G	A	REC	753	1.613	0.6201	0.7009	0.4083	6.37	0.157	2.449	0.6818	0.4954	166.95
rs1799988	3	46387263	CCR5	A	G	REC	745	0.8988	1.113	0.1906	0.6186	1.306	0.7658	1.617	-0.56	0.5755	193.944
rs352140	3	52231737	TLR9	G	A	REC	750	1.027	0.9737	0.1751	0.7287	1.448	0.6908	1.372	0.1525	0.8788	296.156
rs187084	3	52236071	TLR9	C	T	REC	750	0.7936	1.26	0.1943	0.5423	1.161	0.8611	1.844	-1.19	0.234	78.858
rs17281703	3	120726239	CD80	A	G	REC	750	0.8943	1.118	0.5637	0.2962	2.7	0.3704	3.376	-0.1982	0.8429	284.057
rs1599796	3	120726624	CD80	A	G	REC	750	0.9389	1.065	0.3778	0.4478	1.969	0.5079	2.233	-0.1667	0.8676	292.381
rs7628626	3	120727111	CD80	A	C	REC	753	2.194	0.4558	0.4503	0.9077	5.303	0.1886	1.102	1.745	0.08098	27.2903
rs2629396	3	120731657	CD80	G	T	REC	752	1.107	0.9032	0.2015	0.746	1.643	0.6086	1.341	0.5053	0.6133	206.682
rs2228017	3	120746370	CD80	A	G	REC	752	1.078	0.9276	0.2705	0.6344	1.832	0.5458	1.576	0.278	0.781	263.197
rs9282638	3	120746460	CD80	C	T	REC	752	0.8026	1.246	0.4505	0.3319	1.941	0.5153	3.013	-0.4882	0.6254	210.76
rs16829980	3	120761158	CD80	G	A	REC	746	5.178	0.1931	1.076	0.6286	42.65	0.02344	1.591	1.528	0.1264	42.5968
rs16829984	3	120761230	CD80	C	G	REC	750	1.006	0.9944	0.5975	0.3118	3.243	0.3083	3.207	0.009325	0.9926	334.506
rs1880661	3	120761538	CD80	T	C	REC	752	1.407	0.7108	0.1843	0.9804	2.019	0.4953	1.02	1.852	0.06397	21.5579
CD80_035889	3	120795177	CD80	A	G	REC	750	0.4705	2.125	0.351	0.2365	0.9363	1.068	4.229	-2.148	0.03175	10.6997
rs2681417	3	123307887	CD86	G	A	REC	753	1116000000	8.962e-10	1.214	0	1.#IO	0	1.#IO	0.001716	0.9986	336.528
rs1129055	3	123321009	CD86	A	G	REC	751	1.686	0.593	0.3181	0.904	3.145	0.3179	1.106	1.643	0.1005	33.8685
rs17281995	3	123322331	CD86	G	C	REC	753	0.4481	2.232	0.6381	0.1283	1.565	0.6391	7.794	-1.258	0.2083	70.1971
rs2305619	3	158637555	PTX3	A	G	REC	747	1.185	0.8439	0.1776	0.8365	1.678	0.5958	1.195	0.9553	0.3394	114.378
rs3845978	3	158642388	PTX3	A	G	REC	751	5.312e-10	1883000000	2.438	0	1.#IO	0	1.#IO	-0.000876	0.9993	336.764
rs3911403	3	158644821	PTX3	T	A	REC	749	0.7973	1.254	0.7922	0.1688	3.767	0.2655	5.925	-0.2859	0.7749	261.141
rs3921	4	77161967	CXCL10	C	G	REC	749	1.043	0.9584	0.1891	0.7202	1.512	0.6615	1.388	0.2249	0.8221	277.048
rs4256246	4	77164546	CXCL10	A	G	REC	750	1.252	0.799	0.4939	0.4753	3.295	0.3035	2.104	0.4543	0.6496	218.915
rs230525	4	103677907	NFKB1	G	A	REC	751	1.38	0.7248	0.2553	0.8364	2.276	0.4394	1.196	1.26	0.2076	69.9612
rs4648050	4	103733779	NFKB1	G	A	REC	749	1.498	0.6674	0.2661	0.8895	2.524	0.3962	1.124	1.52	0.1286	43.3382
rs4648095	4	103746914	NFKB1	G	A	REC	752	1235000000	8.095e-10	2.438	0	1.#IO	0	1.#IO	0.0008587	0.9993	336.764
rs1049253	4	185785945	CASP3	C	T	REC	750	0.6978	1.433	0.3894	0.3253	1.497	0.668	3.074	-0.924	0.3555	119.803
rs2705897	4	185790092	CASP3	A	C	REC	750	1.146	0.873	0.295	0.6426	2.042	0.4897	1.556	0.4606	0.6451	217.399
rs2720376	4	185791294	CASP3	G	A	REC	751	0.8476	1.18	0.1846	0.5903	1.217	0.8216	1.694	-0.8958	0.3704	124.825
rs2705901	4	185796481	CASP3	G	C	REC	752	1.139	0.8778	0.4968	0.4302	3.017	0.3315	2.324	0.2623	0.7931	267.275
rs4647610	4	185804925	CASP3	T	C	REC	752	0.8923	1.121	0.5645	0.2951	2.698	0.3707	3.388	-0.2018	0.84	283.08
rs2720378	4	185805107	CASP3	C	G	REC	741	0.882	1.134	0.2666	0.523	1.487	0.6723	1.912	-0.4709	0.6377	214.905
rs4647603	4	185806724	CASP3	T	C	REC	730	2.683	0.3728	0.6652	0.7284	9.881	0.1012	1.373	1.484	0.1379	46.4723
rs3775296	4	187234761	TLR3	T	G	REC	753	2.048	0.4882	0.3867	0.96	4.371	0.2288	1.042	1.854	0.06368	21.4602
rs1879026	4	187237315	TLR3	T	G	REC	751	1.234	0.8101	0.4929	0.4698	3.244	0.3083	2.129	0.4273	0.6691	225.487
rs3775291	4	187241068	TLR3	T	C	REC	750	0.8565	1.168	0.2677	0.5068	1.448	0.6908	1.973	-0.5786	0.5629	189.697
rs3775290	4	187241211	TLR3	T	C	REC	753	1.263	0.792	0.2523	0.7701	2.07	0.483	1.299	0.9245	0.3552	119.702
rs2069187	5	54433806	GZMA	C	T	REC	752	0.5683	1.76	0.4558	0.2326	1.389	0.7201	4.299	-1.24	0.2151	72.4887
rs1051846	5	54439814	GZMA	C	G	REC	752	0.8467	1.181	0.8338	0.1652	4.34	0.2304	6.054	-0.1996	0.8418	283.687
rs839	5	131847025	IRF1	T	C	REC	702	2	0.5001	0.2619	1.197	3.341	0.2993	0.8355	2.646	0.008142	2.74385
rs2070729	5	131847820	IRF1	T	G	REC	745	1.714	0.5836	0.2022	1.153	2.547	0.3926	0.8674	2.663	0.007736	2.60703
rs17622656	5	131848896	IRF1	A	G	REC	746	0.9966	1.003	0.2234	0.6432	1.544	0.6477	1.555	-0.0154	0.9877	332.855
rs1800630	6	31650455	TNF	A	C	REC	747	2.258	0.4428	0.5267	0.8044	6.34	0.1577	1.243	1.547	0.122	41.114
rs3093662	6	31652168	TNF	G	A	REC	746	5.919e-10	1690000000	1.721	0	1.#IO	0	1.#IO	-0.001235	0.999	336.663
rs11914	6	137561281	IFNGR1	G	T	REC	750	1.389	0.7199	0.4853	0.5366	3.596	0.2781	1.863	0.6773	0.4982	167.893
rs3799488	6	137561473	IFNGR1	G	A	REC	751	0.4363	2.292	0.4973	0.1646	1.156	0.8648	6.075	-1.668	0.09532	32.1228
rs1327474	6	137582768	IFNGR1	C	T	REC	747	1.087	0.9196	0.1901	0.7493	1.578	0.6336	1.335	0.4412	0.6591	222.117
rs752637	7	128366656	IRF5	T	C	REC	748	0.9446	1.059	0.2094	0.6266	1.424	0.7023	1.596	-0.2723	0.7854	264.68
rs3807306	7	128367916	IRF5	T	G	REC	748	1.062	0.9413	0.1879	0.735	1.535	0.6513	1.36	0.3217	0.7477	251.975
rs1874328	7	128372340	IRF5	C	T	REC	750	1.243	0.8045	0.2336	0.7863	1.965	0.509	1.272	0.931	0.3519	118.59
rs10108662	8	39899146	INDO	A	C	REC	750	1.089	0.9182	0.2382	0.6828	1.737	0.5756	1.465	0.3584	0.7201	242.674
rs3739319	8	39904478	INDO	A	G	REC	752	1.453	0.6881	0.2113	0.9604	2.199	0.4548	1.041	1.769	0.0769	25.9153
rs268561	8	71656476	TRAM1	G	A	REC	751	0.9252	1.081	0.237	0.5815	1.472	0.6793	1.72	-0.328	0.7429	250.357
rs7011101	8	71664028	TRAM1	C	A	REC	751	0.7225	1.384	0.6445	0.2043	2.555	0.3914	4.895	-0.5044	0.614	206.918
rs3816745	8	71669188	TRAM1	C	G	REC	752	0.9383	1.066	0.2039	0.6292	1.399	0.7147	1.589	-0.3125	0.7547	254.334
rs17686100	8	71669566	TRAM1	G	A	REC	753	2.745	0.3643	1.125	0.3025	24.9	0.04016	3.305	0.8974	0.3695	124.522
rs268594	8	71675684	TRAM1	A	G	REC	748	1.204	0.8308	0.2806	0.6945	2.086	0.4793	1.44	0.6607	0.5088	171.466
rs268598	8	71677425	TRAM1	G	A	REC	751	2.71	0.369	1.163	0.2776	26.47	0.03778	3.603	0.8576	0.3911	131.801
rs268600	8	71680925	TRAM1	G	A	REC	718	1796000000	5.567e-10	2.438	0	1.#IO	0	1.#IO	0.0008741	0.9993	336.764
rs10429491	9	5040706	JAK2	A	G	REC	751	0.6537	1.53	0.2806	0.3772	1.133	0.8825	2.651	-1.515	0.1299	43.7763
rs2230724	9	5071780	JAK2	G	A	REC	750	1.04	0.962	0.176	0.7363	1.468	0.6814	1.358	0.2202	0.8257	278.261
rs12340866	9	5084185	JAK2	A	G	REC	749	0.5865	1.705	0.3073	0.3211	1.071	0.9335	3.114	-1.736	0.08254	27.816
rs3780378	9	5102288	JAK2	G	A	REC	748	1.128	0.8868	0.1808	0.7912	1.607	0.6222	1.264	0.6645	0.5064	170.657
rs3780379	9	5102519	JAK2	A	G	REC	747	1.287	0.7772	0.4213	0.5634	2.938	0.3403	1.775	0.5982	0.5497	185.249
rs10815160	9	5106616	JAK2	C	A	REC	750	2.129	0.4696	0.3306	1.114	4.071	0.2457	0.8978	2.286	0.02226	7.50162
rs822336	9	5438690	PDCD1L1	G	C	REC	750	1.03	0.9711	0.1885	0.7117	1.49	0.6711	1.405	0.1557	0.8762	295.279
rs12002985	9	5446587	PDCD1L1	G	C	REC	752	1.086	0.9208	0.1878	0.7516	1.569	0.6373	1.331	0.4392	0.6605	222.588
rs17804441	9	5447733	PDCD1L1	G	A	REC	751	1.116	0.8961	0.3182	0.5982	2.082	0.4803	1.672	0.3449	0.7302	246.077
rs2297137	9	5455732	PDCD1L1	T	C	REC	737	0.9353	1.069	0.3582	0.4635	1.887	0.5299	2.157	-0.1868	0.8519	287.09
PDCD1L1_017464	9	5456085	PDCD1L	G	A	REC	750	0.9408	1.063	0.3409	0.4823	1.835	0.5449	2.073	-0.1789	0.858	289.146
PDCD1L1_019180	9	5457801	PDCD1L1	A	G	REC	753	1036000000	9.653e-10	1.407	0	1.#IO	0	1.#IO	0.001476	0.9988	336.596
rs2297136	9	5457955	PDCD1L1	C	T	REC	751	1.423	0.7029	0.1801	0.9996	2.025	0.4938	1	1.958	0.05028	16.9444
rs4143815	9	5458257	PDCD1L1	C	G	REC	748	0.7842	1.275	0.2743	0.458	1.342	0.7449	2.183	-0.8864	0.3754	126.51
rs16923189	9	5500644	PDCD1LG2	G	A	REC	751	0.8104	1.234	0.2662	0.481	1.366	0.7323	2.079	-0.7895	0.4298	144.843
rs7854413	9	5547708	PDCD1LG2	G	A	REC	752	0.6369	1.57	0.5326	0.2243	1.809	0.5529	4.459	-0.8472	0.3969	133.755
rs7852996	9	5559860	PDCD1LG2	T	A	REC	750	0.6718	1.489	0.5739	0.2181	2.069	0.4834	4.584	-0.6933	0.4881	164.49
rs1051922	9	21067716	IFNB1	T	C	REC	751	1.117	0.8952	0.2504	0.6838	1.825	0.548	1.462	0.4422	0.6583	221.847
rs28383793	9	21430416	IFNA	G	A	REC	753	1100000000	9.093e-10	2.438	0	1.#IO	0	1.#IO	0.000854	0.9993	336.764
rs12685904	9	21431310	IFNA	C	A	REC	750	0.8279	1.208	1.423	0.05091	13.47	0.07426	19.64	-0.1327	0.8944	301.413
rs10985085	9	122705118	TRAF1	A	G	REC	752	1009000000	9.914e-10	2.438	0	1.#IO	0	1.#IO	0.0008504	0.9993	336.764
rs4836834	9	122705722	TRAF1	T	A	REC	753	1.131	0.8845	0.1923	0.7756	1.648	0.6068	1.289	0.6385	0.5232	176.318
rs2239657	9	122711341	TRAF1	G	A	REC	744	0.9486	1.054	0.217	0.62	1.451	0.689	1.613	-0.243	0.808	272.296
rs13440146	9	122721272	TRAF1	A	C	REC	742	1.129	0.8854	0.9212	0.1857	6.87	0.1456	5.386	0.1321	0.8949	301.581
rs10824792	10	54196212	MBL2	G	A	REC	750	1.132	0.8833	0.2047	0.7579	1.691	0.5913	1.319	0.6062	0.5444	183.463
rs11595876	10	54196768	MBL2	G	A	REC	753	1.31	0.7634	0.9194	0.2161	7.94	0.126	4.628	0.2936	0.7691	259.187
rs930507	10	54198272	MBL2	G	C	REC	750	0.6673	1.499	0.4319	0.2863	1.556	0.6428	3.493	-0.9366	0.349	117.613
rs1838066	10	54199331	MBL2	G	A	REC	752	1.106	0.9038	0.2199	0.719	1.703	0.5873	1.391	0.4601	0.6454	217.5
rs10824793	10	54199486	MBL2	G	A	REC	752	1.297	0.7708	0.1882	0.8972	1.876	0.533	1.115	1.384	0.1665	56.1105
rs4647964	10	54201105	MBL2	G	G	REC	718	NA	NA	NA	NA	NA	NA	NA	NA	NA	NA
rs1800450	10	54201241	MBL2	T	C	REC	753	0.8349	1.198	0.545	0.2869	2.43	0.4116	3.486	-0.3311	0.7406	249.582
rs1889490	10	72027719	PRF1	T	C	REC	749	0.7498	1.334	0.1979	0.5087	1.105	0.905	1.966	-1.455	0.1456	49.0672
rs35069510	10	72032901	PRF1	T	C	REC	747	0.1502	6.659	1.116	0.01684	1.339	0.7468	59.37	-1.698	0.08943	30.1379
rs1800682	10	90739943	FAS	C	T	REC	748	1.232	0.8115	0.1867	0.8548	1.777	0.5628	1.17	1.119	0.263	88.631
rs2234978	10	90761809	FAS	A	G	REC	749	0.8143	1.228	0.2688	0.4808	1.379	0.7251	2.08	-0.7642	0.4448	149.898
rs1051070	10	90764752	FAS	T	A	REC	746	2.352	0.4252	1.161	0.2417	22.89	0.04369	4.138	0.7367	0.4613	155.458
rs17468739	10	91055929	IFIT2	C	A	REC	749	0.5518	1.812	0.4528	0.2272	1.34	0.7461	4.401	-1.313	0.1892	63.7604
rs2070845	10	91056055	IFIT2	G	A	REC	751	0.8291	1.206	0.2949	0.4651	1.478	0.6766	2.15	-0.6354	0.5252	176.992
rs954439	10	91056440	IFIT2	T	A	REC	712	0.8083	1.237	0.185	0.5625	1.162	0.8609	1.778	-1.151	0.2499	84.2163
rs1727	10	91056749	IFIT2	C	A	REC	750	0.7913	1.264	0.2922	0.4463	1.403	0.7128	2.241	-0.8014	0.4229	142.517
rs303215	10	91146811	IFIT1	G	A	REC	752	1.262	0.7921	0.3651	0.6172	2.582	0.3872	1.62	0.6384	0.5232	176.318
rs11203109	10	91147139	IFIT1	G	A	REC	751	0.7656	1.306	0.2656	0.4549	1.288	0.7762	2.198	-1.006	0.3144	105.953
rs304485	10	91149890	IFIT1	A	T	REC	750	0.907	1.103	0.1821	0.6348	1.296	0.7717	1.575	-0.5364	0.5917	199.403
rs303212	10	91151335	IFIT1	G	A	REC	752	1.106	0.9039	0.2905	0.626	1.955	0.5114	1.597	0.3479	0.7279	245.302
rs303211	10	91152477	IFIT1	A	G	REC	752	1189000000	8.412e-10	2.438	0	1.#IO	0	1.#IO	0.0008572	0.9993	336.764
rs3809112	11	297036	IFITM2	G	A	REC	749	1.625	0.6154	0.2085	1.08	2.445	0.409	0.926	2.329	0.01987	6.69619
rs11246062	11	303755	IFITM1	G	C	REC	749	1.173	0.8529	0.2593	0.7053	1.949	0.513	1.418	0.6137	0.5394	181.778
rs3758650	11	606865	IRF7	A	G	REC	739	0.3741	2.673	1.235	0.03325	4.208	0.2376	30.07	-0.7963	0.4259	143.528
rs731909	11	2365200	CD81	C	G	REC	750	0.8013	1.248	0.4963	0.3029	2.12	0.4718	3.301	-0.4462	0.6554	220.87
rs800335	11	2367517	CD81	G	A	REC	745	0.6201	1.613	0.393	0.287	1.34	0.7465	3.484	-1.216	0.224	75.488
rs3740961	11	36466647	TRAF6	C	T	REC	751	1.254	0.7977	0.5268	0.4465	3.52	0.2841	2.24	0.4292	0.6678	225.049
rs331457	11	36480188	TRAF6	T	C	REC	749	0.1839	5.437	0.798	0.03849	0.8788	1.138	25.98	-2.122	0.03385	11.4074
rs5030419	11	36487319	TRAF6	G	C	REC	748	1286000000	7.776e-10	7339	0	1.#IO	0	1.#IO	0.002858	0.9977	336.225
rs7127254	11	46265125	CREB3L1	A	G	REC	752	1.363	0.7339	0.3461	0.6914	2.685	0.3724	1.446	0.8937	0.3715	125.195
rs11038852	11	46270467	CREB3L1	G	C	REC	750	1.329	0.7523	0.2736	0.7775	2.272	0.4401	1.286	1.04	0.2983	100.527
rs4625425	11	46289469	CREB3L1	C	A	REC	750	0.8069	1.239	0.4518	0.3328	1.956	0.5112	3.004	-0.4747	0.635	213.995
rs2288249	11	46290815	CREB3L1	A	G	REC	750	1577000000	6.341e-10	1.717	0	1.#IO	0	1.#IO	0.001234	0.999	336.663
rs4963271	11	63061760	RARRES3	G	A	REC	750	1.337	0.7479	0.4068	0.6024	2.968	0.337	1.66	0.7142	0.4751	160.109
rs1131715	11	69731135	FADD	G	A	REC	750	0.7437	1.345	0.1973	0.5052	1.095	0.9134	1.979	-1.501	0.1334	44.9558
rs7115875	11	75737878	PRKRIR	G	A	REC	745	0.2399	4.168	0.8273	0.04741	1.214	0.8237	21.09	-1.726	0.08444	28.4563
rs3824908	11	75754968	PRKRIR	C	A	REC	751	0.7635	1.31	0.3412	0.3911	1.49	0.671	2.557	-0.7909	0.429	144.573
rs7925910	11	75765047	PRKRIR	G	A	REC	749	0.7417	1.348	0.646	0.2091	2.631	0.3801	4.782	-0.4625	0.6437	216.927
rs4320976	11	75765492	PRKRIR	A	G	REC	752	0.563	1.776	0.4506	0.2328	1.361	0.7345	4.296	-1.275	0.2023	68.1751
rs4252249	11	117364419	IL10RA	A	G	REC	747	0.5562	1.798	0.6562	0.1537	2.013	0.4968	6.506	-0.8939	0.3714	125.162
rs2508450	11	117369039	IL10RA	A	G	REC	753	0.7444	1.343	0.1927	0.5103	1.086	0.9209	1.96	-1.532	0.1255	42.2935
rs3135932	11	117369273	IL10RA	G	A	REC	752	0.25	4	0.5285	0.08872	0.7044	1.42	11.27	-2.623	0.00872	2.93864
rs4252314	11	117373727	IL10RA	G	A	REC	752	NA	NA	NA	NA	NA	NA	NA	NA	NA	NA
rs2229113	11	117374880	IL10RA	A	G	REC	749	0.4498	2.223	0.2549	0.2729	0.7412	1.349	3.664	-3.135	0.00172	0.57964
rs9610	11	117377296	IL10RA	A	G	REC	753	0.9735	1.027	0.1976	0.6609	1.434	0.6974	1.513	-0.1357	0.892	300.604
rs8177352	11	125659053	TIRAP	G	A	REC	739	0.4055	2.466	0.3762	0.194	0.8475	1.18	5.155	-2.4	0.01641	5.53017
rs3802813	11	125667678	TIRAP	A	G	REC	751	NA	NA	NA	NA	NA	NA	NA	NA	NA	NA
rs3802814	11	125667817	TIRAP	A	G	REC	751	0.2469	4.049	0.4928	0.09399	0.6488	1.541	10.64	-2.838	0.004542	1.53065
rs8177375	11	125668274	TIRAP	G	A	REC	752	0.2873	3.48	0.8425	0.05512	1.498	0.6675	18.14	-1.48	0.1388	46.7756
rs8177376	11	125668822	TIRAP	C	A	REC	751	0.4629	2.161	0.3285	0.2431	0.8812	1.135	4.113	-2.345	0.01903	6.41311
rs625413	11	125669559	TIRAP	A	G	REC	752	1.497	0.6681	0.3517	0.7512	2.983	0.3353	1.331	1.147	0.2515	84.7555
rs1786704	11	125670967	TIRAP	G	A	REC	751	1.46	0.6851	0.3245	0.7728	2.757	0.3627	1.294	1.166	0.2438	82.1606
rs17199006	12	7775618	CLEC4C	G	A	REC	752	2.159	0.4631	0.5344	0.7575	6.155	0.1625	1.32	1.44	0.1498	50.4826
rs1894823	12	7781816	CLEC4C	A	G	REC	750	0.7121	1.404	0.3028	0.3934	1.289	0.7758	2.542	-1.121	0.2621	88.3277
rs10845821	12	7791451	CLEC4C	A	G	REC	751	1.402	0.7131	0.2179	0.9149	2.15	0.4652	1.093	1.552	0.1207	40.6759
rs4251460	12	42449035	IRAK4	C	A	REC	750	0.8579	1.166	0.5103	0.3155	2.332	0.4288	3.169	-0.3005	0.7638	257.401
rs4251513	12	42460471	IRAK4	G	C	REC	751	1.354	0.7388	0.1822	0.9471	1.934	0.517	1.056	1.662	0.09658	32.5475
rs4251580	12	42461033	IRAK4	A	G	REC	750	0.9558	1.046	0.6135	0.2872	3.181	0.3144	3.482	-0.07364	0.9413	317.218
rs4251520	12	42461605	IRAK4	G	A	REC	749	1.586	0.6303	0.6225	0.4684	5.374	0.1861	2.135	0.7414	0.4585	154.514
rs4251545	12	42466562	IRAK4	A	G	REC	749	0.7454	1.341	0.6207	0.2208	2.516	0.3974	4.528	-0.4733	0.636	214.332
rs1544410	12	46526102	VDR	T	C	REC	751	0.8439	1.185	0.1989	0.5715	1.246	0.8024	1.75	-0.8531	0.3936	132.643
rs2066807	12	55026949	STAT2	G	C	REC	752	1.106	0.9038	0.772	0.2437	5.024	0.199	4.104	0.131	0.8958	301.885
rs7316037	12	63133078	TBK1	A	G	REC	739	3.64	0.2747	1.09	0.4297	30.84	0.03243	2.327	1.185	0.2359	79.4983
rs11175398	12	63137245	TBK1	G	A	REC	747	0.8323	1.201	0.184	0.5803	1.194	0.8376	1.723	-0.9972	0.3187	107.402
rs10878175	12	63153605	TBK1	C	G	REC	748	2.246	0.4452	0.3222	1.194	4.223	0.2368	0.8373	2.511	0.01203	4.05411
rs7303577	12	63160369	TBK1	C	A	REC	753	0.7034	1.422	0.565	0.2324	2.129	0.4697	4.303	-0.6227	0.5335	179.79
rs2069727	12	66834490	IFNG	C	T	REC	748	1.079	0.9267	0.1894	0.7444	1.564	0.6393	1.343	0.4016	0.6879	231.822
rs2069718	12	66836429	IFNG	T	C	REC	752	1.062	0.9412	0.1909	0.7308	1.545	0.6474	1.368	0.3175	0.7508	253.02
rs2069716	12	66837082	IFNG	C	T	REC	750	1244000000	8.038e-10	2.438	0	1.#IO	0	1.#IO	0.000859	0.9993	336.764
rs1861494	12	66837676	IFNG	G	A	REC	749	0.928	1.078	0.2412	0.5784	1.489	0.6717	1.729	-0.31	0.7566	254.974
rs10744785	12	111829639	OAS1	G	C	REC	748	1.583	0.6318	0.3647	0.7745	3.235	0.3091	1.291	1.259	0.2079	70.0623
rs34137742	12	111833044	OAS1	A	G	REC	724	1.981	0.5047	0.4816	0.7708	5.092	0.1964	1.297	1.42	0.1557	52.4709
rs3741981	12	111833253	OAS1	G	A	REC	751	0.9783	1.022	0.2383	0.6132	1.561	0.6407	1.631	-0.09214	0.9266	312.264
OAS1_004547	12	111833482	OAS1	A	G	REC	744	5.448e-10	1836000000	1.719	0	1.#IO	0	1.#IO	-0.001241	0.999	336.663
rs10774671	12	111841576	OAS1	G	A	REC	751	1.102	0.9071	0.2924	0.6214	1.955	0.5114	1.609	0.3332	0.739	249.043
rs1859330	12	111860771	OAS3	C	T	REC	730	1.254	0.7972	0.2964	0.7017	2.242	0.446	1.425	0.7648	0.4444	149.763
rs7961861	12	111870301	OAS3	G	A	REC	741	0.9501	1.052	0.2538	0.5778	1.562	0.64	1.731	-0.2015	0.8403	283.181
rs2285933	12	111871162	OAS3	G	C	REC	752	1.308	0.7643	0.3134	0.7079	2.419	0.4135	1.413	0.8577	0.3911	131.801
rs2285932	12	111871333	OAS3	T	C	REC	750	0.8974	1.114	0.314	0.4849	1.661	0.6022	2.062	-0.3448	0.7303	246.111
rs2072136	12	111883302	OAS3	T	C	REC	753	0.7794	1.283	0.3344	0.4047	1.501	0.6663	2.471	-0.7455	0.456	153.672
OAS3_026920	12	111885590	OAS3	A	G	REC	744	2.14	0.4673	0.4903	0.8186	5.595	0.1787	1.222	1.552	0.1207	40.6759
OAS3_029396	12	111888066	OAS3	A	G	REC	735	1.196	0.8359	0.2667	0.7093	2.018	0.4957	1.41	0.6721	0.5015	169.005
rs2240188	12	111888067	OAS3	T	C	REC	734	1.042	0.9597	0.2952	0.5842	1.858	0.5381	1.712	0.1394	0.8891	299.627
rs2010549	12	111893380	OAS3	G	C	REC	748	0.826	1.211	0.371	0.3992	1.709	0.585	2.505	-0.5151	0.6065	204.391
rs2072133	12	111893643	OAS3	C	T	REC	751	0.7125	1.404	0.4365	0.3028	1.676	0.5965	3.302	-0.7765	0.4374	147.404
rs7138261	12	111894353	OAS3	A	G	REC	709	0.6563	1.524	1.431	0.03974	10.84	0.09225	25.17	-0.2943	0.7685	258.984
rs2072138	12	111909276	OAS2	C	G	REC	750	1.232	0.8118	0.3138	0.6659	2.279	0.4389	1.502	0.6644	0.5065	170.69
rs35992364	12	111917267	OAS2	G	A	REC	753	0.4341	2.303	0.4731	0.1718	1.097	0.9113	5.822	-1.764	0.07779	26.2152
rs1293755	12	111919833	OAS2	T	A	REC	750	0.5827	1.716	0.3243	0.3086	1.1	0.909	3.24	-1.666	0.09579	32.2812
rs2072137	12	111925304	OAS2	C	T	REC	751	1.123	0.8906	0.2341	0.7096	1.777	0.5629	1.409	0.4948	0.6207	209.176
rs929291	12	111928801	OAS2	T	C	REC	746	0.6803	1.47	0.3142	0.3675	1.259	0.7941	2.721	-1.226	0.2202	74.2074
rs916973	12	111931486	OAS2	C	T	REC	748	0.9835	1.017	0.6547	0.2726	3.549	0.2818	3.668	-0.02534	0.9798	330.193
rs15895	12	111932671	OAS2	T	C	REC	753	0.6717	1.489	0.2811	0.3872	1.165	0.858	2.583	-1.415	0.157	52.909
rs13311	12	111933035	OAS2	A	C	REC	751	1.17	0.8546	0.2517	0.7145	1.916	0.5219	1.4	0.6242	0.5325	179.452
rs1296371	12	111934088	OAS2	C	T	REC	730	0.8729	1.146	0.3528	0.4372	1.743	0.5737	2.287	-0.3852	0.7001	235.934
rs12819210	12	119942783	OASL	A	G	REC	753	1.636	0.6111	0.411	0.7311	3.662	0.2731	1.368	1.198	0.2309	77.8133
rs3213546	12	119955599	OASL	C	G	REC	752	NA	NA	NA	NA	NA	NA	NA	NA	NA	NA
rs3213545	12	119955720	OASL	T	C	REC	749	0.5381	1.858	0.3038	0.2967	0.9761	1.024	3.371	-2.04	0.04139	13.9484
rs10774580	12	119960806	OASL	A	G	REC	751	0.9202	1.087	0.21	0.6097	1.389	0.72	1.64	-0.3959	0.6921	233.238
rs28360475	12	119961429	OASL	G	A	REC	750	0.7937	1.26	0.3251	0.4197	1.501	0.6662	2.383	-0.7106	0.4773	160.85
rs2236350	14	23700850	ISGF3G	T	G	REC	748	2.844	0.3516	0.8115	0.5797	13.96	0.07165	1.725	1.288	0.1977	66.6249
rs12436555	14	23704665	ISGF3G	A	G	REC	748	0.7172	1.394	0.404	0.3249	1.583	0.6317	3.078	-0.823	0.4105	138.338
rs2236338	14	24170122	GZMB	G	A	REC	750	0.9453	1.058	0.3393	0.4861	1.838	0.5441	2.057	-0.1659	0.8682	292.583
rs11539752	14	24171429	GZMB	C	G	REC	749	0.6435	1.554	0.3578	0.3191	1.298	0.7707	3.134	-1.232	0.218	73.466
rs2273844	14	24173254	GZMB	A	G	REC	752	0.694	1.441	0.3421	0.3549	1.357	0.737	2.817	-1.068	0.2856	96.2472
rs28489163	14	93645984	IFI27	A	G	REC	751	6.92	0.1445	1.059	0.8683	55.15	0.01813	1.152	1.827	0.06776	22.8351
IFI27_000630	14	93646335	IFI27	G	C	REC	752	0.7866	1.271	0.3172	0.4224	1.465	0.6827	2.367	-0.7567	0.4492	151.38
rs3814821	14	93646690	IFI27	T	C	REC	753	0.752	1.33	0.1744	0.5343	1.058	0.9448	1.872	-1.634	0.1022	34.4414
rs2799	14	93652679	IFI27	C	G	REC	741	0.4498	2.223	0.9227	0.07372	2.745	0.3644	13.56	-0.8658	0.3866	130.284
IFI27_007273	14	93652978	IFI27	0	C	REC	752	NA	NA	NA	NA	NA	NA	NA	NA	NA	NA
rs1243081	14	93653215	IFI27	A	G	REC	712	0.8144	1.228	0.7204	0.1984	3.342	0.2992	5.039	-0.2851	0.7756	261.377
rs7141881	14	93653617	IFI27	A	G	REC	750	1.157	0.8642	0.2295	0.738	1.815	0.5511	1.355	0.6362	0.5247	176.824
rs1243082	14	93653748	IFI27	A	C	REC	751	1410000000	7.093e-10	1.215	0	1.#IO	0	1.#IO	0.001734	0.9986	336.528
rs10132928	14	93654162	IFI27	G	A	REC	751	1.25	0.7998	0.1804	0.8779	1.781	0.5616	1.139	1.238	0.2157	72.6909
rs4780355	16	11255359	SOCS1	G	A	REC	736	1.192	0.8387	0.2565	0.7212	1.971	0.5073	1.387	0.6856	0.4929	166.107
rs243330	16	11258492	SOCS1	T	C	REC	735	1.236	0.8092	0.1818	0.8653	1.765	0.5667	1.156	1.164	0.2443	82.3291
rs3760396	17	29605554	CCL2	G	C	REC	753	0.9645	1.037	0.3372	0.4981	1.868	0.5354	2.008	-0.1073	0.9145	308.186
rs2857656	17	29606120	CCL2	G	C	REC	748	1.265	0.7902	0.2934	0.7121	2.249	0.4447	1.404	0.8025	0.4223	142.315
rs4586	17	29607382	CCL2	G	A	REC	751	1.677	0.5962	0.2369	1.054	2.669	0.3747	0.9486	2.183	0.02905	9.78985
rs4969168	17	73865388	SOCS3	A	G	REC	747	0.5576	1.793	0.3762	0.2668	1.166	0.858	3.749	-1.553	0.1205	40.6085
rs2292151	19	4767719	TICAM1	T	C	REC	748	1.3	0.7691	0.3193	0.6953	2.431	0.4113	1.438	0.822	0.4111	138.541
rs7255265	19	4769378	TICAM1	A	G	REC	751	1.155	0.8657	0.2174	0.7544	1.769	0.5654	1.326	0.6633	0.5072	170.926
rs12609318	19	6614916	TNFSF14	A	G	REC	747	1.69	0.5918	0.3171	0.9075	3.146	0.3179	1.102	1.654	0.09811	33.0631
rs1077667	19	6619972	TNFSF14	T	C	REC	752	0.8939	1.119	0.4201	0.3924	2.036	0.4911	2.548	-0.2669	0.7895	266.061
rs8106574	19	6622142	TNFSF14	A	G	REC	744	1.043	0.9585	0.3401	0.5357	2.032	0.4921	1.867	0.1247	0.9008	303.57
rs8112310	19	7710320	CD209	A	T	REC	752	2.165	0.4619	0.5865	0.6858	6.833	0.1463	1.458	1.317	0.1879	63.3223
rs4804801	19	7713482	CD209	T	A	REC	716	9.137	0.1094	1.046	1.176	70.98	0.01409	0.8502	2.115	0.03442	11.5995
rs4804802	19	7713610	CD209	A	G	REC	752	0.2151	4.649	1.176	0.02145	2.157	0.4636	46.62	-1.306	0.1914	64.5018
rs8105572	19	7715327	CD209	A	G	REC	747	0.9297	1.076	0.9398	0.1474	5.866	0.1705	6.786	-0.07753	0.9382	316.173
rs11465384	19	7716006	CD209	T	C	REC	750	3.164e-10	3160000000	2.438	0	1.#IO	0	1.#IO	-0.0008973	0.9993	336.764
rs2287886	19	7718536	CD209	A	G	REC	749	1.137	0.8797	0.233	0.72	1.795	0.5572	1.389	0.55	0.5823	196.235
rs735240	19	7719336	CD209	A	G	REC	750	1.115	0.8965	0.1816	0.7814	1.592	0.628	1.28	0.6019	0.5473	184.44
rs7252764	19	7733137	CLEC4M	A	G	REC	749	4.456e-10	2244000000	2.438	0	1.#IO	0	1.#IO	-0.0008832	0.9993	336.764
rs2287887	19	7733955	CLEC4M	C	A	REC	749	1.433	0.6981	0.3037	0.7899	2.598	0.3849	1.266	1.183	0.2367	79.7679
rs868876	19	7737226	CLEC4M	A	T	REC	750	1.129	0.8857	0.2744	0.6594	1.933	0.5173	1.517	0.4422	0.6583	221.847
rs475896	19	7737429	CLEC4M	C	G	REC	752	0.9586	1.043	0.1994	0.6485	1.417	0.7058	1.542	-0.2123	0.8319	280.35
rs558705	19	7738183	CLEC4M	T	C	REC	747	0.8295	1.206	1.01	0.1145	6.007	0.1665	8.73	-0.1851	0.8532	287.528
rs557094	19	7738286	CLEC4M	G	C	REC	749	1.147	0.8716	0.6551	0.3177	4.143	0.2414	3.148	0.2097	0.8339	281.024
rs2161525	19	7738664	CLEC4M	G	A	REC	747	1.132	0.8836	0.2081	0.7527	1.702	0.5876	1.329	0.5947	0.552	186.024
rs8113469	19	7738959	CLEC4M	G	A	REC	745	1.175	0.8513	0.3302	0.6149	2.244	0.4456	1.626	0.4874	0.626	210.962
rs12610506	19	7739071	CLEC4M	A	G	REC	751	0.9481	1.055	0.233	0.6005	1.497	0.668	1.665	-0.2288	0.819	276.003
rs3745376	19	7739690	CLEC4M	A	C	REC	750	1.835	0.545	0.4352	0.7819	4.305	0.2323	1.279	1.395	0.1631	54.9647
rs15282	19	7740274	CLEC4M	T	C	REC	752	1.923	0.52	0.2741	1.124	3.291	0.3038	0.8899	2.385	0.01707	5.75259
rs2304207	19	54859538	IRF3	C	G	REC	750	0.7227	1.384	0.4287	0.3119	1.674	0.5972	3.206	-0.7577	0.4487	151.212
rs2304204	19	54860832	IRF3	C	T	REC	751	0.586	1.706	0.2651	0.3486	0.9853	1.015	2.869	-2.016	0.0438	14.7606
rs752118	20	44180145	CD40	A	G	REC	749	1.126	0.8883	0.3566	0.5597	2.265	0.4416	1.787	0.3323	0.7397	249.279
rs745307	20	44180493	CD40	T	C	REC	745	1.874	0.5336	0.3319	0.9779	3.592	0.2784	1.023	1.893	0.05839	19.6774
rs3765457	20	44190620	CD40	G	A	REC	751	2.07	0.4831	0.4449	0.8656	4.951	0.202	1.155	1.636	0.1019	34.3403
rs3765459	20	44190814	CD40	A	G	REC	747	1.115	0.897	0.371	0.5388	2.307	0.4335	1.856	0.2931	0.7695	259.322
rs11569345	20	44191928	CD40	A	G	REC	752	4.487e-10	2229000000	2.438	0	1.#IO	0	1.#IO	-0.0008829	0.9993	336.764
rs11569348	20	44192680	CD40	A	C	REC	748	1.818	0.55	0.4846	0.7033	4.701	0.2127	1.422	1.234	0.2173	73.2301
rs2226299	21	33620794	IFNAR1	A	G	REC	745	1.228	0.8146	0.4124	0.5471	2.755	0.363	1.828	0.4974	0.6189	208.569
rs2252930	21	33626071	IFNAR1	C	G	REC	752	1.41	0.7093	0.267	0.8354	2.379	0.4203	1.197	1.286	0.1983	66.8271
rs2252931	21	33626190	IFNAR1	A	G	REC	752	1.451	0.6893	0.2662	0.8611	2.444	0.4091	1.161	1.398	0.1621	54.6277
rs17643419	21	33633668	IFNAR1	A	G	REC	752	0.3032	3.298	1.162	0.0311	2.957	0.3382	32.15	-1.027	0.3044	102.583
rs2253923	21	33634289	IFNAR1	A	T	REC	753	0.7338	1.363	0.2078	0.4883	1.103	0.907	2.048	-1.49	0.1362	45.8994
rs2257167	21	33637569	IFNAR1	G	C	REC	750	0.8186	1.222	0.6179	0.2438	2.748	0.3639	4.101	-0.3239	0.746	251.402
rs12483293	21	33638659	IFNAR1	C	A	REC	751	1.295	0.7725	0.2575	0.7815	2.144	0.4663	1.28	1.002	0.3161	106.526
rs2243600	21	33645531	IFNAR1	A	C	REC	752	1.441	0.6938	0.3036	0.795	2.613	0.3826	1.258	1.204	0.2284	76.9708
rs2834202	21	33652824	IFNAR1	G	A	REC	748	0.9934	1.007	0.3119	0.5391	1.831	0.5463	1.855	-0.02121	0.9831	331.305
rs9808753	21	33709182	IFNGR2	G	A	REC	751	0.5556	1.8	0.6791	0.1468	2.103	0.4755	6.812	-0.8653	0.3868	130.352
rs11910627	21	33721220	IFNGR2	G	C	REC	751	1.154	0.8665	0.2714	0.6779	1.965	0.509	1.475	0.5278	0.5976	201.391
rs1059293	21	33731563	IFNGR2	A	G	REC	753	1.079	0.9266	0.1755	0.765	1.522	0.6569	1.307	0.4342	0.6641	223.802
rs2071430	21	41719935	MX1	0	C	REC	741	NA	NA	NA	NA	NA	NA	NA	NA	NA	NA
rs7280422	21	41723437	MX1	C	G	REC	747	0.188	5.32	0.4071	0.08463	0.4175	2.395	11.82	-4.105	4.036e-05	0.0136013
rs455599	21	41726549	MX1	G	A	REC	752	1.198	0.835	0.2366	0.7533	1.904	0.5252	1.328	0.7625	0.4458	150.235
rs457347	21	41726740	MX1	G	A	REC	749	1.169	0.8557	0.2372	0.7341	1.86	0.5376	1.362	0.6567	0.5114	172.342
rs468672	21	41728034	MX1	A	T	REC	737	0.672	1.488	0.2771	0.3904	1.157	0.8644	2.562	-1.434	0.1515	51.0555
rs2838036	21	41729610	MX1	A	T	REC	751	NA	NA	NA	NA	NA	NA	NA	NA	NA	NA
rs8132871	21	41732690	MX1	A	G	REC	748	0.2241	4.463	0.4917	0.08548	0.5874	1.702	11.7	-3.042	0.002351	0.792287
rs467558	21	41733265	MX1	G	A	REC	746	0.7995	1.251	0.3058	0.439	1.456	0.6869	2.278	-0.7318	0.4643	156.469
rs467960	21	41734761	MX1	G	A	REC	753	0.6035	1.657	0.2701	0.3554	1.025	0.9761	2.813	-1.87	0.06145	20.7086
rs469390	21	41739800	MX1	G	A	REC	753	0.7687	1.301	0.2698	0.4531	1.304	0.7667	2.207	-0.9751	0.3295	111.041
rs7277299	21	41740660	MX1	A	C	REC	752	0.5009	1.996	0.7478	0.1157	2.169	0.461	8.645	-0.9244	0.3553	119.736
rs467639	21	41741434	MX1	A	T	REC	749	1.078	0.9276	0.3331	0.5612	2.071	0.4829	1.782	0.2256	0.8215	276.846
rs2070229	21	41742983	MX1	G	A	REC	751	0.8189	1.221	0.34	0.4206	1.595	0.6272	2.377	-0.5875	0.5568	187.642
rs469218	21	41743564	MX1	A	G	REC	698	1.093	0.9147	0.7493	0.2517	4.749	0.2106	3.973	0.119	0.9053	305.086
rs3737399	21	41745242	MX1	A	G	REC	747	1.024	0.9767	0.2653	0.6087	1.722	0.5807	1.643	0.08877	0.9293	313.174
rs1050008	21	41746531	MX1	G	A	REC	752	0.2056	4.863	0.5043	0.07653	0.5525	1.81	13.07	-3.136	0.001711	0.576607
rs467593	21	41748421	MX1	G	A	REC	748	0.9567	1.045	0.3247	0.5063	1.808	0.5531	1.975	-0.1363	0.8916	300.469
rs468811	21	41751716	MX1	A	G	REC	752	0.1889	5.294	0.4714	0.07498	0.4759	2.101	13.34	-3.535	0.0004079	0.137462
rs13433394	21	41753780	MX1	A	G	REC	751	1.61	0.6212	0.504	0.5994	4.323	0.2313	1.668	0.9444	0.3449	116.231
rs4819387	21	44471630	B7H2	A	G	REC	753	1.045	0.9568	0.1885	0.7223	1.512	0.6613	1.384	0.2341	0.8149	274.621
rs4819388	21	44471849	B7H2	A	G	REC	749	1.054	0.9485	0.285	0.603	1.843	0.5425	1.658	0.1854	0.8529	287.427
rs11558819	21	44481202	B7H2	T	C	REC	750	0.6684	1.496	0.2973	0.3732	1.197	0.8353	2.679	-1.355	0.1755	59.1435
rs378299	21	44485771	B7H2	C	T	REC	740	1.093	0.9148	0.1965	0.7437	1.607	0.6224	1.345	0.4531	0.6505	219.218
Legend
SNP	Single Nucleotide Polymorphisms
CHR	Chromosome
Position	Genomic Position
Gene	HUGO gene name
Minor Allele	Minor allele according to the frequency reported for this dataset
Major Allele	Major allele according to the frequency reported for this dataset
TEST	Association test performed
n	Number of individuals included in the analysis
OR Minor Allele	Odds ratio using the minor allele
OR Major Allele	Odds ratio using the major allele
SE	Standard Error
L95 Minor Allele	Lower 95% Confidence Interval for the odds ratio calculated for the minor allele
U95 Minor Allele	Upper 95% Confidence Interval for the odds ratio calculated for the minor allele
L95 Major Allele	Lower 95% Confidence Interval for the odds ratio calculated for the major allele
U95 Major Allele	Upper 95% Confidence Interval for the odds ratio calculated for the major allele
STAT	Coefficient t-statistic
P-value	Asymptotic p-value for t-statistic
Bonferroni p-value	Bonferroni corrected p-value
