# Supplementary material for: Host Genetic Risk Factors for West Nile Virus Infection and Disease Progression
Source: PLoS One. 2011 Sep 15;6(9):e24745. doi: 10.1371/journal.pone.0024745 (PMC3174177; doi:10.1371/journal.pone.0024745)
Supplement: Table S11 — WNE/P vs. WNF/M contingency table analysis using a recessive model of inheritance. (XLS) [file pone.0024745.s011.xls]

## Sheet: Sheet1
Table S11. WNE/P vs. WNF/M contingency table analysis using a recessive model of inheritance. Genotypic frequency differences between WNE/P and WNF/M infection were calculated a using 2 x 2 contingency table analysis and are summarized as odds ratios. Two sided p-values were estimated by the chi-sqaure test of significance with 1 degree of freedom. P-values were corrected for multiple tests using…
SNP	CHR		Gene	D (minor allele)	d (major allele)	TEST	WNE/P		WNF/M + Asymptomatic		n	CHISQ	DF	P-value	Bonferroni P-Value	OR Minor Allele	OR Major Allele
		Position					DD	Dd/dd	DD	Dd/dd
rs2254002	1	65074257	JAK1	T	G	REC	17	122	96	514	749	1.087	1	0.2971	100.123	0.746072	1.34035
rs4916004	1	65076098	JAK1	A	G	REC	2	138	5	603	748	0.4511	1	0.5018	169.107	1.74783	0.572139
rs310244	1	65078465	JAK1	T	C	REC	3	136	27	582	748	1.522	1	0.2174	73.2638	0.47549	2.10309
rs310247	1	65079997	JAK1	T	C	REC	26	113	128	481	748	0.3703	1	0.5428	182.924	0.864629	1.15656
rs2230587	1	65083850	JAK1	T	C	REC	5	135	10	600	750	2.169	1	0.1408	47.4496	2.22222	0.45
rs10789166	1	65085401	JAK1	G	A	REC	4	135	21	590	750	0.1099	1	0.7402	249.447	0.832451	1.20127
rs310219	1	65087886	JAK1	T	C	REC	8	132	43	564	747	0.3355	1	0.5624	189.529	0.794926	1.25798
rs188698	1	65091172	JAK1	C	T	REC	15	125	61	549	750	0.0638	1	0.8006	269.802	1.08	0.925926
rs2256298	1	65103270	JAK1	T	C	REC	14	126	34	569	743	3.577	1	0.05859	19.7448	1.85948	0.537786
rs11585932	1	65107683	JAK1	G	A	REC	0	139	3	601	743	NA	NA	NA	NA	NA	NA
rs12135754	1	65115093	JAK1	C	A	REC	1	139	6	604	750	0.08932	1	0.765	257.805	0.724221	1.38079
rs310201	1	65122196	JAK1	C	T	REC	8	132	40	570	750	0.1351	1	0.7132	240.348	0.863636	1.15789
rs310199	1	65122710	JAK1	C	T	REC	12	128	64	546	750	0.4611	1	0.4971	167.523	0.799805	1.25031
rs310198	1	65123656	JAK1	A	G	REC	2	138	11	597	748	0.09654	1	0.756	254.772	0.786561	1.27136
rs10802189	1	116858253	CD58	A	G	REC	19	121	68	538	746	0.6098	1	0.4349	146.561	1.24234	0.804931
rs17036001	1	116916652	CD58	A	G	REC	0	138	1	604	743	NA	NA	NA	NA	NA	NA
rs1335531	1	116916900	CD58	G	C	REC	10	129	35	570	744	0.395	1	0.5297	178.509	1.26246	0.792105
rs6701046	1	117099257	CD2	G	A	REC	8	132	27	579	746	0.403	1	0.5255	177.093	1.29966	0.76943
rs3136705	1	117104923	CD2	A	G	REC	3	136	12	599	750	0.02181	1	0.8826	297.436	1.1011	0.90818
rs798043	1	117105020	CD2	T	C	REC	6	134	32	578	750	0.2183	1	0.6404	215.815	0.808769	1.23645
rs1801274	1	159746369	FCGR2A	T	C	REC	38	101	160	451	750	0.07728	1	0.781	263.197	1.06052	0.942934
rs627839	1	180808704	RNASEL	A	C	REC	35	103	120	490	748	2.218	1	0.1364	45.9668	1.38754	0.7207
rs11072	1	180809954	RNASEL	C	T	REC	9	129	58	550	746	1.253	1	0.263	88.631	0.661588	1.51152
rs672527	1	180811844	RNASEL	A	G	REC	15	125	43	566	749	2.127	1	0.1447	48.7639	1.57953	0.633098
rs533259	1	180815642	RNASEL	T	C	REC	2	137	2	606	747	2.617	1	0.1057	35.6209	4.42336	0.226073
rs627928	1	180817960	RNASEL	T	G	REC	26	114	141	470	751	1.337	1	0.2475	83.4075	0.760234	1.31538
rs486907	1	180821180	RNASEL	T	C	REC	18	122	71	540	751	0.1668	1	0.683	230.171	1.12214	0.891152
rs3024498	1	205008152	IL10	C	T	REC	5	132	40	568	745	1.69	1	0.1935	65.2095	0.537879	1.85915
rs3024496	1	205008487	IL10	C	T	REC	30	110	147	460	747	0.4894	1	0.4842	163.175	0.853432	1.17174
rs3024509	1	205009920	IL10	C	T	REC	1	139	0	608	748	NA	NA	NA	NA	NA	NA
rs3021094	1	205011575	IL10	G	T	REC	1	139	4	607	751	0.006122	1	0.9376	315.971	1.09173	0.91598
rs1800871	1	205013257	IL10	T	C	REC	9	130	40	568	747	0.002001	1	0.9643	324.969	0.983077	1.01721
rs1800896	1	205013520	IL10	C	T	REC	30	110	148	461	749	0.5188	1	0.4713	158.828	0.849509	1.17715
rs3770768	2	37199655	EIF2AK2	T	C	REC	1	139	18	591	749	2.313	1	0.1283	43.2371	0.236211	4.2335
rs4648212	2	37206515	EIF2AK2	T	C	REC	0	139	2	606	747	NA	NA	NA	NA	NA	NA
rs4670185	2	37209038	EIF2AK2	G	A	REC	1	139	4	606	750	0.005894	1	0.9388	316.376	1.08993	0.917492
rs4648186	2	37220611	EIF2AK2	T	C	REC	2	137	17	592	748	0.8364	1	0.3604	121.455	0.508373	1.96706
rs4648184	2	37220999	EIF2AK2	A	T	REC	0	140	0	611	751	NA	NA	NA	NA	NA	NA
rs2373114	2	37226754	EIF2AK2	A	G	REC	2	138	5	601	746	0.4456	1	0.5044	169.983	1.74203	0.574043
rs2254958	2	37229795	EIF2AK2	T	C	REC	28	112	91	514	745	2.083	1	0.149	50.213	1.41209	0.708171
rs12712526	2	37236819	EIF2AK2	G	A	REC	38	97	129	476	740	2.943	1	0.08626	29.0696	1.44554	0.691785
rs7340267	2	37237964	EIF2AK2	G	A	REC	38	95	130	475	738	3.112	1	0.07773	26.195	1.46154	0.684211
rs1990760	2	162832297	IFIH1	G	A	REC	19	120	101	509	749	0.7019	1	0.4021	135.508	0.797937	1.25323
rs3747517	2	162837070	IFIH1	T	C	REC	8	131	50	560	749	0.9444	1	0.3311	111.581	0.683969	1.46205
rs13023380	2	162862609	IFIH1	A	G	REC	47	92	150	457	746	4.821	1	0.02812	9.47644	1.55645	0.642488
rs17715343	2	162875992	IFIH1	G	C	REC	0	140	2	608	750	NA	NA	NA	NA	NA	NA
rs2059691	2	179010130	PRKRA	A	G	REC	9	131	52	557	749	0.6775	1	0.4105	138.338	0.735907	1.35887
rs2288320	2	179016748	PRKRA	C	A	REC	2	137	17	591	747	0.8407	1	0.3592	121.05	0.507514	1.97039
rs3752689	2	179020859	PRKRA	G	A	REC	8	131	22	584	745	1.321	1	0.2504	84.3848	1.6211	0.616866
rs3771300	2	191543841	STAT1	G	T	REC	30	110	162	447	749	1.598	1	0.2062	69.4894	0.752525	1.32886
rs2066804	2	191550004	STAT1	T	C	REC	3	137	39	570	749	3.905	1	0.04815	16.2265	0.320045	3.12456
rs12693591	2	191568747	STAT1	A	C	REC	7	133	13	598	751	3.625	1	0.05691	19.1787	2.42105	0.413043
rs10173099	2	191575577	STAT1	A	G	REC	21	119	68	543	751	1.634	1	0.2012	67.8044	1.40917	0.709638
rs1879877	2	204278245	CD28	T	G	REC	11	128	49	560	748	0.002685	1	0.9587	323.082	0.982143	1.01818
rs3181096	2	204278337	CD28	A	G	REC	28	100	83	508	719	4.942	1	0.02621	8.83277	1.71373	0.583521
rs3116494	2	204300266	CD28	G	A	REC	9	131	39	571	750	0.0002346	1	0.9878	332.889	1.00587	0.994162
rs16840252	2	204439764	CTLA4	A	G	REC	3	137	19	590	749	0.3811	1	0.537	180.969	0.679985	1.47062
rs11571317	2	204440253	CTLA4	A	G	REC	1	139	6	605	751	0.0884	1	0.7662	258.209	0.72542	1.37851
rs5742909	2	204440592	CTLA4	A	G	REC	2	137	5	603	747	0.4632	1	0.4961	167.186	1.76058	0.567993
rs41265961	2	204444106	CTLA4	A	G	REC	0	140	2	608	750	NA	NA	NA	NA	NA	NA
rs11883722	2	204509090	ICOS	A	G	REC	9	129	25	576	739	1.427	1	0.2323	78.2851	1.60744	0.622106
rs4264550	2	204529739	ICOS	A	G	REC	1	138	8	602	749	0.3342	1	0.5632	189.798	0.54529	1.83389
rs10183087	2	204532569	ICOS	C	A	REC	5	135	32	578	750	0.6807	1	0.4093	137.934	0.668981	1.49481
rs10932035	2	204532897	ICOS	A	G	REC	2	138	5	606	751	0.4593	1	0.4979	167.792	1.75652	0.569307
rs6705653	2	242442232	PDCD1	T	C	REC	22	114	113	492	741	0.4662	1	0.4947	166.714	0.840242	1.19013
PDCD1_008885	2	242442870	PCDC1	C	G	REC	0	139	1	601	741	NA	NA	NA	NA	NA	NA
rs7419333	2	242443985	PDCD1	G	C	REC	15	120	63	542	740	0.05701	1	0.8113	273.408	1.0754	0.929889
rs4988457	3	38157140	MYD88	G	C	REC	0	140	2	605	747	NA	NA	NA	NA	NA	NA
rs7744	3	38159025	MYD88	G	A	REC	0	140	19	592	751	NA	NA	NA	NA	NA	NA
rs6853	3	38159374	MYD88	G	A	REC	4	136	6	605	751	3.048	1	0.08082	27.2363	2.96569	0.33719
rs1799988	3	46387263	CCR5	A	G	REC	25	111	114	493	743	0.0116	1	0.9142	308.085	0.974	1.02669
rs352140	3	52231737	TLR9	G	A	REC	33	106	146	463	748	0.003367	1	0.9537	321.397	0.987271	1.01289
rs187084	3	52236071	TLR9	C	T	REC	16	123	119	490	748	4.933	1	0.02635	8.87995	0.535629	1.86696
rs17281703	3	120726239	CD80	A	G	REC	2	138	11	597	748	0.09654	1	0.756	254.772	0.786561	1.27136
rs1599796	3	120726624	CD80	A	G	REC	7	133	23	585	748	0.4379	1	0.5082	171.263	1.33867	0.747009
rs7628626	3	120727111	CD80	A	C	REC	7	133	19	592	751	1.218	1	0.2698	90.9226	1.63989	0.609797
rs2629396	3	120731657	CD80	G	T	REC	31	109	94	516	750	3.717	1	0.05387	18.1542	1.56119	0.640535
rs2228017	3	120746370	CD80	A	G	REC	18	122	44	566	750	4.783	1	0.02874	9.68538	1.89791	0.526894
rs9282638	3	120746460	CD80	C	T	REC	2	138	19	591	750	1.19	1	0.2754	92.8098	0.450801	2.21827
rs16829980	3	120761158	CD80	G	A	REC	1	137	7	599	744	0.1958	1	0.6581	221.78	0.624609	1.601
rs16829984	3	120761230	CD80	C	G	REC	1	139	11	597	748	0.8643	1	0.3526	118.826	0.390451	2.56114
rs1880661	3	120761538	CD80	T	C	REC	31	108	133	478	750	0.01894	1	0.8905	300.099	1.03161	0.969362
CD80_035889	3	120795177	CD80	A	G	REC	5	134	32	577	748	0.6612	1	0.4161	140.226	0.672808	1.48631
rs2681417	3	123307887	CD86	G	A	REC	1	139	3	608	751	0.1072	1	0.7434	250.526	1.45803	0.685855
rs1129055	3	123321009	CD86	A	G	REC	10	130	38	571	749	0.1548	1	0.694	233.878	1.15587	0.865149
rs17281995	3	123322331	CD86	G	C	REC	3	137	8	603	751	0.5483	1	0.459	154.683	1.65055	0.60586
rs2305619	3	158637555	PTX3	A	G	REC	33	103	141	468	745	0.0768	1	0.7817	263.433	1.06342	0.940365
rs3845978	3	158642388	PTX3	A	G	REC	0	140	1	608	749	NA	NA	NA	NA	NA	NA
rs3911403	3	158644821	PTX3	T	A	REC	1	138	6	602	747	0.08715	1	0.7678	258.749	0.727053	1.37542
rs3921	4	77161967	CXCL10	C	G	REC	27	112	117	491	747	0.002383	1	0.9611	323.891	1.01168	0.988459
rs4256246	4	77164546	CXCL10	A	G	REC	2	136	16	594	748	0.6601	1	0.4165	140.361	0.545956	1.83165
rs230525	4	103677907	NFKB1	G	A	REC	14	125	60	550	749	0.007074	1	0.933	314.421	1.02667	0.974026
rs4648050	4	103733779	NFKB1	G	A	REC	15	125	54	553	747	0.4485	1	0.503	169.511	1.22889	0.813743
rs4648095	4	103746914	NFKB1	G	A	REC	0	140	1	609	750	NA	NA	NA	NA	NA	NA
rs1049253	4	185785945	CASP3	C	T	REC	9	131	19	589	748	3.447	1	0.06338	21.3591	2.12977	0.469534
rs2705897	4	185790092	CASP3	A	C	REC	13	127	39	569	748	1.45	1	0.2285	77.0045	1.49344	0.669596
rs2720376	4	185791294	CASP3	G	A	REC	29	110	129	481	749	0.005494	1	0.9409	317.083	0.983016	1.01728
rs2705901	4	185796481	CASP3	G	C	REC	3	137	15	595	750	0.04859	1	0.8255	278.194	0.868613	1.15126
rs4647610	4	185804925	CASP3	T	C	REC	2	138	11	599	750	0.09386	1	0.7593	255.884	0.789196	1.26711
rs2720378	4	185805107	CASP3	C	G	REC	12	122	51	554	739	0.03884	1	0.8438	284.361	1.06847	0.935921
rs4647603	4	185806724	CASP3	T	C	REC	5	123	8	592	728	3.982	1	0.04599	15.4986	3.00813	0.332432
rs3775296	4	187234761	TLR3	T	G	REC	5	135	28	583	751	0.2772	1	0.5985	201.695	0.771164	1.29674
rs1879026	4	187237315	TLR3	T	G	REC	5	135	13	596	749	1.002	1	0.3169	106.795	1.69801	0.588926
rs3775291	4	187241068	TLR3	T	C	REC	12	127	51	558	748	0.00982	1	0.9211	310.411	1.03381	0.967294
rs3775290	4	187241211	TLR3	T	C	REC	12	128	61	550	751	0.2589	1	0.6109	205.873	0.845287	1.18303
rs2069187	5	54433806	GZMA	C	T	REC	0	140	22	588	750	NA	NA	NA	NA	NA	NA
rs1051846	5	54439814	GZMA	C	G	REC	0	140	6	604	750	NA	NA	NA	NA	NA	NA
rs839	5	131847025	IRF1	T	C	REC	16	98	63	523	700	1.028	1	0.3106	104.672	1.35536	0.737811
rs2070729	5	131847820	IRF1	T	G	REC	33	106	109	495	743	2.37	1	0.1237	41.6869	1.4138	0.707316
rs17622656	5	131848896	IRF1	A	G	REC	18	122	81	523	744	0.03018	1	0.8621	290.528	0.952641	1.04971
rs1800630	6	31650455	TNF	A	C	REC	5	134	15	591	745	0.5447	1	0.4605	155.189	1.47015	0.680203
rs3093662	6	31652168	TNF	G	A	REC	0	138	2	604	744	NA	NA	NA	NA	NA	NA
rs11914	6	137561281	IFNGR1	G	T	REC	6	134	13	595	748	2.12	1	0.1454	48.9998	2.04937	0.487955
rs3799488	6	137561473	IFNGR1	G	A	REC	1	139	20	589	749	2.758	1	0.09674	32.6014	0.211871	4.71986
rs1327474	6	137582768	IFNGR1	C	T	REC	26	114	116	489	745	0.02672	1	0.8702	293.257	0.961434	1.04011
rs752637	7	128366656	IRF5	T	C	REC	20	118	89	519	746	0.001906	1	0.9652	325.272	0.988383	1.01175
rs3807306	7	128367916	IRF5	T	G	REC	23	115	124	484	746	0.988	1	0.3202	107.907	0.780645	1.28099
rs1874328	7	128372340	IRF5	C	T	REC	15	124	74	535	748	0.1996	1	0.655	220.735	0.874564	1.14343
rs10108662	8	39899146	INDO	A	C	REC	20	120	62	546	748	1.949	1	0.1627	54.8299	1.46774	0.681319
rs3739319	8	39904478	INDO	A	G	REC	33	107	82	528	750	8.998	1	0.002702	0.910574	1.98587	0.503558
rs268561	8	71656476	TRAM1	G	A	REC	17	123	66	543	749	0.1969	1	0.6573	221.51	1.1371	0.879428
rs7011101	8	71664028	TRAM1	C	A	REC	1	139	9	600	749	0.5038	1	0.4778	161.019	0.479616	2.085
rs3816745	8	71669188	TRAM1	C	G	REC	24	116	93	517	750	0.3112	1	0.5769	194.415	1.15017	0.869439
rs17686100	8	71669566	TRAM1	G	A	REC	1	139	4	607	751	0.006122	1	0.9376	315.971	1.09173	0.91598
rs268594	8	71675684	TRAM1	A	G	REC	10	129	49	558	746	0.1198	1	0.7293	245.774	0.882772	1.1328
rs268598	8	71677425	TRAM1	G	A	REC	0	140	4	605	749	NA	NA	NA	NA	NA	NA
rs268600	8	71680925	TRAM1	G	A	REC	0	120	1	595	716	NA	NA	NA	NA	NA	NA
rs10429491	9	5040706	JAK2	A	G	REC	13	127	44	565	749	0.6875	1	0.407	137.159	1.31442	0.76079
rs2230724	9	5071780	JAK2	G	A	REC	27	112	152	457	748	1.904	1	0.1676	56.4812	0.7248	1.37969
rs12340866	9	5084185	JAK2	A	G	REC	11	128	36	572	747	0.7619	1	0.3827	128.97	1.36545	0.732359
rs3780378	9	5102288	JAK2	G	A	REC	28	111	140	467	746	0.5528	1	0.4572	154.076	0.841441	1.18844
rs3780379	9	5102519	JAK2	A	G	REC	5	132	20	588	745	0.04472	1	0.8325	280.553	1.11364	0.897959
rs10815160	9	5106616	JAK2	C	A	REC	12	127	37	572	748	1.209	1	0.2715	91.4955	1.46074	0.684586
rs822336	9	5438690	PDCD1L1	G	C	REC	32	107	123	486	748	0.5496	1	0.4585	154.514	1.18167	0.846258
rs12002985	9	5446587	PDCD1L1	G	C	REC	31	109	144	466	750	0.1364	1	0.7119	239.91	0.920362	1.08653
rs17804441	9	5447733	PDCD1L1	G	A	REC	9	130	35	575	749	0.1112	1	0.7387	248.942	1.13736	0.879227
rs2297137	9	5455732	PDCD1L1	T	C	REC	2	138	32	563	735	4.007	1	0.04531	15.2695	0.254982	3.92185
PDCD1L1_017464	9	5456085	PDCD1L	G	A	REC	9	131	29	579	748	0.6494	1	0.4203	141.641	1.37168	0.729035
PDCD1L1_019180	9	5457801	PDCD1L1	A	G	REC	1	139	2	609	751	0.4287	1	0.5127	172.78	2.19065	0.456486
rs2297136	9	5457955	PDCD1L1	C	T	REC	40	100	149	460	749	1.017	1	0.3133	105.582	1.2349	0.809783
rs4143815	9	5458257	PDCD1L1	C	G	REC	8	131	51	556	746	1.088	1	0.297	100.089	0.665769	1.50202
rs16923189	9	5500644	PDCD1LG2	G	A	REC	14	126	49	560	749	0.5642	1	0.4526	152.526	1.26984	0.7875
rs7854413	9	5547708	PDCD1LG2	G	A	REC	3	137	12	598	750	0.01792	1	0.8935	301.109	1.09124	0.916388
rs7852996	9	5559860	PDCD1LG2	T	A	REC	3	137	10	598	748	0.1653	1	0.6843	230.609	1.30949	0.763657
rs1051922	9	21067716	IFNB1	T	C	REC	16	124	60	549	749	0.3102	1	0.5775	194.618	1.18065	0.846995
rs28383793	9	21430416	IFNA	G	A	REC	1	139	0	611	751	NA	NA	NA	NA	NA	NA
rs12685904	9	21431310	IFNA	C	A	REC	0	139	2	607	748	NA	NA	NA	NA	NA	NA
rs10985085	9	122705118	TRAF1	A	G	REC	1	138	0	611	750	NA	NA	NA	NA	NA	NA
rs4836834	9	122705722	TRAF1	T	A	REC	32	108	112	499	751	1.506	1	0.2198	74.0726	1.32011	0.757515
rs2239657	9	122711341	TRAF1	G	A	REC	19	118	82	523	742	0.00942	1	0.9227	310.95	1.02697	0.973735
rs13440146	9	122721272	TRAF1	A	C	REC	0	135	5	600	740	NA	NA	NA	NA	NA	NA
rs10824792	10	54196212	MBL2	G	A	REC	32	108	93	515	748	4.674	1	0.03062	10.3189	1.64078	0.609466
rs11595876	10	54196768	MBL2	G	A	REC	1	139	4	607	751	0.006122	1	0.9376	315.971	1.09173	0.91598
rs930507	10	54198272	MBL2	G	C	REC	4	136	19	589	748	0.0274	1	0.8685	292.685	0.911765	1.09677
rs1838066	10	54199331	MBL2	G	A	REC	14	126	89	521	750	2.025	1	0.1547	52.1339	0.650437	1.53743
rs10824793	10	54199486	MBL2	G	A	REC	37	103	119	491	750	3.31	1	0.06885	23.2024	1.48217	0.674685
rs4647964	10	54201105	MBL2	G	G	REC	0	130	0	586	716	NA	NA	NA	NA	NA	NA
rs1800450	10	54201241	MBL2	T	C	REC	4	136	10	601	751	0.9274	1	0.3355	113.064	1.76765	0.565724
rs1889490	10	72027719	PRF1	T	C	REC	23	115	108	501	747	0.08863	1	0.7659	258.108	0.927778	1.07784
rs35069510	10	72032901	PRF1	T	C	REC	1	139	5	600	745	0.0179	1	0.8936	301.143	0.863309	1.15833
rs1800682	10	90739943	FAS	C	T	REC	37	101	128	480	746	2.165	1	0.1411	47.5507	1.37376	0.727928
rs2234978	10	90761809	FAS	A	G	REC	13	126	55	553	747	0.01284	1	0.9098	306.603	1.03737	0.963973
rs1051070	10	90764752	FAS	T	A	REC	2	136	2	604	744	2.633	1	0.1047	35.2839	4.44118	0.225166
rs17468739	10	91055929	IFIT2	C	A	REC	2	138	19	588	747	1.206	1	0.2722	91.7314	0.448513	2.22959
rs2070845	10	91056055	IFIT2	G	A	REC	10	130	41	568	749	0.03023	1	0.862	290.494	1.06567	0.93838
rs954439	10	91056440	IFIT2	T	A	REC	20	105	138	447	710	3.429	1	0.06406	21.5882	0.616977	1.62081
rs1727	10	91056749	IFIT2	C	A	REC	7	132	44	565	748	0.8535	1	0.3556	119.837	0.680957	1.46852
rs303215	10	91146811	IFIT1	G	A	REC	8	132	26	584	750	0.5547	1	0.4564	153.807	1.36131	0.734589
rs11203109	10	91147139	IFIT1	G	A	REC	13	127	51	558	749	0.121	1	0.728	245.336	1.11996	0.892887
rs304485	10	91149890	IFIT1	A	T	REC	26	114	135	473	748	0.889	1	0.3458	116.535	0.79909	1.25142
rs303212	10	91151335	IFIT1	G	A	REC	13	126	42	569	750	1.024	1	0.3116	105.009	1.39777	0.715425
rs303211	10	91152477	IFIT1	A	G	REC	0	139	1	610	750	NA	NA	NA	NA	NA	NA
rs3809112	11	297036	IFITM2	G	A	REC	35	104	89	519	747	9.081	1	0.002582	0.870134	1.96251	0.509551
rs11246062	11	303755	IFITM1	G	C	REC	17	121	54	555	747	1.559	1	0.2119	71.4103	1.44399	0.692528
rs3758650	11	606865	IRF7	A	G	REC	1	132	2	602	737	0.476	1	0.4902	165.197	2.2803	0.438538
rs731909	11	2365200	CD81	C	G	REC	3	136	14	595	748	0.01007	1	0.9201	310.074	0.9375	1.06667
rs800335	11	2367517	CD81	G	A	REC	4	134	26	579	743	0.5676	1	0.4512	152.054	0.664753	1.50432
rs3740961	11	36466647	TRAF6	C	T	REC	4	136	12	597	749	0.4281	1	0.5129	172.847	1.46324	0.683417
rs331457	11	36480188	TRAF6	T	C	REC	0	140	10	597	747	NA	NA	NA	NA	NA	NA
rs5030419	11	36487319	TRAF6	G	C	REC	2	137	9	598	746	0.001497	1	0.9691	326.587	0.969992	1.03094
rs7127254	11	46265125	CREB3L1	A	G	REC	12	128	29	581	750	3.211	1	0.07316	24.6549	1.87823	0.532415
rs11038852	11	46270467	CREB3L1	G	C	REC	15	124	48	561	748	1.242	1	0.2651	89.3387	1.41381	0.707308
rs4625425	11	46289469	CREB3L1	C	A	REC	3	136	18	591	748	0.2637	1	0.6076	204.761	0.724265	1.38071
rs2288249	11	46290815	CREB3L1	A	G	REC	1	138	1	608	748	1.308	1	0.2527	85.1599	4.4058	0.226974
rs4963271	11	63061760	RARRES3	G	A	REC	8	132	20	588	748	1.857	1	0.173	58.301	1.78182	0.561224
rs1131715	11	69731135	FADD	G	A	REC	27	111	102	508	748	0.6378	1	0.4245	143.056	1.21145	0.825459
rs7115875	11	75737878	PRKRIR	G	A	REC	0	140	8	595	743	NA	NA	NA	NA	NA	NA
rs3824908	11	75754968	PRKRIR	C	A	REC	5	134	32	578	749	0.6553	1	0.4182	140.933	0.673974	1.48374
rs7925910	11	75765047	PRKRIR	G	A	REC	1	138	9	599	747	0.4959	1	0.4813	162.198	0.482287	2.07346
rs4320976	11	75765492	PRKRIR	A	G	REC	3	137	18	592	750	0.2731	1	0.6012	202.604	0.720195	1.38851
rs4252249	11	117364419	IL10RA	A	G	REC	4	134	6	601	745	3.098	1	0.0784	26.4208	2.99005	0.334443
rs2508450	11	117369039	IL10RA	A	G	REC	28	112	114	497	751	0.1338	1	0.7145	240.787	1.08991	0.917505
rs3135932	11	117369273	IL10RA	G	A	REC	1	138	19	592	750	2.493	1	0.1144	38.5528	0.225782	4.42905
rs4252314	11	117373727	IL10RA	G	A	REC	0	139	0	611	750	NA	NA	NA	NA	NA	NA
rs2229113	11	117374880	IL10RA	A	G	REC	9	130	69	539	747	2.874	1	0.09003	30.3401	0.540803	1.8491
rs9610	11	117377296	IL10RA	A	G	REC	25	115	124	487	751	0.4255	1	0.5142	173.285	0.853787	1.17125
rs8177352	11	125659053	TIRAP	G	A	REC	5	127	28	577	737	0.1789	1	0.6724	226.599	0.811305	1.23258
rs3802813	11	125667678	TIRAP	A	G	REC	0	139	0	610	749	NA	NA	NA	NA	NA	NA
rs3802814	11	125667817	TIRAP	A	G	REC	3	136	19	591	749	0.3633	1	0.5467	184.238	0.686146	1.45742
rs8177375	11	125668274	TIRAP	G	A	REC	1	138	6	605	750	0.08444	1	0.7714	259.962	0.730676	1.3686
rs8177376	11	125668822	TIRAP	C	A	REC	4	135	40	570	749	2.772	1	0.09592	32.325	0.422222	2.36842
rs625413	11	125669559	TIRAP	A	G	REC	11	128	28	583	750	2.549	1	0.1104	37.2048	1.78934	0.558865
rs1786704	11	125670967	TIRAP	G	A	REC	12	128	33	576	749	2.004	1	0.1569	52.8753	1.63636	0.611111
rs17199006	12	7775618	CLEC4C	G	A	REC	4	136	14	596	750	0.1536	1	0.6951	234.249	1.2521	0.798658
rs1894823	12	7781816	CLEC4C	A	G	REC	6	133	47	562	748	1.988	1	0.1585	53.4145	0.539434	1.8538
rs10845821	12	7791451	CLEC4C	A	G	REC	19	119	96	515	749	0.3273	1	0.5673	191.18	0.85653	1.1675
rs4251460	12	42449035	IRAK4	C	A	REC	3	137	13	595	748	1.2e-05	1	0.9972	336.056	1.00225	0.997759
rs4251513	12	42460471	IRAK4	G	C	REC	44	95	130	480	749	6.791	1	0.009163	3.08793	1.71012	0.584754
rs4251580	12	42461033	IRAK4	A	G	REC	2	138	9	599	748	0.002099	1	0.9635	324.7	0.964573	1.03673
rs4251520	12	42461605	IRAK4	G	A	REC	5	134	7	601	747	4.282	1	0.03853	12.9846	3.20362	0.312146
rs4251545	12	42466562	IRAK4	A	G	REC	1	139	10	597	747	0.6828	1	0.4086	137.698	0.429496	2.32831
rs1544410	12	46526102	VDR	T	C	REC	21	117	103	508	749	0.2192	1	0.6396	215.545	0.885238	1.12964
rs2066807	12	55026949	STAT2	G	C	REC	0	140	6	604	750	NA	NA	NA	NA	NA	NA
rs7316037	12	63133078	TBK1	A	G	REC	2	134	5	596	737	0.4808	1	0.4881	164.49	1.7791	0.562081
rs11175398	12	63137245	TBK1	G	A	REC	31	107	128	479	745	0.1269	1	0.7217	243.213	1.08419	0.922352
rs10878175	12	63153605	TBK1	C	G	REC	17	123	38	568	746	5.743	1	0.01656	5.58072	2.0659	0.484051
rs7303577	12	63160369	TBK1	C	A	REC	2	138	11	600	751	0.09254	1	0.761	256.457	0.790514	1.265
rs2069727	12	66834490	IFNG	C	T	REC	24	115	121	486	746	0.5141	1	0.4734	159.536	0.838232	1.19299
rs2069718	12	66836429	IFNG	T	C	REC	22	117	120	491	750	1.072	1	0.3004	101.235	0.769373	1.29976
rs2069716	12	66837082	IFNG	C	T	REC	0	140	1	607	748	NA	NA	NA	NA	NA	NA
rs1861494	12	66837676	IFNG	G	A	REC	13	127	66	541	747	0.3031	1	0.5819	196.1	0.83906	1.19181
rs10744785	12	111829639	OAS1	G	C	REC	15	124	27	580	746	8.565	1	0.003426	1.15456	2.59857	0.384828
rs34137742	12	111833044	OAS1	A	G	REC	11	115	10	586	722	18.32	1	1.869e-05	0.00629853	5.60522	0.178405
rs3741981	12	111833253	OAS1	G	A	REC	32	108	105	504	749	2.402	1	0.1212	40.8444	1.42222	0.703125
OAS1_004547	12	111833482	OAS1	A	G	REC	0	139	2	601	742	NA	NA	NA	NA	NA	NA
rs10774671	12	111841576	OAS1	G	A	REC	26	113	70	540	749	5.295	1	0.02139	7.20843	1.77497	0.56339
rs1859330	12	111860771	OAS3	C	T	REC	23	105	70	530	728	3.76	1	0.05249	17.6891	1.6585	0.602953
rs7961861	12	111870301	OAS3	G	A	REC	46	90	151	452	739	4.378	1	0.03642	12.2735	1.52995	0.653617
rs2285933	12	111871162	OAS3	G	C	REC	12	127	54	557	750	0.005922	1	0.9387	316.342	0.974628	1.02603
rs2285932	12	111871333	OAS3	T	C	REC	20	119	55	554	748	3.6	1	0.05777	19.4685	1.6929	0.590704
rs2072136	12	111883302	OAS3	T	C	REC	3	137	39	572	751	3.879	1	0.04891	16.4827	0.321168	3.11364
OAS3_026920	12	111885590	OAS3	A	G	REC	9	128	12	593	742	8.542	1	0.00347	1.16939	3.47461	0.287802
OAS3_029396	12	111888066	OAS3	A	G	REC	20	115	76	522	733	0.4291	1	0.5124	172.679	1.19451	0.837165
rs2240188	12	111888067	OAS3	T	C	REC	15	120	66	531	732	0.0003488	1	0.9851	331.979	1.00568	0.99435
rs2010549	12	111893380	OAS3	G	C	REC	4	135	29	578	746	0.9656	1	0.3258	109.795	0.590549	1.69334
rs2072133	12	111893643	OAS3	C	T	REC	9	130	24	586	749	1.735	1	0.1878	63.2886	1.69038	0.591581
rs7138261	12	111894353	OAS3	A	G	REC	0	119	2	586	707	NA	NA	NA	NA	NA	NA
rs2072138	12	111909276	OAS2	C	G	REC	10	129	53	556	748	0.3339	1	0.5634	189.866	0.813222	1.22968
rs35992364	12	111917267	OAS2	G	A	REC	5	135	24	587	751	0.03901	1	0.8434	284.226	0.905864	1.10392
rs1293755	12	111919833	OAS2	T	A	REC	12	127	51	558	748	0.00982	1	0.9211	310.411	1.03381	0.967294
rs2072137	12	111925304	OAS2	C	T	REC	23	117	106	503	749	0.07622	1	0.7825	263.702	0.932833	1.072
rs929291	12	111928801	OAS2	T	C	REC	13	127	54	550	744	0.01654	1	0.8977	302.525	1.04258	0.959161
rs916973	12	111931486	OAS2	C	T	REC	2	138	8	598	746	0.01011	1	0.9199	310.006	1.08333	0.923077
rs15895	12	111932671	OAS2	T	C	REC	17	123	70	541	751	0.05237	1	0.819	276.003	1.06818	0.936175
rs13311	12	111933035	OAS2	A	C	REC	20	119	82	528	749	0.0861	1	0.7692	259.22	1.08219	0.924053
rs1296371	12	111934088	OAS2	C	T	REC	6	131	32	559	728	0.2408	1	0.6236	210.153	0.800095	1.24985
rs12819210	12	119942783	OASL	A	G	REC	10	130	19	592	751	4.991	1	0.02548	8.58676	2.39676	0.41723
rs3213546	12	119955599	OASL	C	G	REC	0	140	0	610	750	NA	NA	NA	NA	NA	NA
rs3213545	12	119955720	OASL	T	C	REC	3	136	46	562	747	5.397	1	0.02017	6.79729	0.269501	3.71056
rs10774580	12	119960806	OASL	A	G	REC	24	116	89	520	749	0.5682	1	0.451	151.987	1.20883	0.827244
rs28360475	12	119961429	OASL	G	A	REC	5	134	36	573	748	1.17	1	0.2794	94.1578	0.593905	1.68377
rs2236350	14	23700850	ISGF3G	T	G	REC	2	137	7	600	746	0.07742	1	0.7808	263.13	1.2513	0.799167
rs12436555	14	23704665	ISGF3G	A	G	REC	4	135	22	585	746	0.1875	1	0.665	224.105	0.787879	1.26923
rs2236338	14	24170122	GZMB	G	A	REC	7	133	31	577	748	0.002298	1	0.9618	324.127	0.979626	1.0208
rs11539752	14	24171429	GZMB	C	G	REC	6	132	28	581	747	0.01617	1	0.8988	302.896	0.943182	1.06024
rs2273844	14	24173254	GZMB	A	G	REC	6	134	31	579	750	0.1539	1	0.6948	234.148	0.836302	1.19574
rs28489163	14	93645984	IFI27	A	G	REC	4	136	6	603	749	3.028	1	0.08184	27.5801	2.95588	0.338308
IFI27_000630	14	93646335	IFI27	G	C	REC	6	134	38	572	750	0.779	1	0.3774	127.184	0.673998	1.48368
rs3814821	14	93646690	IFI27	T	C	REC	28	112	150	461	751	1.304	1	0.2535	85.4295	0.768333	1.30152
rs2799	14	93652679	IFI27	C	G	REC	0	133	5	601	739	NA	NA	NA	NA	NA	NA
IFI27_007273	14	93652978	IFI27	0	C	REC	0	139	0	611	750	NA	NA	NA	NA	NA	NA
rs1243081	14	93653215	IFI27	A	G	REC	2	123	6	579	710	0.305	1	0.5808	195.73	1.56911	0.637306
rs7141881	14	93653617	IFI27	A	G	REC	23	116	68	541	748	3.066	1	0.07992	26.933	1.57746	0.633931
rs1243082	14	93653748	IFI27	A	C	REC	4	136	0	609	749	NA	NA	NA	NA	NA	NA
rs10132928	14	93654162	IFI27	G	A	REC	38	102	129	480	749	2.334	1	0.1265	42.6305	1.38623	0.721382
rs4780355	16	11255359	SOCS1	G	A	REC	7	125	64	538	734	3.518	1	0.06072	20.4626	0.47075	2.12427
rs243330	16	11258492	SOCS1	T	C	REC	29	102	136	466	733	0.01271	1	0.9102	306.737	0.974193	1.02649
rs3760396	17	29605554	CCL2	G	C	REC	6	134	31	580	751	0.151	1	0.6976	235.091	0.837747	1.19368
rs2857656	17	29606120	CCL2	G	C	REC	12	127	43	564	746	0.3974	1	0.5284	178.071	1.23933	0.806885
rs4586	17	29607382	CCL2	G	A	REC	20	120	74	535	749	0.4726	1	0.4918	165.737	1.20495	0.829907
rs4969168	17	73865388	SOCS3	A	G	REC	8	129	24	584	745	0.9737	1	0.3238	109.121	1.50904	0.662671
rs2292151	19	4767719	TICAM1	T	C	REC	13	125	32	576	746	3.429	1	0.06406	21.5882	1.872	0.534188
rs7255265	19	4769378	TICAM1	A	G	REC	18	121	88	522	749	0.2032	1	0.6522	219.791	0.882419	1.13325
rs12609318	19	6614916	TNFSF14	A	G	REC	12	125	37	571	745	1.301	1	0.2541	85.6317	1.48151	0.674985
rs1077667	19	6619972	TNFSF14	T	C	REC	3	136	21	590	750	0.5977	1	0.4394	148.078	0.619748	1.61356
rs8106574	19	6622142	TNFSF14	A	G	REC	7	132	31	572	742	0.002563	1	0.9596	323.385	0.978495	1.02198
rs8112310	19	7710320	CD209	A	T	REC	7	133	11	599	750	4.968	1	0.02583	8.70471	2.86603	0.348915
rs4804801	19	7713482	CD209	T	A	REC	6	129	9	570	714	4.446	1	0.03499	11.7916	2.94574	0.339474
rs4804802	19	7713610	CD209	A	G	REC	1	139	3	607	750	0.1062	1	0.7445	250.897	1.45564	0.686985
rs8105572	19	7715327	CD209	A	G	REC	0	140	5	600	745	NA	NA	NA	NA	NA	NA
rs11465384	19	7716006	CD209	T	C	REC	0	140	1	607	748	NA	NA	NA	NA	NA	NA
rs2287886	19	7718536	CD209	A	G	REC	17	122	70	538	747	0.05653	1	0.8121	273.678	1.07096	0.933742
rs735240	19	7719336	CD209	A	G	REC	25	115	135	473	748	1.279	1	0.2581	86.9797	0.761675	1.3129
rs7252764	19	7733137	CLEC4M	A	G	REC	0	140	1	606	747	NA	NA	NA	NA	NA	NA
rs2287887	19	7733955	CLEC4M	C	A	REC	16	123	37	571	747	5.052	1	0.0246	8.2902	2.00747	0.498139
rs868876	19	7737226	CLEC4M	A	T	REC	15	124	46	563	748	1.584	1	0.2082	70.1634	1.48054	0.675429
rs475896	19	7737429	CLEC4M	C	G	REC	26	114	104	506	750	0.1841	1	0.6678	225.049	1.10965	0.901186
rs558705	19	7738183	CLEC4M	T	C	REC	1	136	3	605	745	0.1171	1	0.7322	246.751	1.48284	0.67438
rs557094	19	7738286	CLEC4M	G	C	REC	2	138	8	599	747	0.01054	1	0.9182	309.433	1.08514	0.921536
rs2161525	19	7738664	CLEC4M	G	A	REC	18	120	98	509	745	0.8227	1	0.3644	122.803	0.779082	1.28356
rs8113469	19	7738959	CLEC4M	G	A	REC	11	127	31	574	743	1.708	1	0.1913	64.4681	1.60376	0.623535
rs12610506	19	7739071	CLEC4M	A	G	REC	18	122	68	541	749	0.3204	1	0.5714	192.562	1.17382	0.85192
rs3745376	19	7739690	CLEC4M	A	C	REC	6	134	20	588	748	0.3366	1	0.5618	189.327	1.31642	0.759637
rs15282	19	7740274	CLEC4M	T	C	REC	16	124	53	557	750	1.023	1	0.3117	105.043	1.35606	0.737433
rs2304207	19	54859538	IRF3	C	G	REC	4	135	19	590	748	0.02227	1	0.8814	297.032	0.920078	1.08686
rs2304204	19	54860832	IRF3	C	T	REC	9	130	55	555	749	0.9358	1	0.3334	112.356	0.698601	1.43143
rs752118	20	44180145	CD40	A	G	REC	4	134	31	578	747	1.21	1	0.2713	91.4281	0.556572	1.79671
rs745307	20	44180493	CD40	T	C	REC	10	127	35	571	743	0.4559	1	0.4995	168.332	1.28459	0.778459
rs3765457	20	44190620	CD40	G	A	REC	5	134	20	590	749	0.03558	1	0.8504	286.585	1.10075	0.908475
rs3765459	20	44190814	CD40	A	G	REC	4	133	28	580	745	0.7727	1	0.3794	127.858	0.622986	1.60517
rs11569345	20	44191928	CD40	A	G	REC	0	140	1	609	750	NA	NA	NA	NA	NA	NA
rs11569348	20	44192680	CD40	A	C	REC	4	133	16	593	746	0.03666	1	0.8482	285.843	1.11466	0.897133
rs2226299	21	33620794	IFNAR1	A	G	REC	3	133	22	585	743	0.6876	1	0.407	137.159	0.599795	1.66724
rs2252930	21	33626071	IFNAR1	C	G	REC	9	131	58	552	750	1.327	1	0.2493	84.0141	0.653856	1.52939
rs2252931	21	33626190	IFNAR1	A	G	REC	9	130	59	552	750	1.39	1	0.2384	80.3408	0.647718	1.54388
rs17643419	21	33633668	IFNAR1	A	G	REC	0	140	4	606	750	NA	NA	NA	NA	NA	NA
rs2253923	21	33634289	IFNAR1	A	T	REC	19	121	92	519	751	0.1996	1	0.655	220.735	0.885825	1.12889
rs2257167	21	33637569	IFNAR1	G	C	REC	3	137	8	600	748	0.5372	1	0.4636	156.233	1.64234	0.608889
rs12483293	21	33638659	IFNAR1	C	A	REC	13	127	58	551	749	0.00752	1	0.9309	313.713	0.972441	1.02834
rs2243600	21	33645531	IFNAR1	A	C	REC	8	131	44	567	750	0.3669	1	0.5447	183.564	0.786954	1.27072
rs2834202	21	33652824	IFNAR1	G	A	REC	8	132	37	569	746	0.03072	1	0.8609	290.123	0.932023	1.07293
rs9808753	21	33709182	IFNGR2	G	A	REC	2	137	7	603	749	0.08092	1	0.7761	261.546	1.25756	0.795191
rs11910627	21	33721220	IFNGR2	G	C	REC	4	136	58	551	749	6.663	1	0.009841	3.31642	0.279412	3.57895
rs1059293	21	33731563	IFNGR2	A	G	REC	47	93	133	478	751	8.709	1	0.003167	1.06728	1.81631	0.550565
rs2071430	21	41719935	MX1	0	C	REC	0	137	0	602	739	NA	NA	NA	NA	NA	NA
rs7280422	21	41723437	MX1	C	G	REC	3	136	33	573	745	2.657	1	0.1031	34.7447	0.383021	2.61082
rs455599	21	41726549	MX1	G	A	REC	27	113	148	462	750	1.576	1	0.2093	70.5341	0.745874	1.34071
rs457347	21	41726740	MX1	G	A	REC	26	114	148	459	747	2.15	1	0.1426	48.0562	0.707326	1.41378
rs468672	21	41728034	MX1	A	T	REC	20	111	83	521	735	0.2079	1	0.6484	218.511	1.13101	0.884165
rs2838036	21	41729610	MX1	A	T	REC	0	140	0	609	749	NA	NA	NA	NA	NA	NA
rs8132871	21	41732690	MX1	A	G	REC	3	136	20	587	746	0.489	1	0.4844	163.243	0.647426	1.54458
rs467558	21	41733265	MX1	G	A	REC	11	126	64	543	744	0.7796	1	0.3773	127.15	0.740699	1.35008
rs467960	21	41734761	MX1	G	A	REC	30	110	110	501	751	0.8811	1	0.3479	117.242	1.24215	0.805057
rs469390	21	41739800	MX1	G	A	REC	26	114	98	513	751	0.5298	1	0.4667	157.278	1.19388	0.837607
rs7277299	21	41740660	MX1	A	C	REC	2	138	6	604	750	0.2136	1	0.6439	216.994	1.45894	0.68543
rs467639	21	41741434	MX1	A	T	REC	9	130	47	561	747	0.2571	1	0.6121	206.278	0.82635	1.21014
rs2070229	21	41742983	MX1	G	A	REC	9	131	44	565	749	0.1098	1	0.7404	249.515	0.8822	1.13353
rs469218	21	41743564	MX1	A	G	REC	2	129	6	559	696	0.2022	1	0.653	220.061	1.44444	0.692308
rs3737399	21	41745242	MX1	A	G	REC	28	112	86	519	745	2.936	1	0.08663	29.1943	1.50872	0.662813
rs1050008	21	41746531	MX1	G	A	REC	5	135	17	593	750	0.2461	1	0.6198	208.873	1.29194	0.77403
rs467593	21	41748421	MX1	G	A	REC	11	127	50	558	746	0.009563	1	0.9221	310.748	0.966614	1.03454
rs468811	21	41751716	MX1	A	G	REC	5	135	21	589	750	0.005645	1	0.9401	316.814	1.0388	0.962649
rs13433394	21	41753780	MX1	A	G	REC	3	136	16	594	749	0.09887	1	0.7532	253.828	0.818934	1.2211
rs4819387	21	44471630	B7H2	A	G	REC	25	115	121	490	751	0.2755	1	0.5996	202.065	0.880345	1.13592
rs4819388	21	44471849	B7H2	A	G	REC	11	127	45	564	747	0.05493	1	0.8147	274.554	1.08556	0.92118
rs11558819	21	44481202	B7H2	T	C	REC	10	129	40	569	748	0.07112	1	0.7897	266.129	1.10271	0.906854
rs378299	21	44485771	B7H2	C	T	REC	26	107	104	501	738	0.418	1	0.5179	174.532	1.17056	0.854291
Legend
SNP	rsID for Single Nucleotide Polymorphism
CHR	Chromosome
Position	Genomic Position
Gene	HUGO gene name
D (minor Allele)	Minor allele according to the frequency reported for this dataset
d (major Allele)	Major allele according to the frequency reported for this dataset
TEST	Association test performed
Symptomatic DD	DD Genotypes in symptomatic cases
Symptomatic Dd	Dd Genotypes in symptomatic cases
Symptomatic dd	dd Genotypes in symptomatic cases
Asymptomatic DD	DD Genotypes in asymptomatic controls
Asymptomatic Dd	DD Genotypes in asymptomatic controls
Asymptomatic dd	DD Genotypes in asymptomatic controls
n	Number of individuals included in the analysis
CHISQ	Chi-squared test statistic
DF	Degrees of Freedom
P-value	Asymptotic p-value for chi-square statistic
Bonferroni p-value	Bonferroni corrected p-value
OR Minor Allele	Odds ratio calculated for the minor allele
OR Major Allele	Odds ratio calculated for the major allele
