# Supplementary material for: Host Genetic Risk Factors for West Nile Virus Infection and Disease Progression
Source: PLoS One. 2011 Sep 15;6(9):e24745. doi: 10.1371/journal.pone.0024745 (PMC3174177; doi:10.1371/journal.pone.0024745)
Supplement: Table S13 — WNE/P vs. WNF/M logistic regression analysis results for an additive model of inheritance. (XLS) [file pone.0024745.s013.xls]

## Sheet: Sheet1
Table S13. WNE/P vs. WNF/M logistic regression analysis results for an additive model of inheritance Odds Ratios were calculated using logistic regression. The first five PC's were included as covariates to control for population stratification. P-values were corrected for multiple tests using the Bonferroni correction.
SNP	CHR	Position	Gene	Minor Allele	Major Allele	TEST	n	OR Minor Allele	OR Major Allele	SE	L95 Minor Allele	U95 Minor Allele	L95 Major Allele	U95 Major Allele	STAT	P-value	Bonferroni P-Value
rs2254002	1	65074257	JAK1	T	G	ADD	748	0.7964	1.256	0.2407	0.4969	1.276	0.7834	2.013	-0.9458	0.3442	115.995
rs4916004	1	65076098	JAK1	A	G	ADD	747	0.9894	1.011	0.242	0.6157	1.59	0.629	1.624	-0.04418	0.9648	325.138
rs310244	1	65078465	JAK1	T	C	ADD	747	0.6855	1.459	0.2277	0.4387	1.071	0.9337	2.279	-1.659	0.0972	32.7564
rs310247	1	65079997	JAK1	T	C	ADD	747	0.5815	1.72	0.2655	0.3456	0.9784	1.022	2.894	-2.042	0.04114	13.8642
rs2230587	1	65083850	JAK1	T	C	ADD	749	1.017	0.9831	0.2046	0.6812	1.519	0.6584	1.468	0.08328	0.9336	314.623
rs10789166	1	65085401	JAK1	G	A	ADD	749	0.8342	1.199	0.2577	0.5034	1.382	0.7234	1.987	-0.7035	0.4818	162.367
rs310219	1	65087886	JAK1	T	C	ADD	746	0.7767	1.287	0.2423	0.483	1.249	0.8007	2.07	-1.043	0.297	100.089
rs188698	1	65091172	JAK1	C	T	ADD	749	0.6784	1.474	0.222	0.4391	1.048	0.954	2.278	-1.748	0.08049	27.1251
rs2256298	1	65103270	JAK1	T	C	ADD	742	0.8724	1.146	0.1846	0.6076	1.253	0.7982	1.646	-0.7392	0.4598	154.953
rs11585932	1	65107683	JAK1	G	A	ADD	742	0.7019	1.425	0.2854	0.4012	1.228	0.8142	2.493	-1.24	0.215	72.455
rs12135754	1	65115093	JAK1	C	A	ADD	749	0.8679	1.152	0.255	0.5266	1.431	0.699	1.899	-0.5555	0.5786	194.988
rs310201	1	65122196	JAK1	C	T	ADD	749	0.8167	1.224	0.2174	0.5333	1.251	0.7996	1.875	-0.9313	0.3517	118.523
rs310199	1	65122710	JAK1	C	T	ADD	749	0.7149	1.399	0.1996	0.4834	1.057	0.9459	2.069	-1.681	0.09274	31.2534
rs310198	1	65123656	JAK1	A	G	ADD	747	0.6935	1.442	0.2909	0.3921	1.226	0.8153	2.55	-1.258	0.2083	70.1971
rs10802189	1	116858253	CD58	A	G	ADD	745	1.02	0.9805	0.1425	0.7713	1.349	0.7415	1.296	0.1382	0.8901	299.964
rs17036001	1	116916652	CD58	A	G	ADD	742	1.47	0.6801	0.2738	0.8599	2.515	0.3977	1.163	1.408	0.159	53.583
rs1335531	1	116916900	CD58	G	C	ADD	743	0.712	1.405	0.1652	0.515	0.9843	1.016	1.942	-2.056	0.03979	13.4092
rs6701046	1	117099257	CD2	G	A	ADD	745	1.085	0.9214	0.1607	0.7922	1.487	0.6725	1.262	0.5098	0.6102	205.637
rs3136705	1	117104923	CD2	A	G	ADD	749	1.216	0.8221	0.1937	0.8322	1.778	0.5624	1.202	1.011	0.3118	105.077
rs798043	1	117105020	CD2	T	C	ADD	749	0.9661	1.035	0.1623	0.7029	1.328	0.7531	1.423	-0.2125	0.8317	280.283
rs1801274	1	159746369	FCGR2A	T	C	ADD	749	1.175	0.8509	0.1298	0.9112	1.516	0.6598	1.097	1.244	0.2135	71.9495
rs627839	1	180808704	RNASEL	A	C	ADD	747	1.047	0.9553	0.142	0.7925	1.383	0.7233	1.262	0.3219	0.7475	251.908
rs11072	1	180809954	RNASEL	C	T	ADD	745	0.7106	1.407	0.1602	0.5191	0.9727	1.028	1.926	-2.133	0.03296	11.1075
rs672527	1	180811844	RNASEL	A	G	ADD	748	1.095	0.9135	0.1535	0.8103	1.479	0.6762	1.234	0.5892	0.5557	187.271
rs533259	1	180815642	RNASEL	T	C	ADD	746	1.602	0.6243	0.2601	0.9621	2.667	0.375	1.039	1.811	0.07007	23.6136
rs627928	1	180817960	RNASEL	T	G	ADD	750	0.8141	1.228	0.1376	0.6216	1.066	0.938	1.609	-1.495	0.1349	45.4613
rs486907	1	180821180	RNASEL	T	C	ADD	750	1.057	0.9457	0.1476	0.7918	1.412	0.7081	1.263	0.3784	0.7051	237.619
rs3024498	1	205008152	IL10	C	T	ADD	744	0.9394	1.065	0.1677	0.6762	1.305	0.7663	1.479	-0.373	0.7092	239
rs3024496	1	205008487	IL10	C	T	ADD	746	0.9882	1.012	0.1427	0.747	1.307	0.765	1.339	-0.0835	0.9335	314.589
rs3024509	1	205009920	IL10	C	T	ADD	747	1.013	0.9875	0.2895	0.5742	1.786	0.5599	1.741	0.04353	0.9653	325.306
rs3021094	1	205011575	IL10	G	T	ADD	750	1.312	0.7622	0.2267	0.8413	2.046	0.4888	1.189	1.198	0.231	77.847
rs1800871	1	205013257	IL10	T	C	ADD	746	1.101	0.9081	0.1577	0.8084	1.5	0.6667	1.237	0.6112	0.5411	182.351
rs1800896	1	205013520	IL10	C	T	ADD	748	0.9625	1.039	0.1435	0.7265	1.275	0.7843	1.376	-0.2666	0.7898	266.163
rs3770768	2	37199655	EIF2AK2	T	C	ADD	748	1.008	0.9922	0.201	0.6797	1.495	0.6691	1.471	0.03896	0.9689	326.519
rs4648212	2	37206515	EIF2AK2	T	C	ADD	746	1.178	0.8489	0.2908	0.6663	2.083	0.4801	1.501	0.5634	0.5731	193.135
rs4670185	2	37209038	EIF2AK2	G	A	ADD	749	0.7273	1.375	0.3168	0.3908	1.353	0.739	2.559	-1.005	0.3148	106.088
rs4648186	2	37220611	EIF2AK2	T	C	ADD	747	0.9313	1.074	0.1962	0.634	1.368	0.731	1.577	-0.3629	0.7167	241.528
rs4648184	2	37220999	EIF2AK2	A	T	ADD	750	2.136	0.4682	0.3435	1.089	4.187	0.2388	0.918	2.209	0.02716	9.15292
rs2373114	2	37226754	EIF2AK2	A	G	ADD	745	1.386	0.7215	0.2263	0.8894	2.16	0.463	1.124	1.442	0.1493	50.3141
rs2254958	2	37229795	EIF2AK2	T	C	ADD	744	1.18	0.8471	0.1389	0.8991	1.55	0.6452	1.112	1.194	0.2324	78.3188
rs12712526	2	37236819	EIF2AK2	G	A	ADD	739	1.187	0.8422	0.1371	0.9075	1.553	0.6437	1.102	1.252	0.2104	70.9048
rs7340267	2	37237964	EIF2AK2	G	A	ADD	737	1.247	0.8021	0.1383	0.9506	1.635	0.6116	1.052	1.594	0.111	37.407
rs1990760	2	162832297	IFIH1	G	A	ADD	748	0.8138	1.229	0.1434	0.6144	1.078	0.9278	1.628	-1.437	0.1507	50.7859
rs3747517	2	162837070	IFIH1	T	C	ADD	748	0.7034	1.422	0.1598	0.5142	0.9621	1.039	1.945	-2.201	0.0277	9.3349
rs13023380	2	162862609	IFIH1	A	G	ADD	745	1.358	0.7361	0.1316	1.05	1.758	0.5688	0.9527	2.328	0.01989	6.70293
rs17715343	2	162875992	IFIH1	G	C	ADD	749	1.033	0.9684	0.2583	0.6224	1.713	0.5838	1.607	0.1242	0.9012	303.704
rs2059691	2	179010130	PRKRA	A	G	ADD	748	0.7744	1.291	0.1564	0.57	1.052	0.9505	1.754	-1.635	0.102	34.374
rs2288320	2	179016748	PRKRA	C	A	ADD	746	0.9667	1.034	0.1861	0.6713	1.392	0.7183	1.49	-0.1818	0.8557	288.371
rs3752689	2	179020859	PRKRA	G	A	ADD	744	1.23	0.8129	0.1658	0.889	1.702	0.5874	1.125	1.25	0.2113	71.2081
rs3771300	2	191543841	STAT1	G	T	ADD	748	0.8165	1.225	0.1358	0.6257	1.065	0.9386	1.598	-1.493	0.1354	45.6298
rs2066804	2	191550004	STAT1	T	C	ADD	748	0.8043	1.243	0.1665	0.5803	1.115	0.8971	1.723	-1.308	0.1909	64.3333
rs12693591	2	191568747	STAT1	A	C	ADD	750	1.285	0.7784	0.1768	0.9085	1.816	0.5505	1.101	1.417	0.1564	52.7068
rs10173099	2	191575577	STAT1	A	G	ADD	750	1.184	0.8444	0.1404	0.8993	1.559	0.6413	1.112	1.204	0.2286	77.0382
rs1879877	2	204278245	CD28	T	G	ADD	747	0.989	1.011	0.1513	0.7352	1.33	0.7517	1.36	-0.07323	0.9416	317.319
rs3181096	2	204278337	CD28	A	G	ADD	718	1.144	0.8741	0.1354	0.8774	1.492	0.6704	1.14	0.9939	0.3203	107.941
rs3116494	2	204300266	CD28	G	A	ADD	749	0.8855	1.129	0.1599	0.6472	1.211	0.8254	1.545	-0.7605	0.4469	150.605
rs16840252	2	204439764	CTLA4	A	G	ADD	748	1.02	0.9805	0.1827	0.7129	1.459	0.6854	1.403	0.1078	0.9141	308.052
rs11571317	2	204440253	CTLA4	A	G	ADD	750	0.9071	1.102	0.2394	0.5673	1.45	0.6895	1.763	-0.4073	0.6838	230.441
rs5742909	2	204440592	CTLA4	A	G	ADD	746	0.9223	1.084	0.2431	0.5728	1.485	0.6733	1.746	-0.3327	0.7394	249.178
rs41265961	2	204444106	CTLA4	A	G	ADD	749	1.075	0.9306	0.3337	0.5588	2.067	0.4839	1.79	0.2156	0.8293	279.474
rs11883722	2	204509090	ICOS	A	G	ADD	738	0.9176	1.09	0.1719	0.6551	1.285	0.778	1.526	-0.5	0.6171	207.963
rs4264550	2	204529739	ICOS	A	G	ADD	748	0.8211	1.218	0.214	0.5398	1.249	0.8005	1.853	-0.9206	0.3573	120.41
rs10183087	2	204532569	ICOS	C	A	ADD	749	0.8175	1.223	0.1676	0.5887	1.135	0.8808	1.699	-1.202	0.2292	77.2404
rs10932035	2	204532897	ICOS	A	G	ADD	750	0.8844	1.131	0.2261	0.5678	1.378	0.7259	1.761	-0.5432	0.587	197.819
rs6705653	2	242442232	PDCD1	T	C	ADD	740	0.8597	1.163	0.14	0.6535	1.131	0.8841	1.53	-1.08	0.2803	94.4611
PDCD1_008885	2	242442870	PCDC1	C	G	ADD	740	1.139	0.8783	0.3263	0.6007	2.158	0.4633	1.665	0.3979	0.6907	232.766
rs7419333	2	242443985	PDCD1	G	C	ADD	739	1.309	0.7641	0.1484	0.9784	1.751	0.5712	1.022	1.813	0.06989	23.5529
rs4988457	3	38157140	MYD88	G	C	ADD	746	1.493	0.6698	0.2854	0.8533	2.612	0.3828	1.172	1.404	0.1603	54.0211
rs7744	3	38159025	MYD88	G	A	ADD	750	0.7095	1.409	0.1998	0.4796	1.05	0.9528	2.085	-1.718	0.0858	28.9146
rs6853	3	38159374	MYD88	G	A	ADD	750	1.314	0.7612	0.1965	0.8937	1.931	0.5179	1.119	1.388	0.165	55.605
rs1799988	3	46387263	CCR5	A	G	ADD	742	0.8932	1.12	0.1395	0.6796	1.174	0.8517	1.472	-0.8093	0.4184	141.001
rs352140	3	52231737	TLR9	G	A	ADD	747	1.199	0.8341	0.1342	0.9215	1.56	0.6412	1.085	1.351	0.1767	59.5479
rs187084	3	52236071	TLR9	C	T	ADD	747	0.7526	1.329	0.138	0.5742	0.9863	1.014	1.742	-2.06	0.03941	13.2812
rs17281703	3	120726239	CD80	A	G	ADD	747	0.8078	1.238	0.2222	0.5226	1.249	0.8009	1.914	-0.9608	0.3367	113.468
rs1599796	3	120726624	CD80	A	G	ADD	747	1.07	0.9346	0.1668	0.7716	1.484	0.674	1.296	0.4053	0.6852	230.912
rs7628626	3	120727111	CD80	A	C	ADD	750	1.247	0.8018	0.1661	0.9006	1.727	0.579	1.11	1.329	0.1837	61.9069
rs2629396	3	120731657	CD80	G	T	ADD	749	1.235	0.81	0.1386	0.9408	1.62	0.6173	1.063	1.52	0.1285	43.3045
rs2228017	3	120746370	CD80	A	G	ADD	749	1.164	0.8588	0.1448	0.8768	1.547	0.6466	1.141	1.052	0.293	98.741
rs9282638	3	120746460	CD80	C	T	ADD	749	0.8606	1.162	0.1954	0.5868	1.262	0.7923	1.704	-0.7683	0.4423	149.055
rs16829980	3	120761158	CD80	G	A	ADD	743	0.8886	1.125	0.219	0.5785	1.365	0.7327	1.729	-0.5395	0.5895	198.662
rs16829984	3	120761230	CD80	C	G	ADD	747	0.7419	1.348	0.2255	0.4768	1.154	0.8664	2.097	-1.324	0.1855	62.5135
rs1880661	3	120761538	CD80	T	C	ADD	749	1.085	0.9221	0.1336	0.8347	1.409	0.7097	1.198	0.6074	0.5436	183.193
CD80_035889	3	120795177	CD80	A	G	ADD	747	0.8742	1.144	0.1719	0.6242	1.224	0.8168	1.602	-0.7824	0.434	146.258
rs2681417	3	123307887	CD86	G	A	ADD	750	0.6628	1.509	0.2813	0.3819	1.15	0.8693	2.618	-1.462	0.1437	48.4269
rs1129055	3	123321009	CD86	A	G	ADD	748	0.8602	1.163	0.1595	0.6292	1.176	0.8505	1.589	-0.9445	0.3449	116.231
rs17281995	3	123322331	CD86	G	C	ADD	750	1.328	0.7531	0.1852	0.9235	1.909	0.5238	1.083	1.531	0.1259	42.4283
rs2305619	3	158637555	PTX3	A	G	ADD	744	0.9688	1.032	0.1338	0.7453	1.259	0.7941	1.342	-0.2369	0.8127	273.88
rs3845978	3	158642388	PTX3	A	G	ADD	748	1.272	0.7863	0.3069	0.6969	2.321	0.4309	1.435	0.7832	0.4335	146.089
rs3911403	3	158644821	PTX3	T	A	ADD	746	1.384	0.7227	0.2424	0.8604	2.225	0.4494	1.162	1.34	0.1804	60.7948
rs3921	4	77161967	CXCL10	C	G	ADD	746	0.9191	1.088	0.1468	0.6892	1.226	0.816	1.451	-0.5748	0.5654	190.54
rs4256246	4	77164546	CXCL10	A	G	ADD	747	1.009	0.9909	0.1865	0.7002	1.455	0.6875	1.428	0.04919	0.9608	323.79
rs230525	4	103677907	NFKB1	G	A	ADD	748	1.022	0.978	0.1451	0.7694	1.359	0.736	1.3	0.1532	0.8782	295.953
rs4648050	4	103733779	NFKB1	G	A	ADD	746	1.123	0.8904	0.1459	0.8437	1.495	0.6689	1.185	0.7951	0.4266	143.764
rs4648095	4	103746914	NFKB1	G	A	ADD	749	1.05	0.9523	0.3116	0.5701	1.934	0.517	1.754	0.1568	0.8754	295.01
rs1049253	4	185785945	CASP3	C	T	ADD	747	1.044	0.9579	0.1729	0.7439	1.465	0.6827	1.344	0.2485	0.8037	270.847
rs2705897	4	185790092	CASP3	A	C	ADD	747	1.071	0.9336	0.1529	0.7937	1.446	0.6918	1.26	0.4493	0.6532	220.128
rs2720376	4	185791294	CASP3	G	A	ADD	748	1.041	0.9609	0.1432	0.786	1.378	0.7257	1.272	0.2784	0.7807	263.096
rs2705901	4	185796481	CASP3	G	C	ADD	749	0.9279	1.078	0.1845	0.6463	1.332	0.7506	1.547	-0.4053	0.6852	230.912
rs4647610	4	185804925	CASP3	T	C	ADD	749	1.129	0.8861	0.1898	0.7779	1.637	0.6108	1.285	0.6372	0.524	176.588
rs2720378	4	185805107	CASP3	C	G	ADD	738	1.227	0.8152	0.1507	0.9129	1.648	0.6067	1.095	1.355	0.1753	59.0761
rs4647603	4	185806724	CASP3	T	C	ADD	727	1.086	0.9207	0.1946	0.7417	1.591	0.6287	1.348	0.4247	0.6711	226.161
rs3775296	4	187234761	TLR3	T	G	ADD	750	0.759	1.318	0.1786	0.5349	1.077	0.9285	1.87	-1.544	0.1225	41.2825
rs1879026	4	187237315	TLR3	T	G	ADD	748	0.9559	1.046	0.1821	0.669	1.366	0.7321	1.495	-0.2478	0.8043	271.049
rs3775291	4	187241068	TLR3	T	C	ADD	747	1.164	0.8589	0.1454	0.8755	1.548	0.6459	1.142	1.046	0.2956	99.6172
rs3775290	4	187241211	TLR3	T	C	ADD	750	0.8608	1.162	0.1486	0.6433	1.152	0.8683	1.554	-1.009	0.3129	105.447
rs2069187	5	54433806	GZMA	C	T	ADD	749	0.758	1.319	0.2058	0.5064	1.134	0.8815	1.975	-1.347	0.1781	60.0197
rs1051846	5	54439814	GZMA	C	G	ADD	749	0.8601	1.163	0.2289	0.5492	1.347	0.7423	1.821	-0.6582	0.5104	172.005
rs839	5	131847025	IRF1	T	C	ADD	699	1.2	0.8334	0.1599	0.8771	1.641	0.6092	1.14	1.14	0.2544	85.7328
rs2070729	5	131847820	IRF1	T	G	ADD	742	1.135	0.8808	0.1412	0.8609	1.497	0.6679	1.162	0.8994	0.3685	124.184
rs17622656	5	131848896	IRF1	A	G	ADD	743	0.8644	1.157	0.1464	0.6488	1.152	0.8682	1.541	-0.9949	0.3198	107.773
rs1800630	6	31650455	TNF	A	C	ADD	744	1.029	0.9714	0.1837	0.7182	1.475	0.6778	1.392	0.1578	0.8746	294.74
rs3093662	6	31652168	TNF	G	A	ADD	743	0.9105	1.098	0.2565	0.5508	1.505	0.6644	1.816	-0.3657	0.7146	240.82
rs11914	6	137561281	IFNGR1	G	T	ADD	747	0.9077	1.102	0.1866	0.6297	1.308	0.7643	1.588	-0.5192	0.6036	203.413
rs3799488	6	137561473	IFNGR1	G	A	ADD	748	0.7239	1.381	0.2025	0.4867	1.077	0.9289	2.055	-1.596	0.1106	37.2722
rs1327474	6	137582768	IFNGR1	C	T	ADD	744	1.041	0.9607	0.1386	0.7932	1.366	0.7321	1.261	0.2893	0.7723	260.265
rs752637	7	128366656	IRF5	T	C	ADD	745	1.17	0.855	0.1406	0.888	1.541	0.6491	1.126	1.115	0.265	89.305
rs3807306	7	128367916	IRF5	T	G	ADD	745	0.9486	1.054	0.1402	0.7207	1.249	0.8009	1.388	-0.3764	0.7066	238.124
rs1874328	7	128372340	IRF5	C	T	ADD	747	0.8984	1.113	0.1438	0.6777	1.191	0.8396	1.475	-0.7446	0.4565	153.84
rs10108662	8	39899146	INDO	A	C	ADD	747	1.327	0.7537	0.1426	1.003	1.755	0.5699	0.9966	1.984	0.04727	15.93
rs3739319	8	39904478	INDO	A	G	ADD	749	1.267	0.7892	0.1375	0.9678	1.659	0.6027	1.033	1.722	0.08511	28.6821
rs268561	8	71656476	TRAM1	G	A	ADD	748	0.9015	1.109	0.1448	0.6788	1.197	0.8352	1.473	-0.7161	0.4739	159.704
rs7011101	8	71664028	TRAM1	C	A	ADD	748	1.15	0.8692	0.202	0.7743	1.709	0.585	1.291	0.694	0.4877	164.355
rs3816745	8	71669188	TRAM1	C	G	ADD	749	1.054	0.9485	0.1398	0.8017	1.386	0.7213	1.247	0.378	0.7054	237.72
rs17686100	8	71669566	TRAM1	G	A	ADD	750	1.477	0.6769	0.2329	0.936	2.332	0.4288	1.068	1.676	0.09373	31.587
rs268594	8	71675684	TRAM1	A	G	ADD	745	1.071	0.934	0.1501	0.7977	1.437	0.696	1.254	0.4546	0.6494	218.848
rs268598	8	71677425	TRAM1	G	A	ADD	748	0.6079	1.645	0.2809	0.3505	1.054	0.9487	2.853	-1.772	0.07634	25.7266
rs268600	8	71680925	TRAM1	G	A	ADD	715	0.5608	1.783	0.3846	0.2639	1.192	0.8391	3.789	-1.504	0.1326	44.6862
rs10429491	9	5040706	JAK2	A	G	ADD	748	1.049	0.953	0.1517	0.7794	1.413	0.7079	1.283	0.3171	0.7512	253.154
rs2230724	9	5071780	JAK2	G	A	ADD	747	0.9268	1.079	0.1405	0.7037	1.221	0.8192	1.421	-0.5407	0.5887	198.392
rs12340866	9	5084185	JAK2	A	G	ADD	746	0.9688	1.032	0.1601	0.7078	1.326	0.7542	1.413	-0.1981	0.843	284.091
rs3780378	9	5102288	JAK2	G	A	ADD	745	0.9477	1.055	0.1428	0.7164	1.254	0.7976	1.396	-0.3759	0.707	238.259
rs3780379	9	5102519	JAK2	A	G	ADD	744	1.057	0.9463	0.1769	0.7472	1.494	0.6691	1.338	0.3118	0.7552	254.502
rs10815160	9	5106616	JAK2	C	A	ADD	747	1.105	0.905	0.157	0.8122	1.503	0.6653	1.231	0.6356	0.525	176.925
rs822336	9	5438690	PDCD1L1	G	C	ADD	747	1.183	0.8451	0.1473	0.8866	1.579	0.6332	1.128	1.143	0.2532	85.3284
rs12002985	9	5446587	PDCD1L1	G	C	ADD	749	0.9729	1.028	0.1399	0.7396	1.28	0.7813	1.352	-0.1962	0.8445	284.596
rs17804441	9	5447733	PDCD1L1	G	A	ADD	748	1.056	0.9465	0.1595	0.7728	1.444	0.6924	1.294	0.3445	0.7305	246.179
rs2297137	9	5455732	PDCD1L1	T	C	ADD	734	0.8578	1.166	0.1742	0.6098	1.207	0.8287	1.64	-0.8807	0.3785	127.555
PDCD1L1_017464	9	5456085	PDCD1L	G	A	ADD	747	1.048	0.9544	0.1663	0.7564	1.451	0.689	1.322	0.2805	0.7791	262.557
PDCD1L1_019180	9	5457801	PDCD1L1	A	G	ADD	750	0.8826	1.133	0.3017	0.4886	1.595	0.6272	2.047	-0.4137	0.6791	228.857
rs2297136	9	5457955	PDCD1L1	C	T	ADD	748	1.118	0.8946	0.1363	0.8558	1.46	0.6849	1.168	0.8174	0.4137	139.417
rs4143815	9	5458257	PDCD1L1	C	G	ADD	745	0.7501	1.333	0.1598	0.5484	1.026	0.9747	1.824	-1.8	0.07191	24.2337
rs16923189	9	5500644	PDCD1LG2	G	A	ADD	748	0.9832	1.017	0.1501	0.7326	1.319	0.7579	1.365	-0.1129	0.9101	306.704
rs7854413	9	5547708	PDCD1LG2	G	A	ADD	749	1.05	0.9521	0.2034	0.7049	1.565	0.6391	1.419	0.2412	0.8094	272.768
rs7852996	9	5559860	PDCD1LG2	T	A	ADD	747	1.095	0.9129	0.2076	0.7293	1.645	0.6078	1.371	0.439	0.6607	222.656
rs1051922	9	21067716	IFNB1	T	C	ADD	748	1.26	0.7935	0.1489	0.9412	1.687	0.5926	1.062	1.553	0.1204	40.5748
rs28383793	9	21430416	IFNA	G	A	ADD	750	2.04	0.4903	0.2919	1.151	3.614	0.2767	0.8688	2.442	0.01462	4.92694
rs12685904	9	21431310	IFNA	C	A	ADD	747	1.584	0.6314	0.3651	0.7743	3.239	0.3087	1.291	1.259	0.2079	70.0623
rs10985085	9	122705118	TRAF1	A	G	ADD	749	1.087	0.9203	0.2818	0.6255	1.888	0.5298	1.599	0.2947	0.7682	258.883
rs4836834	9	122705722	TRAF1	T	A	ADD	750	1.115	0.8966	0.1388	0.8497	1.464	0.6831	1.177	0.7861	0.4318	145.517
rs2239657	9	122711341	TRAF1	G	A	ADD	741	1.027	0.9734	0.1416	0.7784	1.356	0.7375	1.285	0.1904	0.849	286.113
rs13440146	9	122721272	TRAF1	A	C	ADD	739	0.9431	1.06	0.2638	0.5624	1.581	0.6323	1.778	-0.2222	0.8241	277.722
rs10824792	10	54196212	MBL2	G	A	ADD	747	1.19	0.8405	0.1393	0.9055	1.563	0.6397	1.104	1.248	0.2122	71.5114
rs11595876	10	54196768	MBL2	G	A	ADD	750	0.9535	1.049	0.2698	0.5619	1.618	0.618	1.78	-0.1764	0.86	289.82
rs930507	10	54198272	MBL2	G	C	ADD	747	1.108	0.9029	0.1762	0.7841	1.564	0.6392	1.275	0.5796	0.5622	189.461
rs1838066	10	54199331	MBL2	G	A	ADD	749	0.7649	1.307	0.148	0.5724	1.022	0.9782	1.747	-1.811	0.07014	23.6372
rs10824793	10	54199486	MBL2	G	A	ADD	749	1.123	0.8905	0.136	0.8601	1.466	0.6821	1.163	0.8526	0.3939	132.744
rs4647964	10	54201105	MBL2	G	G	ADD	715	NA	NA	NA	NA	NA	NA	NA	NA	NA	NA
rs1800450	10	54201241	MBL2	T	C	ADD	750	1.268	0.7885	0.1938	0.8675	1.854	0.5393	1.153	1.226	0.2201	74.1737
rs1889490	10	72027719	PRF1	T	C	ADD	746	0.848	1.179	0.1399	0.6446	1.115	0.8965	1.551	-1.179	0.2385	80.3745
rs35069510	10	72032901	PRF1	T	C	ADD	744	0.9073	1.102	0.2542	0.5513	1.493	0.6697	1.814	-0.3826	0.702	236.574
rs1800682	10	90739943	FAS	C	T	ADD	745	1.252	0.7988	0.1348	0.9612	1.631	0.6133	1.04	1.666	0.09565	32.234
rs2234978	10	90761809	FAS	A	G	ADD	746	0.937	1.067	0.1497	0.6988	1.256	0.7959	1.431	-0.4347	0.6638	223.701
rs1051070	10	90764752	FAS	T	A	ADD	743	1.206	0.8294	0.2294	0.7691	1.89	0.5291	1.3	0.8153	0.4149	139.821
rs17468739	10	91055929	IFIT2	C	A	ADD	746	0.7398	1.352	0.1927	0.5071	1.079	0.9266	1.972	-1.564	0.1177	39.6649
rs2070845	10	91056055	IFIT2	G	A	ADD	748	1.096	0.9121	0.1532	0.812	1.48	0.6755	1.232	0.6004	0.5483	184.777
rs954439	10	91056440	IFIT2	T	A	ADD	709	0.7303	1.369	0.1475	0.547	0.9751	1.026	1.828	-2.131	0.03311	11.1581
rs1727	10	91056749	IFIT2	C	A	ADD	747	0.6691	1.495	0.1663	0.483	0.9269	1.079	2.07	-2.417	0.01566	5.27742
rs303215	10	91146811	IFIT1	G	A	ADD	749	1.168	0.8558	0.163	0.8489	1.608	0.6218	1.178	0.9551	0.3395	114.412
rs11203109	10	91147139	IFIT1	G	A	ADD	748	1.113	0.8985	0.1467	0.8349	1.484	0.674	1.198	0.7299	0.4654	156.84
rs304485	10	91149890	IFIT1	A	T	ADD	747	0.837	1.195	0.137	0.6399	1.095	0.9134	1.563	-1.299	0.1941	65.4117
rs303212	10	91151335	IFIT1	G	A	ADD	749	1.097	0.9115	0.1527	0.8132	1.48	0.6757	1.23	0.6063	0.5443	183.429
rs303211	10	91152477	IFIT1	A	G	ADD	749	0.8598	1.163	0.3413	0.4404	1.679	0.5957	2.271	-0.4424	0.6582	221.813
rs3809112	11	297036	IFITM2	G	A	ADD	746	1.412	0.7081	0.1311	1.092	1.826	0.5477	0.9156	2.633	0.008471	2.85473
rs11246062	11	303755	IFITM1	G	C	ADD	746	1.333	0.7504	0.1453	1.002	1.772	0.5644	0.9977	1.976	0.04818	16.2367
rs3758650	11	606865	IRF7	A	G	ADD	736	0.6355	1.573	0.3598	0.314	1.286	0.7774	3.185	-1.26	0.2077	69.9949
rs731909	11	2365200	CD81	C	G	ADD	747	1.155	0.8658	0.188	0.799	1.67	0.5989	1.252	0.7664	0.4434	149.426
rs800335	11	2367517	CD81	G	A	ADD	742	1.2	0.8334	0.1696	0.8606	1.673	0.5977	1.162	1.075	0.2825	95.2025
rs3740961	11	36466647	TRAF6	C	T	ADD	748	1.067	0.9369	0.1947	0.7287	1.563	0.6397	1.372	0.3346	0.7379	248.672
rs331457	11	36480188	TRAF6	T	C	ADD	746	0.885	1.13	0.2078	0.589	1.33	0.752	1.698	-0.5878	0.5566	187.574
rs5030419	11	36487319	TRAF6	G	C	ADD	745	1.148	0.8714	0.1994	0.7764	1.696	0.5895	1.288	0.6906	0.4898	165.063
rs7127254	11	46265125	CREB3L1	A	G	ADD	749	1.032	0.9688	0.16	0.7543	1.412	0.708	1.326	0.1981	0.843	284.091
rs11038852	11	46270467	CREB3L1	G	C	ADD	747	1.186	0.843	0.1464	0.8904	1.58	0.6328	1.123	1.167	0.2433	81.9921
rs4625425	11	46289469	CREB3L1	C	A	ADD	747	0.8709	1.148	0.1853	0.6057	1.252	0.7986	1.651	-0.7462	0.4555	153.504
rs2288249	11	46290815	CREB3L1	A	G	ADD	747	1.461	0.6846	0.256	0.8845	2.412	0.4145	1.131	1.48	0.1388	46.7756
rs4963271	11	63061760	RARRES3	G	A	ADD	747	1.087	0.9201	0.1687	0.7809	1.513	0.6611	1.281	0.494	0.6213	209.378
rs1131715	11	69731135	FADD	G	A	ADD	747	1.039	0.9625	0.1412	0.7878	1.37	0.7298	1.269	0.2709	0.7865	265.05
rs7115875	11	75737878	PRKRIR	G	A	ADD	742	1.224	0.8171	0.2069	0.8159	1.836	0.5448	1.226	0.9764	0.3289	110.839
rs3824908	11	75754968	PRKRIR	C	A	ADD	748	0.9769	1.024	0.1635	0.7091	1.346	0.743	1.41	-0.1427	0.8865	298.75
rs7925910	11	75765047	PRKRIR	G	A	ADD	746	1.244	0.8041	0.1941	0.8502	1.819	0.5497	1.176	1.124	0.2612	88.0244
rs4320976	11	75765492	PRKRIR	A	G	ADD	749	0.7697	1.299	0.1881	0.5323	1.113	0.8987	1.879	-1.392	0.164	55.268
rs4252249	11	117364419	IL10RA	A	G	ADD	744	0.9474	1.056	0.218	0.6179	1.452	0.6885	1.618	-0.248	0.8041	270.982
rs2508450	11	117369039	IL10RA	A	G	ADD	750	1.126	0.8879	0.1454	0.847	1.498	0.6677	1.181	0.8177	0.4135	139.35
rs3135932	11	117369273	IL10RA	G	A	ADD	749	1.049	0.9533	0.185	0.7299	1.507	0.6634	1.37	0.2585	0.796	268.252
rs4252314	11	117373727	IL10RA	G	A	ADD	749	1.134	0.8822	0.3899	0.5279	2.434	0.4108	1.894	0.3216	0.7478	252.009
rs2229113	11	117374880	IL10RA	A	G	ADD	746	1.095	0.9133	0.1551	0.8079	1.484	0.6739	1.238	0.5845	0.5589	188.349
rs9610	11	117377296	IL10RA	A	G	ADD	750	0.9433	1.06	0.1447	0.7103	1.253	0.7984	1.408	-0.4037	0.6864	231.317
rs8177352	11	125659053	TIRAP	G	A	ADD	736	1.191	0.8396	0.164	0.8637	1.643	0.6088	1.158	1.066	0.2863	96.4831
rs3802813	11	125667678	TIRAP	A	G	ADD	748	1.632	0.6129	0.3046	0.8982	2.964	0.3374	1.113	1.607	0.108	36.396
rs3802814	11	125667817	TIRAP	A	G	ADD	748	1.038	0.9631	0.1807	0.7286	1.48	0.6758	1.372	0.2081	0.8352	281.462
rs8177375	11	125668274	TIRAP	G	A	ADD	749	0.8843	1.131	0.2201	0.5744	1.361	0.7346	1.741	-0.5588	0.5763	194.213
rs8177376	11	125668822	TIRAP	C	A	ADD	748	0.5957	1.679	0.1814	0.4174	0.8501	1.176	2.396	-2.855	0.004302	1.44977
rs625413	11	125669559	TIRAP	A	G	ADD	749	1.165	0.8585	0.156	0.8579	1.582	0.6323	1.166	0.9778	0.3282	110.603
rs1786704	11	125670967	TIRAP	G	A	ADD	748	1.212	0.825	0.1576	0.89	1.651	0.6057	1.124	1.221	0.2223	74.9151
rs17199006	12	7775618	CLEC4C	G	A	ADD	749	0.9668	1.034	0.1862	0.6712	1.392	0.7182	1.49	-0.1816	0.8559	288.438
rs1894823	12	7781816	CLEC4C	A	G	ADD	747	0.7869	1.271	0.1653	0.5692	1.088	0.9191	1.757	-1.45	0.1471	49.5727
rs10845821	12	7791451	CLEC4C	A	G	ADD	748	0.8395	1.191	0.1462	0.6303	1.118	0.8943	1.587	-1.196	0.2316	78.0492
rs4251460	12	42449035	IRAK4	C	A	ADD	747	1.101	0.9083	0.2039	0.7383	1.642	0.6091	1.355	0.4715	0.6373	214.77
rs4251513	12	42460471	IRAK4	G	C	ADD	748	1.414	0.7072	0.1421	1.07	1.868	0.5352	0.9344	2.438	0.01479	4.98423
rs4251580	12	42461033	IRAK4	A	G	ADD	747	1.15	0.8693	0.2023	0.7738	1.71	0.5848	1.292	0.6921	0.4889	164.759
rs4251520	12	42461605	IRAK4	G	A	ADD	746	1.344	0.7443	0.1991	0.9095	1.985	0.5039	1.1	1.483	0.138	46.506
rs4251545	12	42466562	IRAK4	A	G	ADD	746	1.049	0.9533	0.2213	0.6798	1.619	0.6178	1.471	0.2159	0.829	279.373
rs1544410	12	46526102	VDR	T	C	ADD	748	1.006	0.9943	0.1343	0.7729	1.309	0.7642	1.294	0.04253	0.9661	325.576
rs2066807	12	55026949	STAT2	G	C	ADD	749	0.8308	1.204	0.2557	0.5034	1.371	0.7292	1.987	-0.725	0.4685	157.885
rs7316037	12	63133078	TBK1	A	G	ADD	736	1.365	0.7324	0.2221	0.8836	2.11	0.4739	1.132	1.403	0.1608	54.1896
rs11175398	12	63137245	TBK1	G	A	ADD	744	1.006	0.9941	0.1357	0.771	1.313	0.7619	1.297	0.04391	0.965	325.205
rs10878175	12	63153605	TBK1	C	G	ADD	745	1.167	0.8571	0.1481	0.8728	1.56	0.6412	1.146	1.041	0.2977	100.325
rs7303577	12	63160369	TBK1	C	A	ADD	750	0.8858	1.129	0.2082	0.589	1.332	0.7507	1.698	-0.5826	0.5602	188.787
rs2069727	12	66834490	IFNG	C	T	ADD	745	0.9398	1.064	0.1371	0.7184	1.23	0.8133	1.392	-0.4527	0.6507	219.286
rs2069718	12	66836429	IFNG	T	C	ADD	749	0.9373	1.067	0.1353	0.719	1.222	0.8185	1.391	-0.4791	0.6319	212.95
rs2069716	12	66837082	IFNG	C	T	ADD	747	1.074	0.931	0.2956	0.6018	1.917	0.5216	1.662	0.2418	0.809	272.633
rs1861494	12	66837676	IFNG	G	A	ADD	746	0.9421	1.061	0.145	0.709	1.252	0.7989	1.41	-0.4113	0.6808	229.43
rs10744785	12	111829639	OAS1	G	C	ADD	745	0.8903	1.123	0.1811	0.6243	1.27	0.7877	1.602	-0.642	0.5209	175.543
rs34137742	12	111833044	OAS1	A	G	ADD	721	1.843	0.5426	0.2362	1.16	2.928	0.3415	0.8621	2.588	0.009647	3.25104
rs3741981	12	111833253	OAS1	G	A	ADD	748	0.9501	1.053	0.2217	0.6152	1.467	0.6815	1.626	-0.2309	0.8174	275.464
OAS1_004547	12	111833482	OAS1	A	G	ADD	741	0.8721	1.147	0.2903	0.4937	1.541	0.6491	2.026	-0.4713	0.6374	214.804
rs10774671	12	111841576	OAS1	G	A	ADD	748	0.8014	1.248	0.3205	0.4276	1.502	0.6658	2.338	-0.6907	0.4898	165.063
rs1859330	12	111860771	OAS3	C	T	ADD	727	0.8552	1.169	0.3373	0.4415	1.657	0.6037	2.265	-0.4638	0.6428	216.624
rs7961861	12	111870301	OAS3	G	A	ADD	738	1.593	0.6277	0.2889	0.9045	2.806	0.3563	1.106	1.612	0.1069	36.0253
rs2285933	12	111871162	OAS3	G	C	ADD	749	0.7204	1.388	0.2741	0.421	1.233	0.8112	2.375	-1.196	0.2315	78.0155
rs2285932	12	111871333	OAS3	T	C	ADD	747	0.9515	1.051	0.3257	0.5025	1.802	0.5551	1.99	-0.1526	0.8787	296.122
rs2072136	12	111883302	OAS3	T	C	ADD	750	0.9815	1.019	0.1869	0.6804	1.416	0.7063	1.47	-0.09967	0.9206	310.242
OAS3_026920	12	111885590	OAS3	A	G	ADD	741	1.519	0.6582	0.2588	0.9148	2.523	0.3964	1.093	1.616	0.1061	35.7557
OAS3_029396	12	111888066	OAS3	A	G	ADD	732	1.038	0.9629	0.2485	0.6381	1.69	0.5917	1.567	0.1519	0.8792	296.29
rs2240188	12	111888067	OAS3	T	C	ADD	731	0.8484	1.179	0.2875	0.4829	1.491	0.6708	2.071	-0.5715	0.5676	191.281
rs2010549	12	111893380	OAS3	G	C	ADD	745	1.144	0.874	0.1923	0.7848	1.668	0.5995	1.274	0.7002	0.4838	163.041
rs2072133	12	111893643	OAS3	C	T	ADD	748	1.032	0.9693	0.252	0.6296	1.691	0.5915	1.588	0.1238	0.9015	303.805
rs7138261	12	111894353	OAS3	A	G	ADD	706	0.6023	1.66	0.3574	0.299	1.213	0.8241	3.345	-1.419	0.156	52.572
rs2072138	12	111909276	OAS2	C	G	ADD	747	0.7211	1.387	0.2595	0.4337	1.199	0.8339	2.306	-1.26	0.2077	69.9949
rs35992364	12	111917267	OAS2	G	A	ADD	750	1.126	0.8882	0.2496	0.6903	1.836	0.5446	1.449	0.4749	0.6349	213.961
rs1293755	12	111919833	OAS2	T	A	ADD	747	0.755	1.324	0.3094	0.4117	1.385	0.7222	2.429	-0.9083	0.3637	122.567
rs2072137	12	111925304	OAS2	C	T	ADD	748	0.9671	1.034	0.1993	0.6544	1.429	0.6996	1.528	-0.1676	0.8669	292.145
rs929291	12	111928801	OAS2	T	C	ADD	743	1.138	0.8786	0.2721	0.6677	1.94	0.5154	1.498	0.4755	0.6344	213.793
rs916973	12	111931486	OAS2	C	T	ADD	745	0.945	1.058	0.2688	0.5581	1.6	0.6249	1.792	-0.2104	0.8334	280.856
rs15895	12	111932671	OAS2	T	C	ADD	750	0.8906	1.123	0.2374	0.5593	1.418	0.7051	1.788	-0.4879	0.6256	210.827
rs13311	12	111933035	OAS2	A	C	ADD	748	0.9414	1.062	0.2035	0.6317	1.403	0.7128	1.583	-0.2969	0.7666	258.344
rs1296371	12	111934088	OAS2	C	T	ADD	727	1.092	0.9155	0.1812	0.7657	1.558	0.6418	1.306	0.4872	0.6261	210.996
rs12819210	12	119942783	OASL	A	G	ADD	750	1.487	0.6725	0.1593	1.088	2.032	0.4921	0.9191	2.49	0.01279	4.31023
rs3213546	12	119955599	OASL	C	G	ADD	749	1.316	0.7598	0.4006	0.6002	2.886	0.3465	1.666	0.6857	0.4929	166.107
rs3213545	12	119955720	OASL	T	C	ADD	746	0.6478	1.544	0.1697	0.4645	0.9034	1.107	2.153	-2.558	0.01052	3.54524
rs10774580	12	119960806	OASL	A	G	ADD	748	0.9119	1.097	0.1439	0.6877	1.209	0.827	1.454	-0.6407	0.5217	175.813
rs28360475	12	119961429	OASL	G	A	ADD	747	1.109	0.9013	0.1593	0.812	1.516	0.6596	1.232	0.6521	0.5143	173.319
rs2236350	14	23700850	ISGF3G	T	G	ADD	745	0.6998	1.429	0.242	0.4355	1.125	0.8892	2.296	-1.475	0.1403	47.2811
rs12436555	14	23704665	ISGF3G	A	G	ADD	745	1.164	0.8591	0.1698	0.8346	1.624	0.6159	1.198	0.8948	0.3709	124.993
rs2236338	14	24170122	GZMB	G	A	ADD	747	1.047	0.9555	0.1622	0.7615	1.438	0.6952	1.313	0.2805	0.7791	262.557
rs11539752	14	24171429	GZMB	C	G	ADD	746	1.005	0.9947	0.1676	0.7239	1.396	0.7162	1.381	0.032	0.9745	328.406
rs2273844	14	24173254	GZMB	A	G	ADD	749	0.9981	1.002	0.1642	0.7235	1.377	0.7263	1.382	-0.01147	0.9908	333.9
rs28489163	14	93645984	IFI27	A	G	ADD	748	1.744	0.5732	0.1908	1.2	2.536	0.3944	0.8332	2.916	0.003541	1.19332
IFI27_000630	14	93646335	IFI27	G	C	ADD	749	0.9494	1.053	0.1623	0.6907	1.305	0.7663	1.448	-0.3201	0.7489	252.379
rs3814821	14	93646690	IFI27	T	C	ADD	750	0.893	1.12	0.1342	0.6865	1.162	0.8608	1.457	-0.843	0.3992	134.53
rs2799	14	93652679	IFI27	C	G	ADD	738	0.9612	1.04	0.2725	0.5635	1.64	0.6099	1.775	-0.1453	0.8845	298.077
IFI27_007273	14	93652978	IFI27	0	C	ADD	749	NA	NA	NA	NA	NA	NA	NA	NA	NA	NA
rs1243081	14	93653215	IFI27	A	G	ADD	709	1.126	0.8877	0.2203	0.7315	1.735	0.5765	1.367	0.5407	0.5887	198.392
rs7141881	14	93653617	IFI27	A	G	ADD	747	1.429	0.6999	0.1453	1.075	1.899	0.5265	0.9304	2.457	0.01402	4.72474
rs1243082	14	93653748	IFI27	A	C	ADD	748	1.915	0.5221	0.2409	1.194	3.072	0.3256	0.8372	2.698	0.006984	2.35361
rs10132928	14	93654162	IFI27	G	A	ADD	748	1.26	0.7938	0.1393	0.9588	1.655	0.6042	1.043	1.658	0.09735	32.807
rs4780355	16	11255359	SOCS1	G	A	ADD	733	1.002	0.998	0.1484	0.7491	1.34	0.7461	1.335	0.01349	0.9892	333.36
rs243330	16	11258492	SOCS1	T	C	ADD	732	0.9934	1.007	0.1363	0.7605	1.298	0.7706	1.315	-0.04834	0.9614	323.992
rs3760396	17	29605554	CCL2	G	C	ADD	750	0.8797	1.137	0.1688	0.6318	1.225	0.8165	1.583	-0.7594	0.4476	150.841
rs2857656	17	29606120	CCL2	G	C	ADD	745	0.9055	1.104	0.1525	0.6716	1.221	0.819	1.489	-0.6507	0.5152	173.622
rs4586	17	29607382	CCL2	G	A	ADD	748	1.05	0.9525	0.1428	0.7935	1.389	0.7199	1.26	0.3407	0.7333	247.122
rs4969168	17	73865388	SOCS3	A	G	ADD	744	0.9774	1.023	0.1782	0.6893	1.386	0.7216	1.451	-0.1282	0.898	302.626
rs2292151	19	4767719	TICAM1	T	C	ADD	745	1.202	0.8323	0.155	0.8867	1.628	0.6142	1.128	1.184	0.2363	79.6331
rs7255265	19	4769378	TICAM1	A	G	ADD	748	0.9298	1.075	0.1416	0.7045	1.227	0.8148	1.419	-0.5139	0.6073	204.66
rs12609318	19	6614916	TNFSF14	A	G	ADD	744	1.138	0.8788	0.1552	0.8394	1.542	0.6483	1.191	0.832	0.4054	136.62
rs1077667	19	6619972	TNFSF14	T	C	ADD	749	0.7332	1.364	0.1842	0.511	1.052	0.9505	1.957	-1.685	0.09205	31.0209
rs8106574	19	6622142	TNFSF14	A	G	ADD	741	0.9261	1.08	0.1636	0.672	1.276	0.7837	1.488	-0.4696	0.6386	215.208
rs8112310	19	7710320	CD209	A	T	ADD	749	1.257	0.7956	0.1813	0.881	1.793	0.5576	1.135	1.261	0.2073	69.8601
rs4804801	19	7713482	CD209	T	A	ADD	713	1.485	0.6734	0.2158	0.9728	2.267	0.4411	1.028	1.832	0.06694	22.5588
rs4804802	19	7713610	CD209	A	G	ADD	749	1.016	0.9845	0.2336	0.6426	1.606	0.6228	1.556	0.06691	0.9467	319.038
rs8105572	19	7715327	CD209	A	G	ADD	744	1.137	0.8797	0.2108	0.752	1.718	0.582	1.33	0.6077	0.5434	183.126
rs11465384	19	7716006	CD209	T	C	ADD	747	0.9456	1.057	0.2595	0.5687	1.572	0.6359	1.758	-0.2154	0.8295	279.541
rs2287886	19	7718536	CD209	A	G	ADD	746	1.117	0.8951	0.1438	0.8429	1.481	0.6753	1.186	0.771	0.4407	148.516
rs735240	19	7719336	CD209	A	G	ADD	747	0.782	1.279	0.1384	0.5962	1.026	0.975	1.677	-1.777	0.07557	25.4671
rs7252764	19	7733137	CLEC4M	A	G	ADD	746	1.103	0.9062	0.3143	0.596	2.043	0.4895	1.678	0.3133	0.754	254.098
rs2287887	19	7733955	CLEC4M	C	A	ADD	746	1.12	0.8926	0.1517	0.8322	1.508	0.663	1.202	0.749	0.4538	152.931
rs868876	19	7737226	CLEC4M	A	T	ADD	747	1.214	0.8236	0.1516	0.902	1.634	0.6119	1.109	1.28	0.2005	67.5685
rs475896	19	7737429	CLEC4M	C	G	ADD	749	1.224	0.8167	0.1429	0.9252	1.62	0.6172	1.081	1.416	0.1567	52.8079
rs558705	19	7738183	CLEC4M	T	C	ADD	744	0.6949	1.439	0.2483	0.4272	1.131	0.8845	2.341	-1.466	0.1427	48.0899
rs557094	19	7738286	CLEC4M	G	C	ADD	746	1.284	0.7788	0.2005	0.8668	1.902	0.5257	1.154	1.247	0.2125	71.6125
rs2161525	19	7738664	CLEC4M	G	A	ADD	745	0.9613	1.04	0.144	0.7249	1.275	0.7845	1.38	-0.2744	0.7838	264.141
rs8113469	19	7738959	CLEC4M	G	A	ADD	742	0.9867	1.013	0.1597	0.7215	1.349	0.7411	1.386	-0.08376	0.9332	314.488
rs12610506	19	7739071	CLEC4M	A	G	ADD	748	1.082	0.9238	0.146	0.8131	1.441	0.6939	1.23	0.5428	0.5873	197.92
rs3745376	19	7739690	CLEC4M	A	C	ADD	747	1.001	0.9988	0.1769	0.7078	1.416	0.7061	1.413	0.006716	0.9946	335.18
rs15282	19	7740274	CLEC4M	T	C	ADD	749	1.313	0.7614	0.1429	0.9926	1.738	0.5754	1.007	1.908	0.05643	19.0169
rs2304207	19	54859538	IRF3	C	G	ADD	747	0.7677	1.303	0.1889	0.5302	1.112	0.8996	1.886	-1.4	0.1616	54.4592
rs2304204	19	54860832	IRF3	C	T	ADD	748	0.9127	1.096	0.15	0.6802	1.225	0.8165	1.47	-0.6089	0.5426	182.856
rs752118	20	44180145	CD40	A	G	ADD	746	0.9234	1.083	0.1672	0.6653	1.282	0.7803	1.503	-0.4768	0.6335	213.489
rs745307	20	44180493	CD40	T	C	ADD	743	0.898	1.114	0.1662	0.6483	1.244	0.8039	1.542	-0.647	0.5177	174.465
rs3765457	20	44190620	CD40	G	A	ADD	748	0.9947	1.005	0.1914	0.6836	1.447	0.6909	1.463	-0.02775	0.9779	329.552
rs3765459	20	44190814	CD40	A	G	ADD	744	0.9895	1.011	0.1699	0.7093	1.38	0.7245	1.41	-0.06221	0.9504	320.285
rs11569345	20	44191928	CD40	A	G	ADD	749	0.7569	1.321	0.4162	0.3348	1.711	0.5843	2.987	-0.669	0.5035	169.679
rs11569348	20	44192680	CD40	A	C	ADD	745	0.8346	1.198	0.2122	0.5506	1.265	0.7904	1.816	-0.8519	0.3943	132.879
rs2226299	21	33620794	IFNAR1	A	G	ADD	742	1.037	0.9644	0.1756	0.735	1.463	0.6836	1.36	0.2067	0.8363	281.833
rs2252930	21	33626071	IFNAR1	C	G	ADD	749	0.774	1.292	0.155	0.5713	1.049	0.9536	1.75	-1.653	0.09829	33.1237
rs2252931	21	33626190	IFNAR1	A	G	ADD	749	0.7682	1.302	0.1555	0.5664	1.042	0.9597	1.766	-1.696	0.08996	30.3165
rs17643419	21	33633668	IFNAR1	A	G	ADD	749	0.8874	1.127	0.2722	0.5205	1.513	0.6609	1.921	-0.4387	0.6609	222.723
rs2253923	21	33634289	IFNAR1	A	T	ADD	750	1.101	0.9084	0.1375	0.8408	1.441	0.6938	1.189	0.6985	0.4849	163.411
rs2257167	21	33637569	IFNAR1	G	C	ADD	747	1.269	0.7878	0.1905	0.8737	1.844	0.5423	1.145	1.251	0.2108	71.0396
rs12483293	21	33638659	IFNAR1	C	A	ADD	748	1.027	0.9738	0.1443	0.774	1.363	0.7339	1.292	0.1842	0.8539	287.764
rs2243600	21	33645531	IFNAR1	A	C	ADD	749	0.936	1.068	0.1545	0.6914	1.267	0.7892	1.446	-0.4281	0.6686	225.318
rs2834202	21	33652824	IFNAR1	G	A	ADD	745	0.9357	1.069	0.1599	0.684	1.28	0.7813	1.462	-0.4158	0.6775	228.317
rs9808753	21	33709182	IFNGR2	G	A	ADD	748	1.158	0.8634	0.1956	0.7894	1.699	0.5884	1.267	0.7508	0.4528	152.594
rs11910627	21	33721220	IFNGR2	G	C	ADD	748	0.6496	1.539	0.1622	0.4727	0.8927	1.12	2.116	-2.66	0.007825	2.63702
rs1059293	21	33731563	IFNGR2	A	G	ADD	750	1.493	0.6697	0.1345	1.147	1.944	0.5145	0.8718	2.98	0.002882	0.971234
rs2071430	21	41719935	MX1	0	C	ADD	738	NA	NA	NA	NA	NA	NA	NA	NA	NA	NA
rs7280422	21	41723437	MX1	C	G	ADD	744	0.8485	1.179	0.1774	0.5993	1.201	0.8325	1.669	-0.9263	0.3543	119.399
rs455599	21	41726549	MX1	G	A	ADD	749	1.679	0.5956	0.2725	0.9843	2.864	0.3492	1.016	1.902	0.05717	19.2663
rs457347	21	41726740	MX1	G	A	ADD	746	1.598	0.6257	0.2722	0.9375	2.725	0.367	1.067	1.723	0.08494	28.6248
rs468672	21	41728034	MX1	A	T	ADD	734	1.312	0.7622	0.2498	0.8041	2.141	0.4671	1.244	1.087	0.277	93.349
rs2838036	21	41729610	MX1	A	T	ADD	748	1.427	0.7008	0.399	0.6529	3.119	0.3206	1.532	0.8912	0.3728	125.634
rs8132871	21	41732690	MX1	A	G	ADD	745	0.7146	1.399	0.2025	0.4805	1.063	0.9409	2.081	-1.659	0.09707	32.7126
rs467558	21	41733265	MX1	G	A	ADD	743	1.008	0.9924	0.2406	0.6289	1.615	0.6193	1.59	0.03192	0.9745	328.406
rs467960	21	41734761	MX1	G	A	ADD	750	0.7722	1.295	0.2615	0.4625	1.289	0.7758	2.162	-0.9889	0.3227	108.75
rs469390	21	41739800	MX1	G	A	ADD	750	0.7886	1.268	0.2517	0.4815	1.291	0.7743	2.077	-0.9437	0.3453	116.366
rs7277299	21	41740660	MX1	A	C	ADD	749	1.132	0.8837	0.265	0.6732	1.902	0.5257	1.485	0.4666	0.6408	215.95
rs467639	21	41741434	MX1	A	T	ADD	746	1.078	0.9275	0.2307	0.6859	1.695	0.5901	1.458	0.3261	0.7444	250.863
rs2070229	21	41742983	MX1	G	A	ADD	748	1.296	0.7713	0.2425	0.806	2.085	0.4796	1.241	1.071	0.2843	95.8091
rs469218	21	41743564	MX1	A	G	ADD	695	1.096	0.9125	0.3123	0.5942	2.021	0.4947	1.683	0.2931	0.7694	259.288
rs3737399	21	41745242	MX1	A	G	ADD	744	0.9246	1.082	0.2423	0.5751	1.487	0.6727	1.739	-0.3237	0.7462	251.469
rs1050008	21	41746531	MX1	G	A	ADD	749	0.7895	1.267	0.2134	0.5196	1.199	0.8338	1.924	-1.108	0.2679	90.2823
rs467593	21	41748421	MX1	G	A	ADD	745	1.294	0.7728	0.245	0.8006	2.091	0.4781	1.249	1.052	0.2928	98.6736
rs468811	21	41751716	MX1	A	G	ADD	749	0.8442	1.185	0.2014	0.5689	1.253	0.7983	1.758	-0.8412	0.4003	134.901
rs13433394	21	41753780	MX1	A	G	ADD	748	1.168	0.8565	0.1829	0.8159	1.671	0.5985	1.226	0.8472	0.3969	133.755
rs4819387	21	44471630	B7H2	A	G	ADD	750	1.097	0.912	0.1391	0.8349	1.44	0.6944	1.198	0.6624	0.5077	171.095
rs4819388	21	44471849	B7H2	A	G	ADD	746	1.126	0.8879	0.1527	0.8349	1.519	0.6582	1.198	0.7782	0.4364	147.067
rs11558819	21	44481202	B7H2	T	C	ADD	747	1.044	0.9582	0.154	0.7718	1.411	0.7086	1.296	0.2771	0.7817	263.433
rs378299	21	44485771	B7H2	C	T	ADD	737	0.9403	1.063	0.1433	0.71	1.245	0.803	1.408	-0.4293	0.6677	225.015
Legend
SNP	Single Nucleotide Polymorphisms
CHR	Chromosome
Position	Genomic Position
Gene	HUGO gene name
Minor Allele	Minor allele according to the frequency reported for this dataset
Major Allele	Major allele according to the frequency reported for this dataset
TEST	Association test performed
n	Number of individuals included in the analysis
OR Minor Allele	Odds ratio using the minor allele
OR Major Allele	Odds ratio using the major allele
SE	Standard Error
L95 Minor Allele	Lower 95% Confidence Interval for the odds ratio calculated for the minor allele
U95 Minor Allele	Upper 95% Confidence Interval for the odds ratio calculated for the minor allele
L95 Major Allele	Lower 95% Confidence Interval for the odds ratio calculated for the major allele
U95 Major Allele	Upper 95% Confidence Interval for the odds ratio calculated for the major allele
STAT	Coefficient t-statistic
P-value	Asymptotic p-value for t-statistic
Bonferroni P-value	Bonferroni corrected p-value
