# Supplementary material for: Host Genetic Risk Factors for West Nile Virus Infection and Disease Progression
Source: PLoS One. 2011 Sep 15;6(9):e24745. doi: 10.1371/journal.pone.0024745 (PMC3174177; doi:10.1371/journal.pone.0024745)
Supplement: Table S16 — CCR5 logistic regression results. (XLS) [file pone.0024745.s016.xls]

## Sheet: Sheet1
Table S16. CCR5 logistic regression results.
Disease Model	Inheritance Model	OR	p-value	95% CI
Symptomatic Infection	Dominant	1.055	0.8204	0.66-1.68
	Recessive	0.76	0.8016	0.09-6.44
WNE/P	Dominant	1.008	0.9641	0.70-1.45
	Recessive	2.089	0.3825	0.34-10.92
CCR5Δ32 is not significantly associated with symptomatic infection or WNE/P. ORs were calculated using logistic regression that controlled for population stratification. Two disease models were used and include WNV infection vs. asymptomatic controls (symptomatic infection) and WNE/P vs. WNF/M combined with asymptomatic controls (WNE/P).
Odds Ratio (OR)
Confidence interval (CI)
West Nile encephalits/paralysis (WNE/P)
