# Supplementary material for: Host Genetic Risk Factors for West Nile Virus Infection and Disease Progression
Source: PLoS One. 2011 Sep 15;6(9):e24745. doi: 10.1371/journal.pone.0024745 (PMC3174177; doi:10.1371/journal.pone.0024745)
Supplement: Table S20 — OAS1 SNP contingency table analysis using different meningitis classifications. (XLS) [file pone.0024745.s020.xls]

## Sheet: Sheet1
Table S20. OAS1 SNP contingency table analysis using different meningitis classifications.
SNP	CHR		Gene	Minor Allele	Major Allele	TEST			Cases		Controls		n	CHISQ	DF	P-value	Bonferroni P-Value	OR Minor Allele	OR Major Allele
		Position					Cases	Controls	DD	Dd/dd	DD	Dd/dd
rs34137742	12	111833044	OAS1	A	G	REC	WNE/P	WNF + Asymptomatic (Meningitis removed)	11	115	9	514	649	16.7	1	4.372e-05	0.0147336	0.183056	5.4628
rs34137742	12	111833044	OAS1	A	G	REC	WNND (meningitis included)	WNF + Asymptomatic	11	185	9	515	720	8.012	1	0.004647	1.56604	0.29391	3.4024
rs34137742	12	111833044	OAS1	A	G	REC	WNE/P	WNF/M + Asymptomatic (Meningitis included)	11	115	10	586	722	18.32	1	1.869e-05	0.00629853	0.178405	5.60522
